# Supplementary material
Source: PubMed Central journal article supplement (PMC8478862)

**Trace – sp**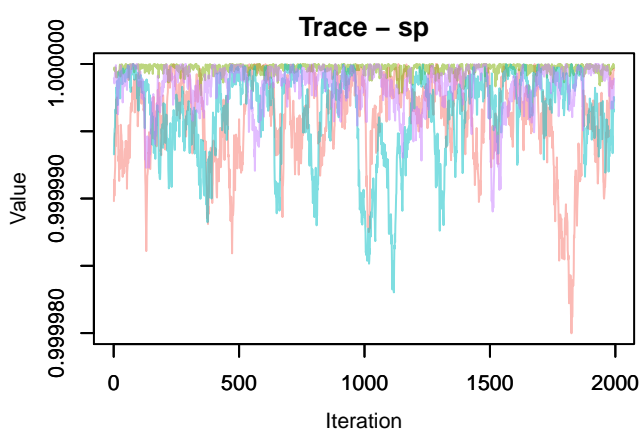**Density – sp**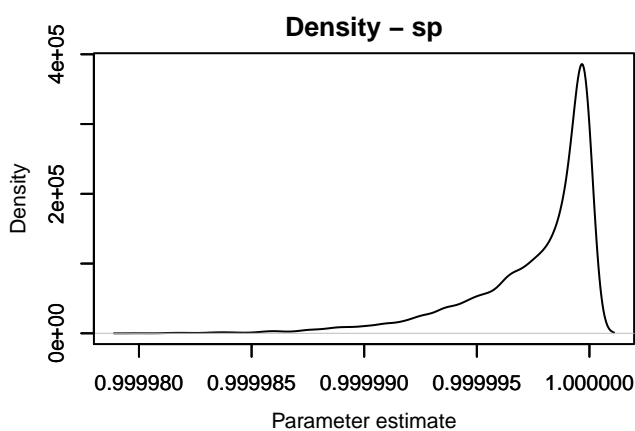**Trace – sn.wt**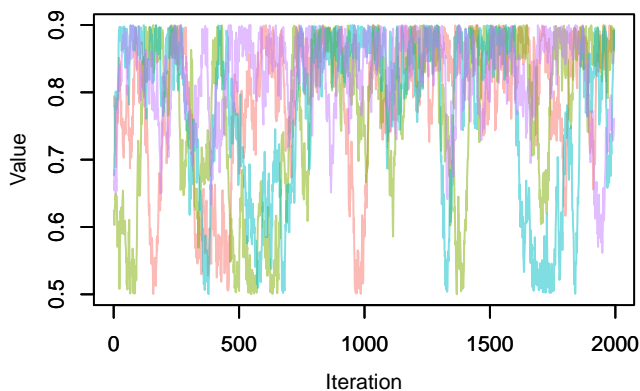**Density – sn.wt**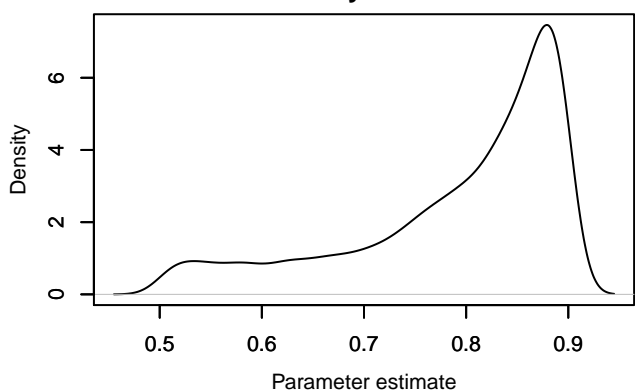**Trace – sn.kn[1]**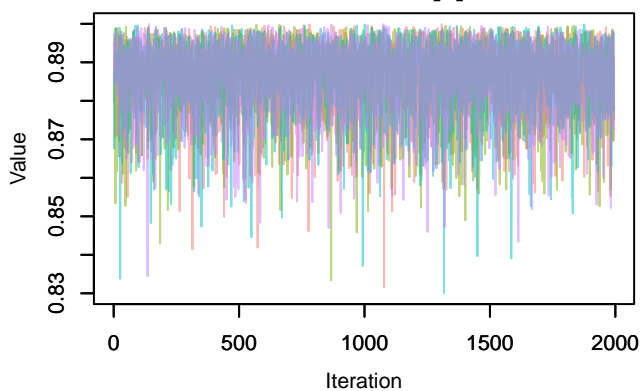**Density – sn.kn[1]**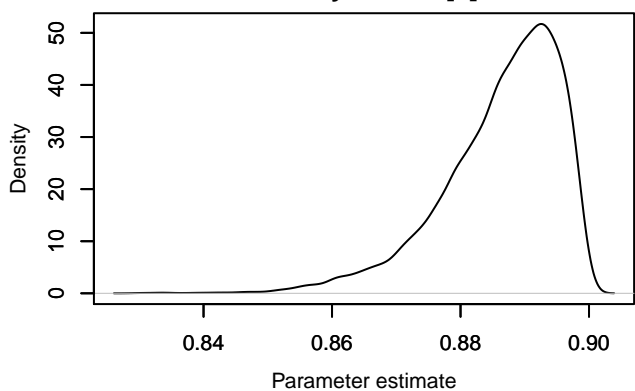

**Trace – sn.kn[2]**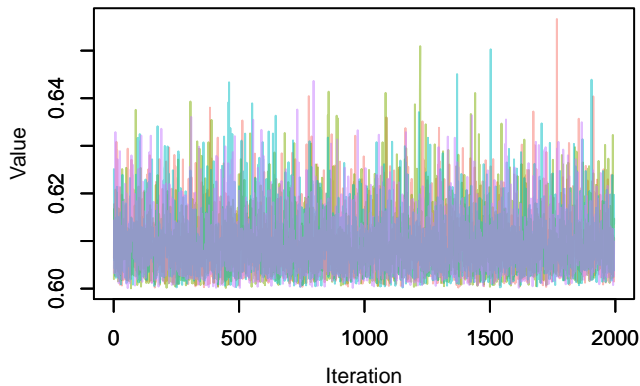**Density – sn.kn[2]**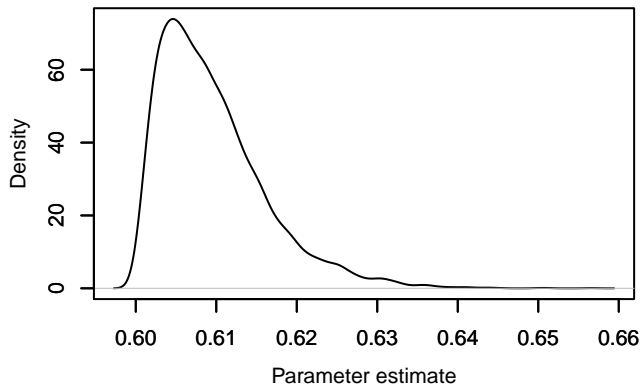**Trace – r.kn[1]**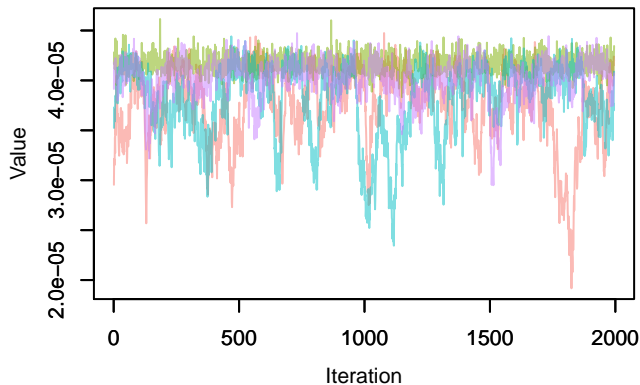**Density – r.kn[1]**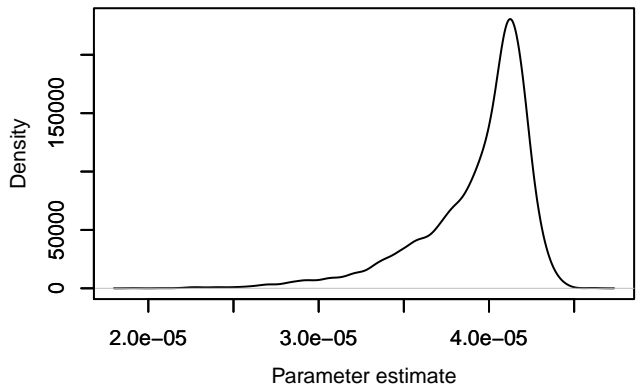**Trace – r.kn[2]**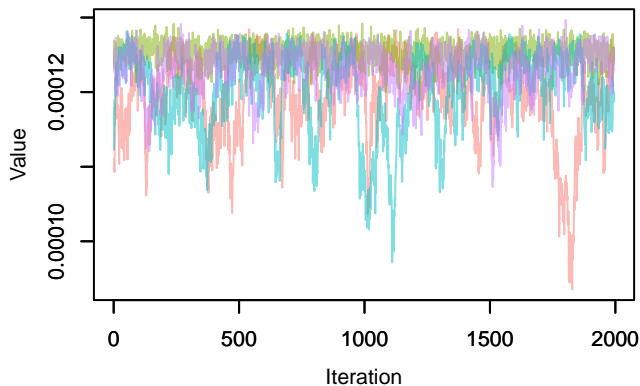**Density – r.kn[2]**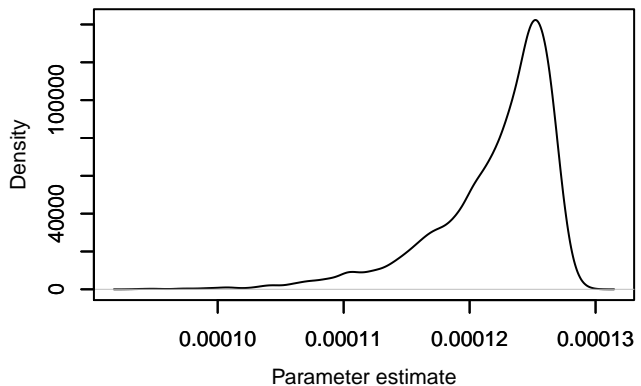

**Trace – y[1]**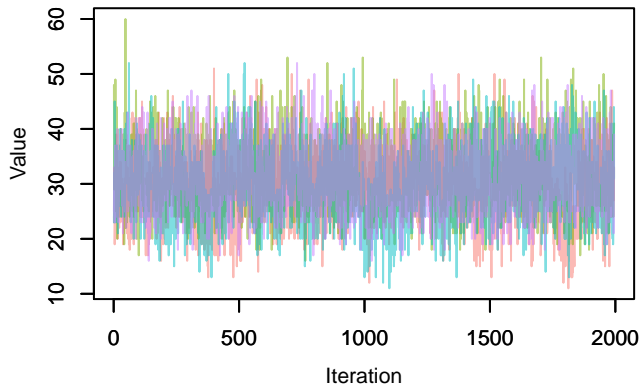**Density – y[1]**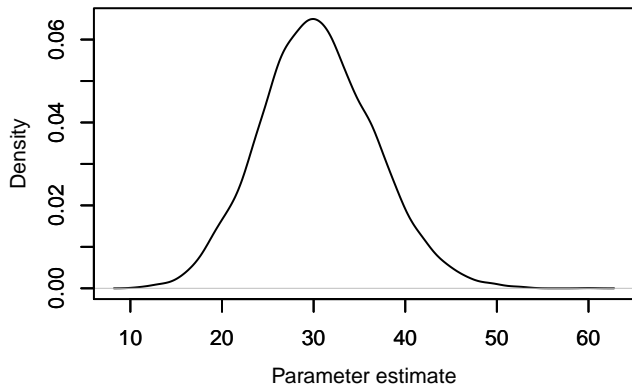**Trace – y[2]**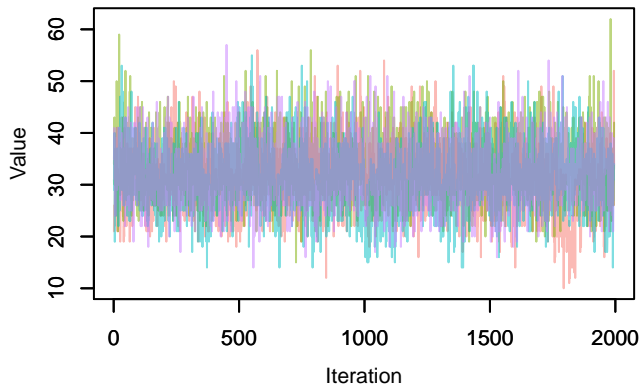**Density – y[2]**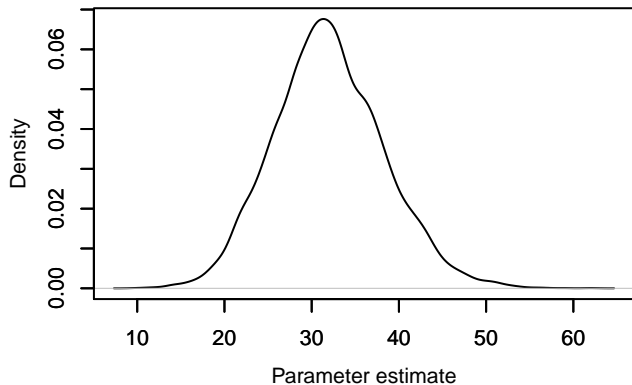**Trace – y[3]**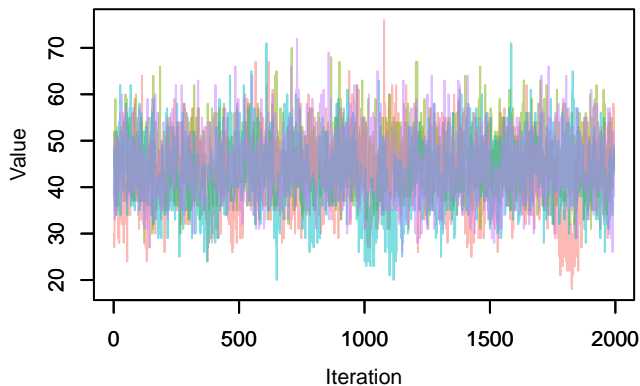**Density – y[3]**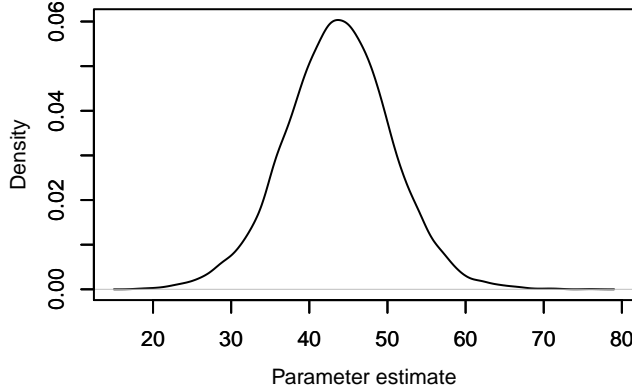

**Trace – y[4]**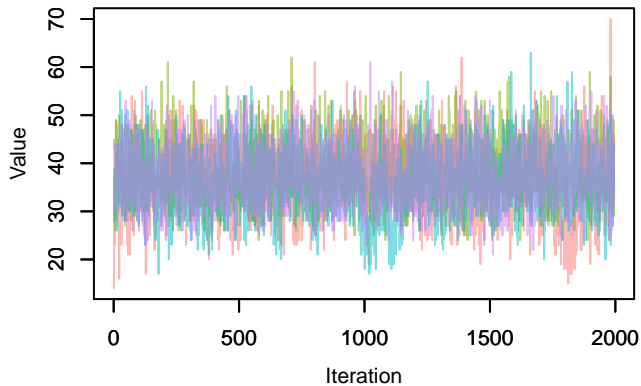**Density – y[4]**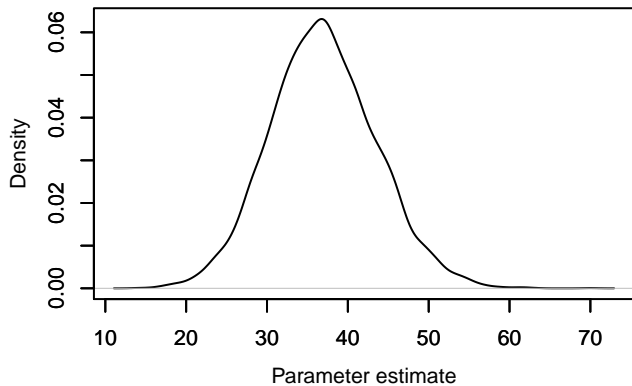**Trace – y[5]**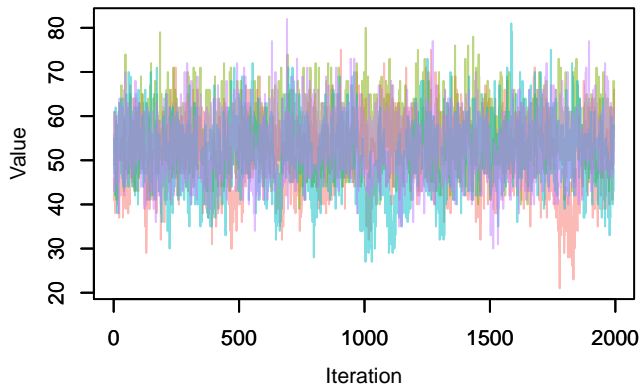**Density – y[5]**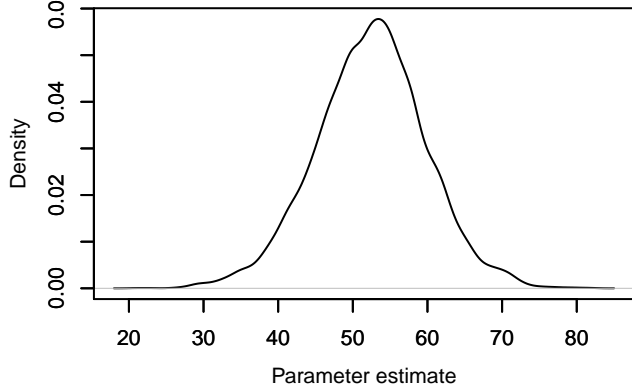**Trace – y[6]**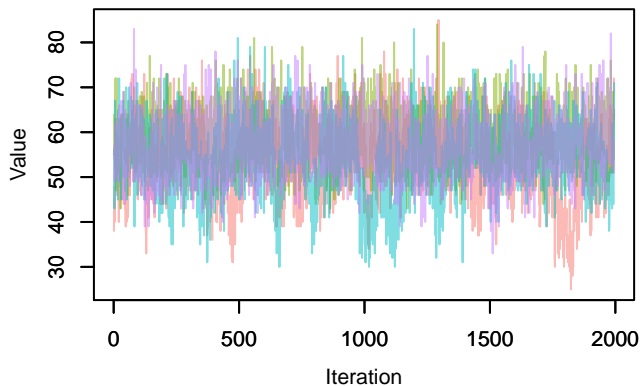**Density – y[6]**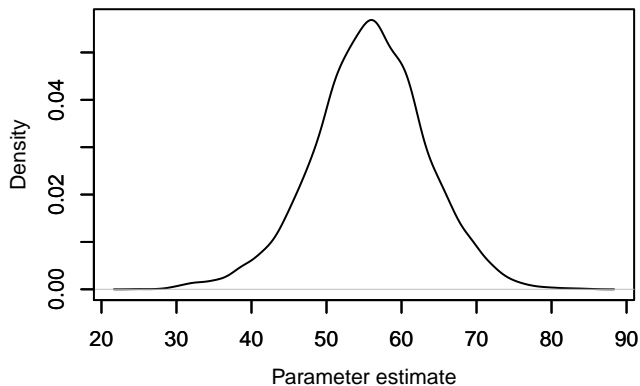

**Trace – y[7]**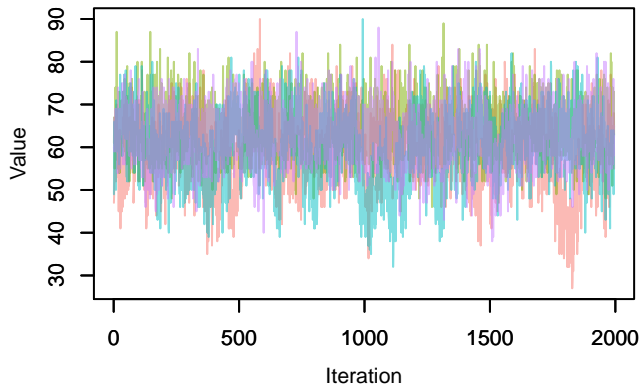**Density – y[7]**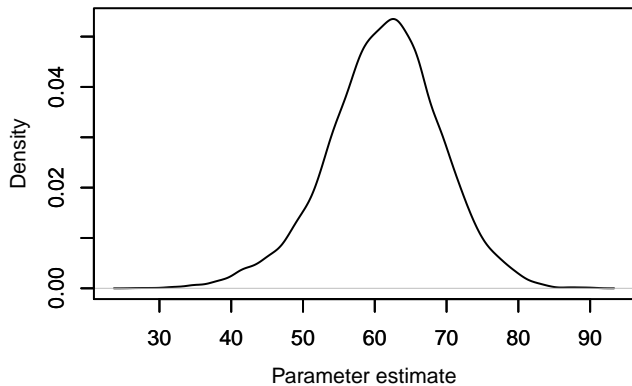**Trace – y[8]**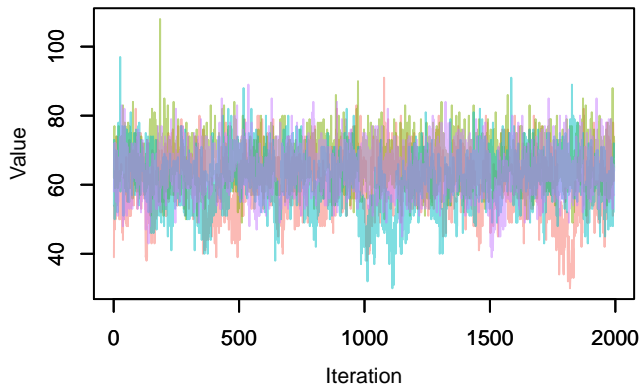**Density – y[8]**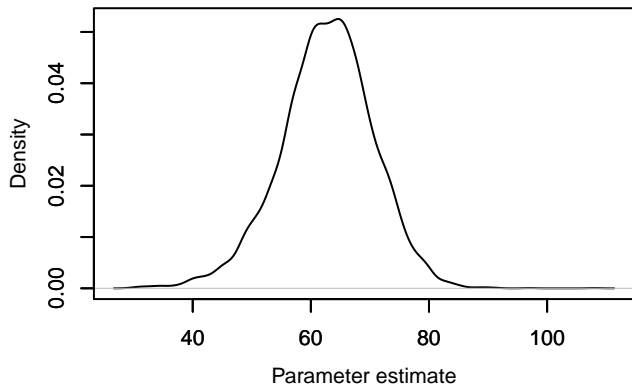**Trace – y[9]**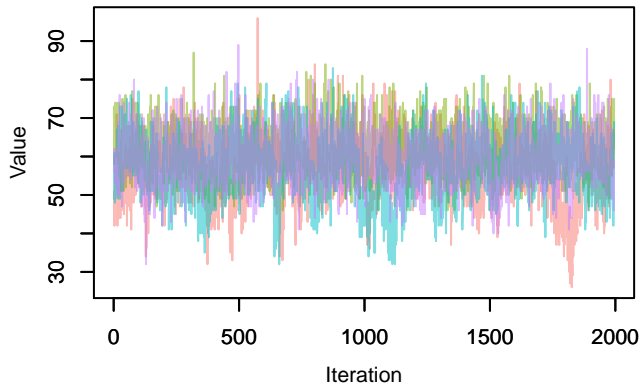**Density – y[9]**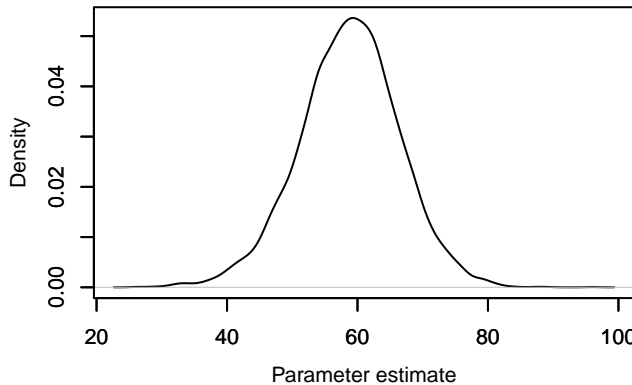

**Trace – y[10]**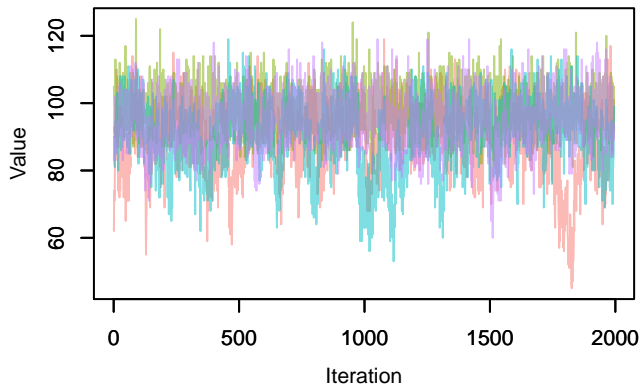**Density – y[10]**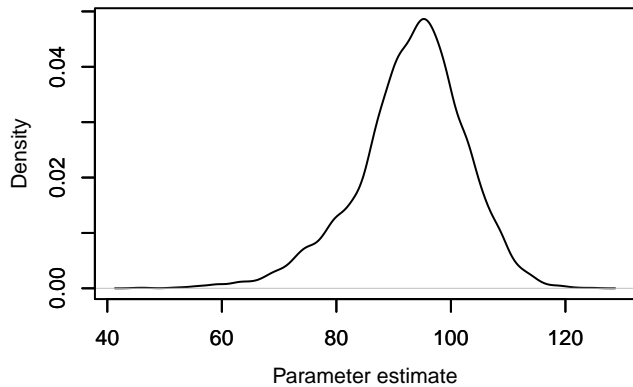**Trace – y[11]**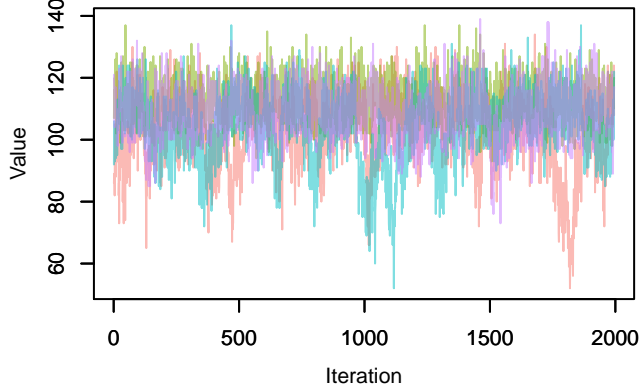**Density – y[11]**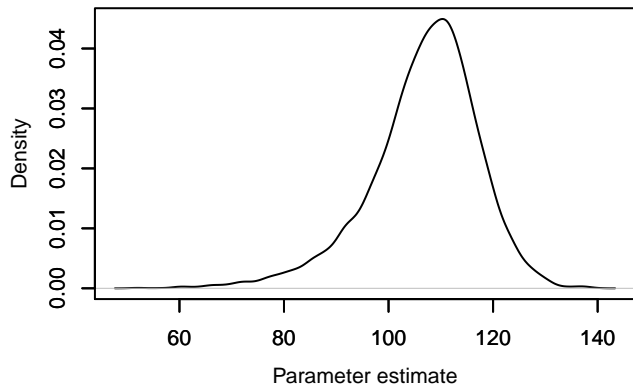**Trace – y[12]**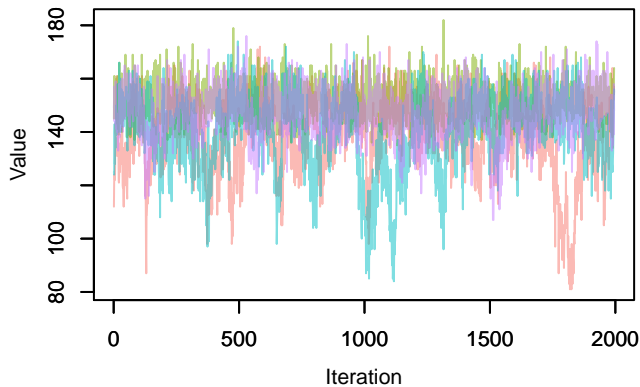**Density – y[12]**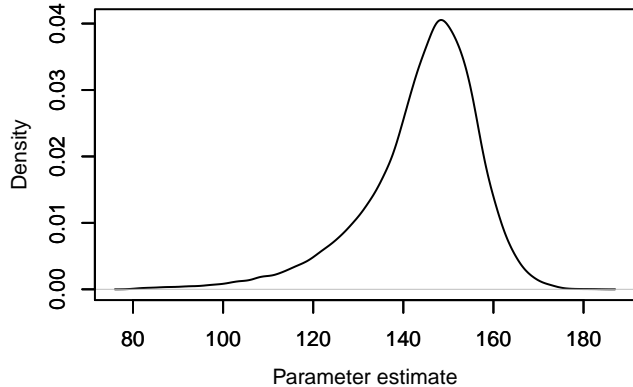

**Trace – y[13]**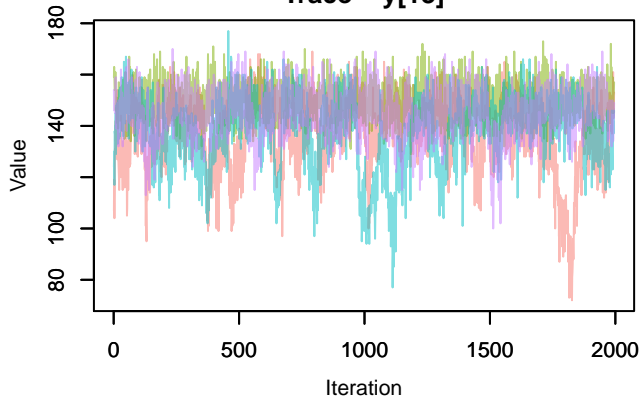**Density – y[13]**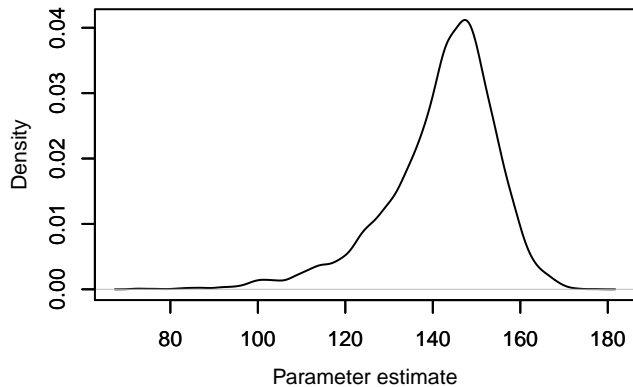**Trace – y[14]**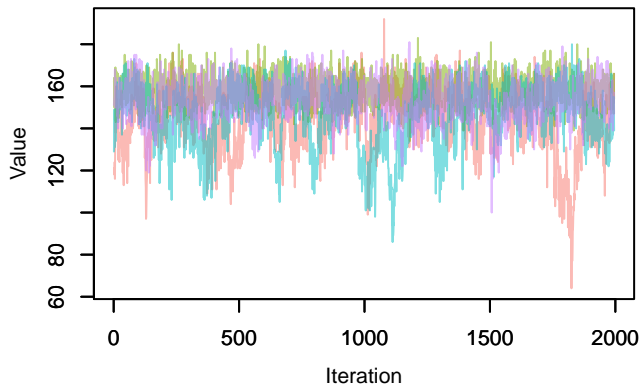**Density – y[14]**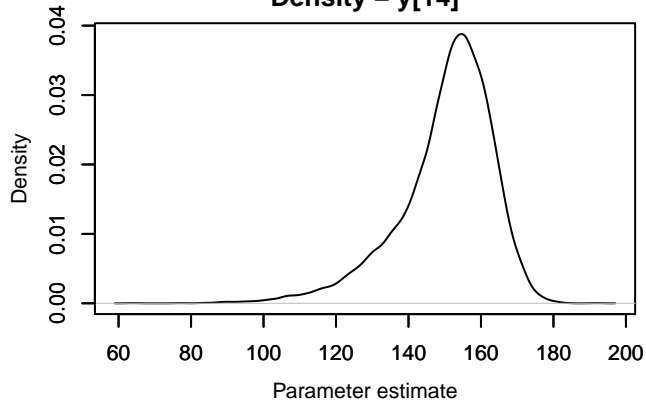**Trace – y[15]**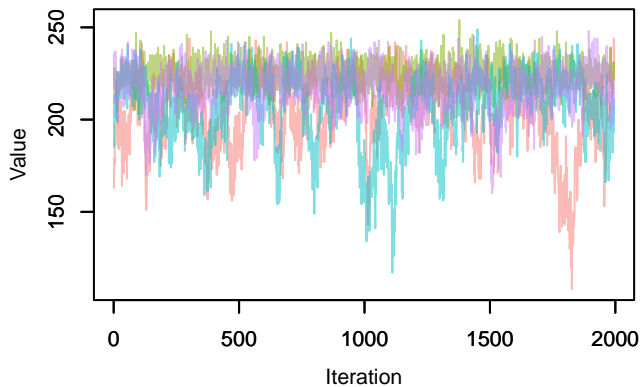**Density – y[15]**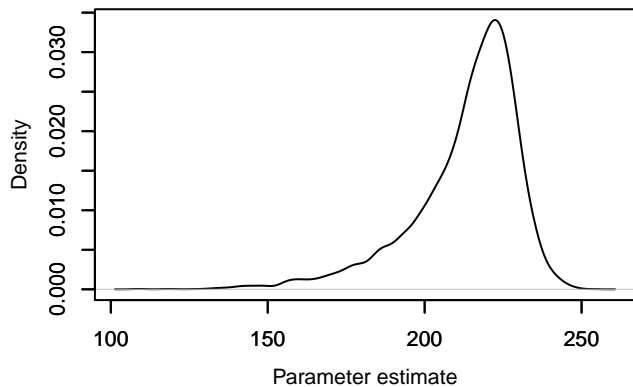

**Trace – y[16]**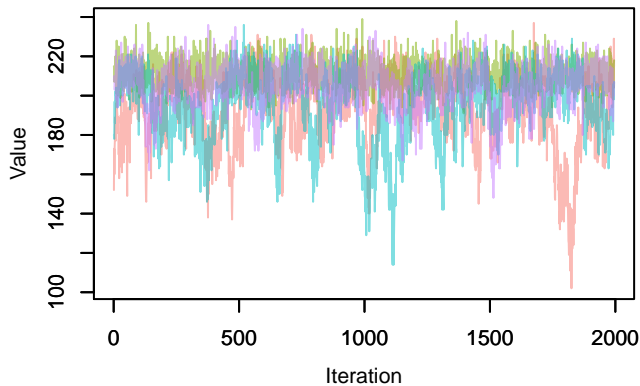**Density – y[16]**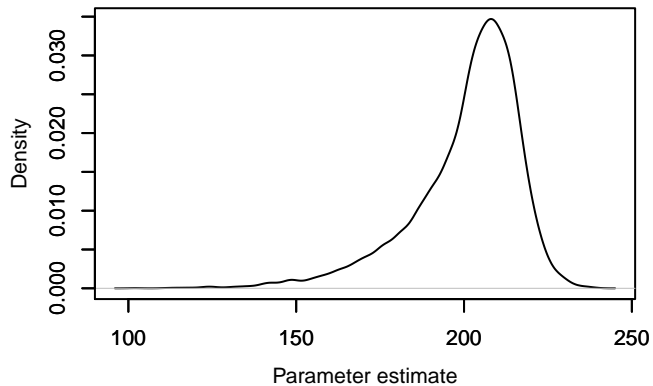**Trace – y[17]**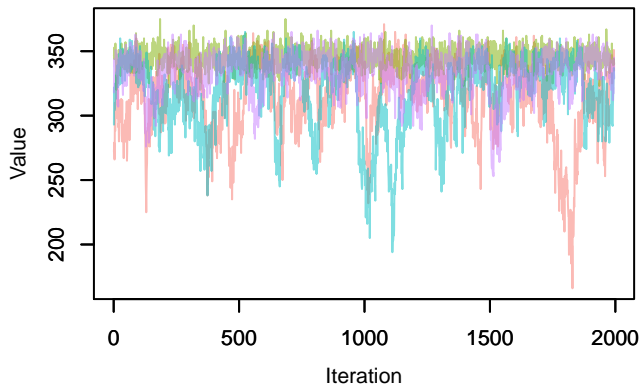**Density – y[17]**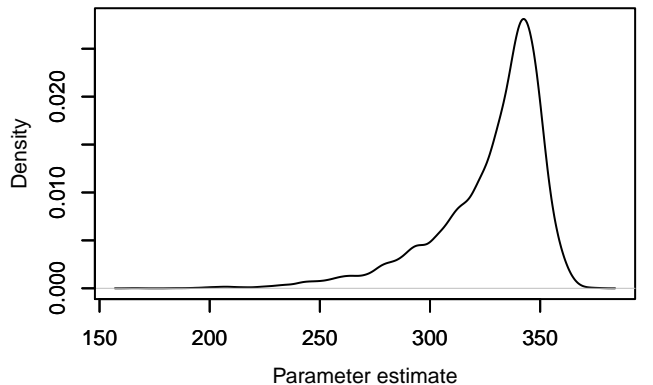**Trace – y[18]**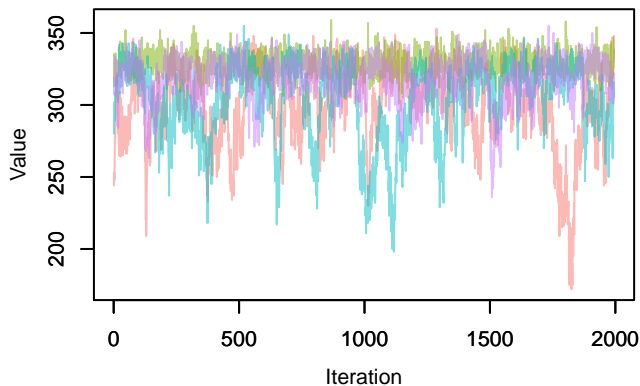**Density – y[18]**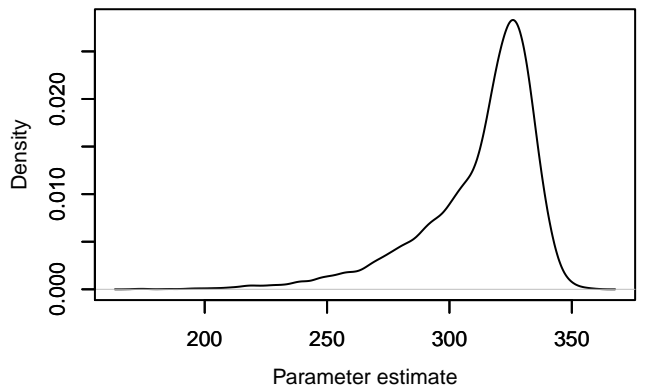



**Trace – y[19]**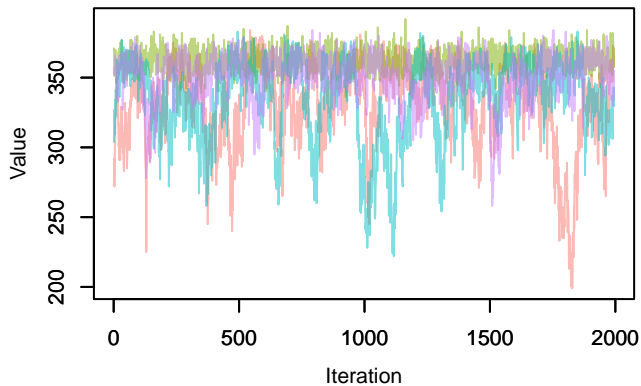**Density – y[19]**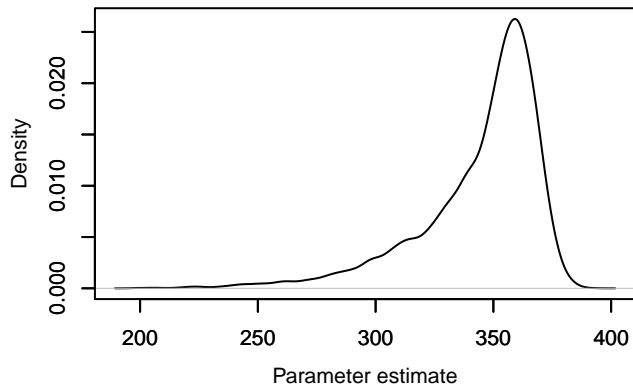**Trace – y[20]**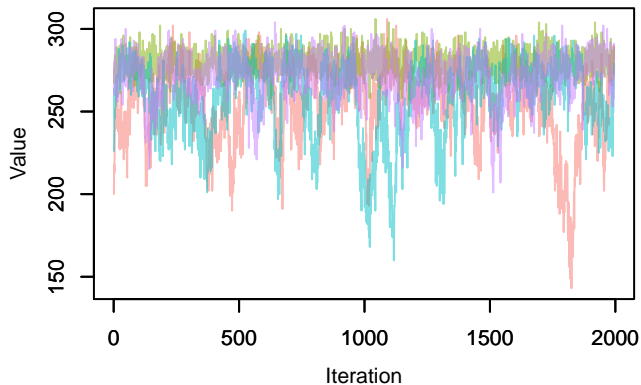**Density – y[20]**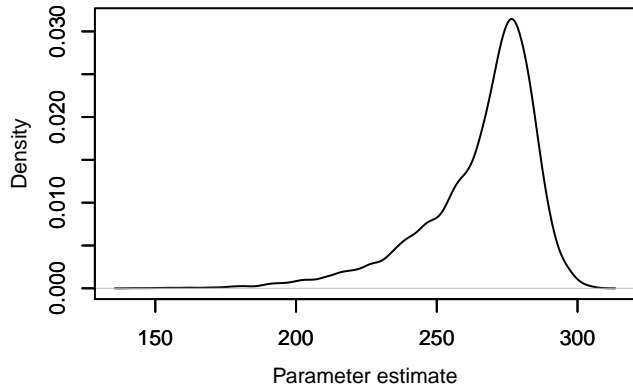**Trace – y[21]**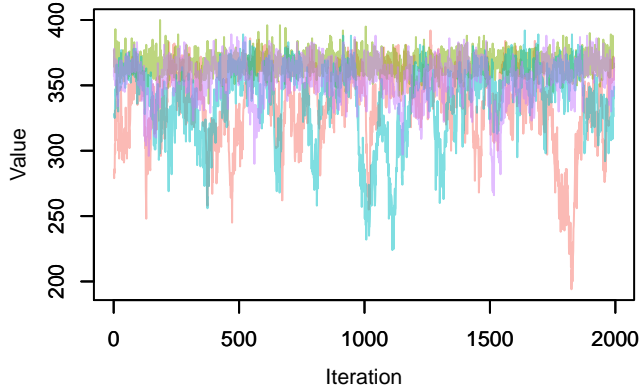**Density – y[21]**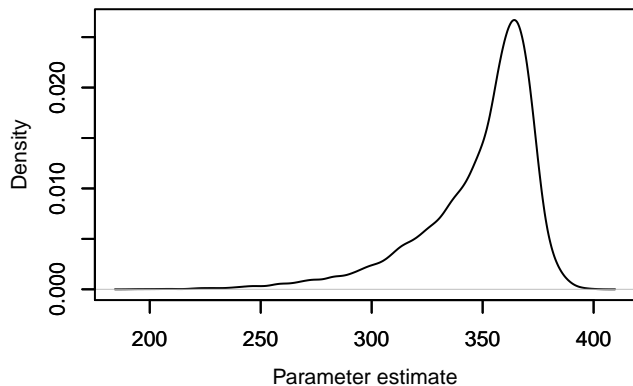

**Trace – y[22]**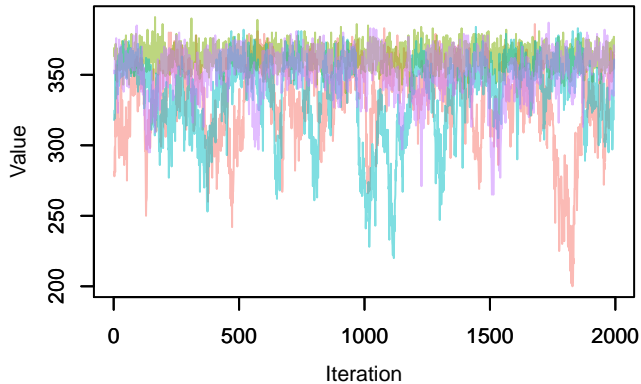**Density – y[22]**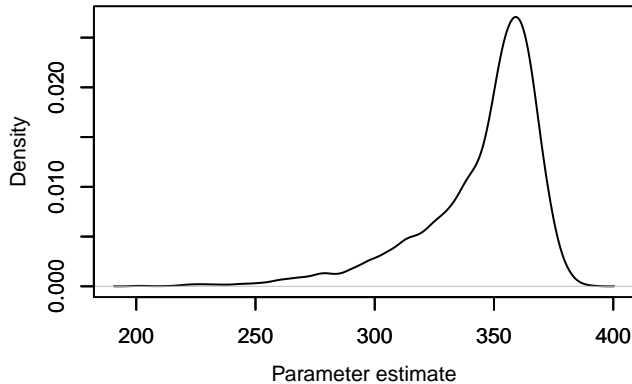**Trace – y[23]**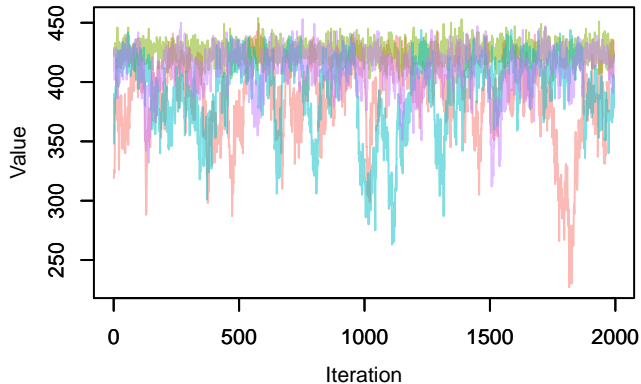**Density – y[23]**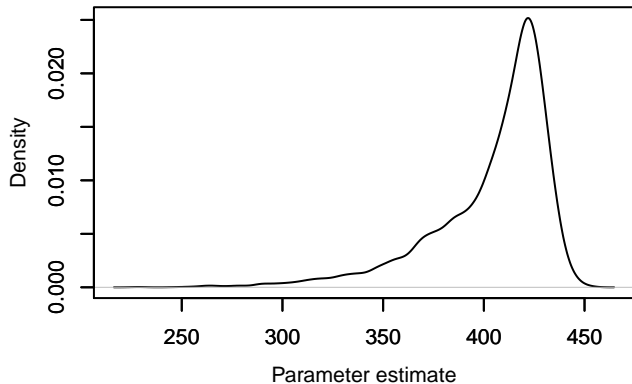**Trace – y[24]**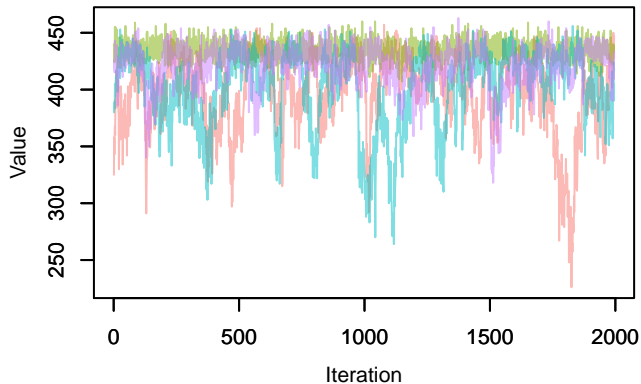**Density – y[24]**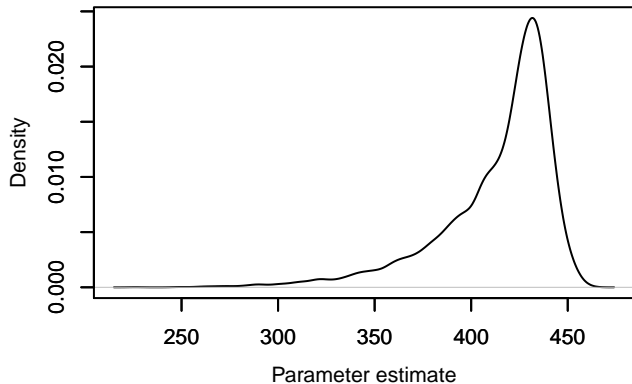

**Trace – y[25]**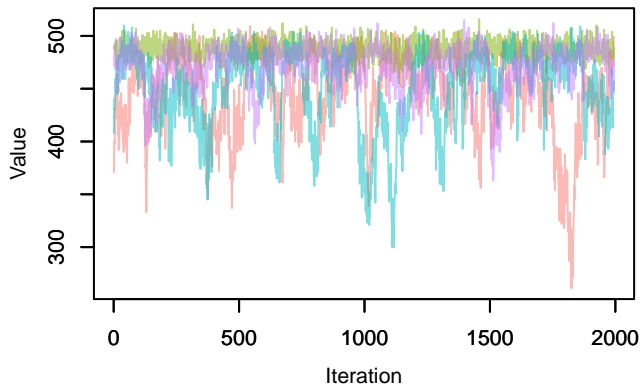**Density – y[25]**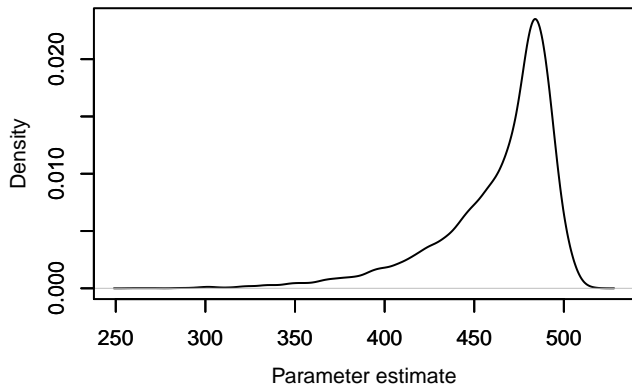**Trace – y[26]**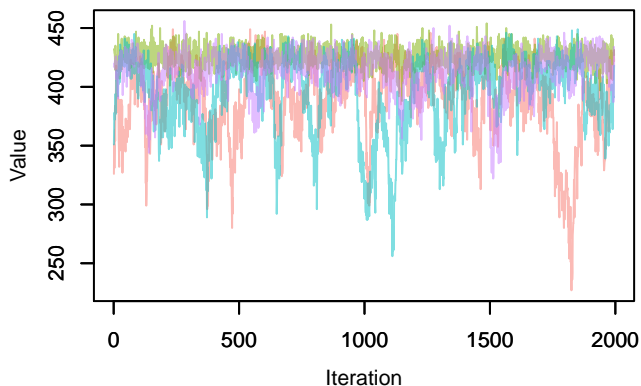**Density – y[26]**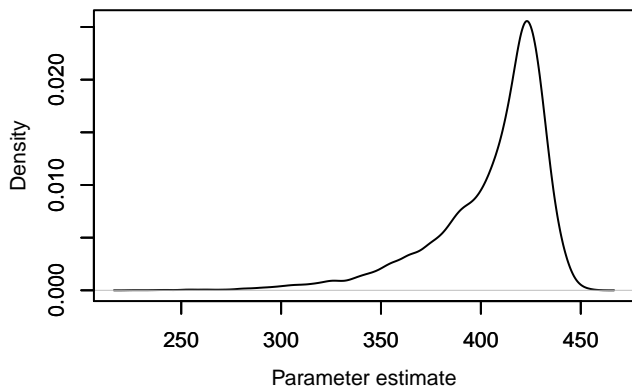**Trace – y[27]**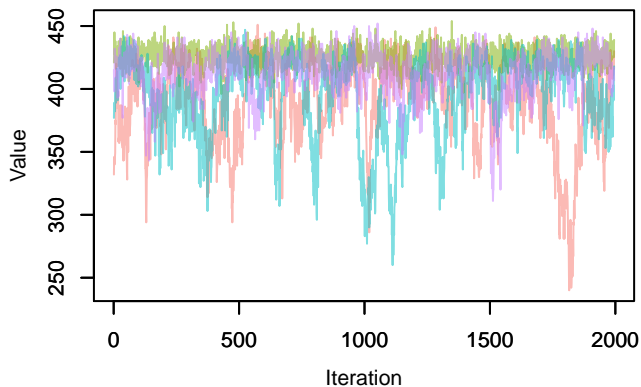**Density – y[27]**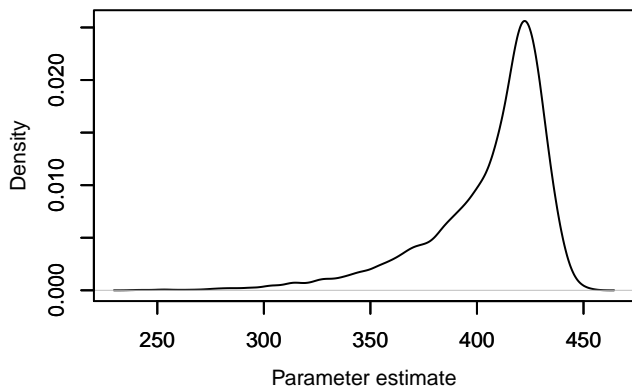

**Trace – y[28]**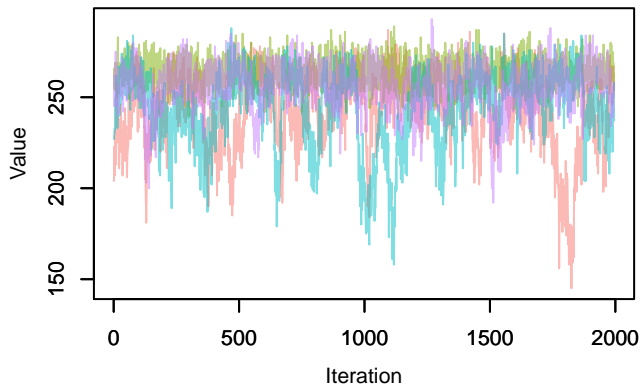**Density – y[28]**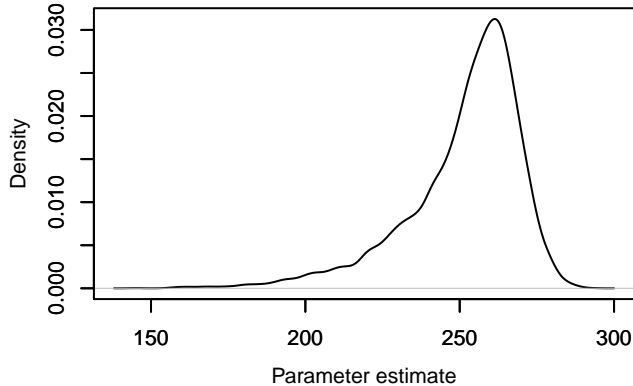**Trace – y[29]**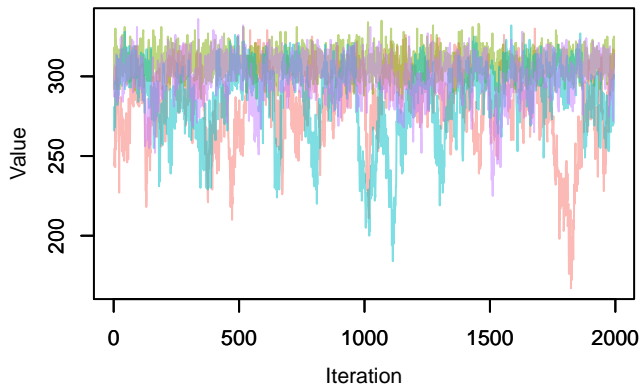**Density – y[29]**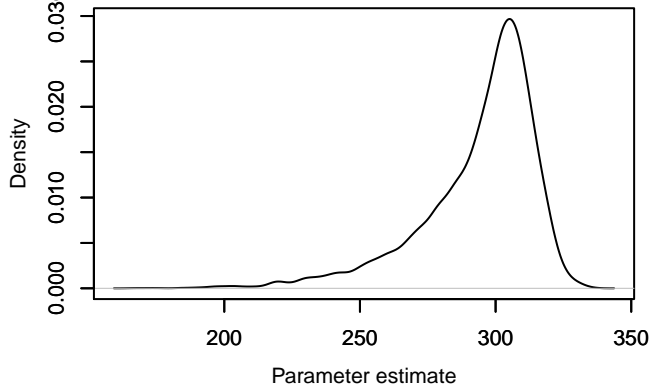**Trace – y[30]**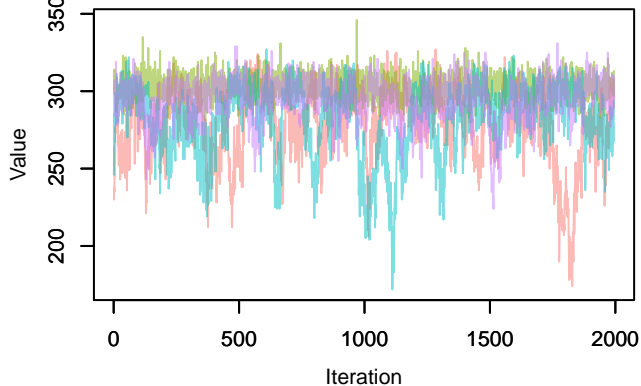**Density – y[30]**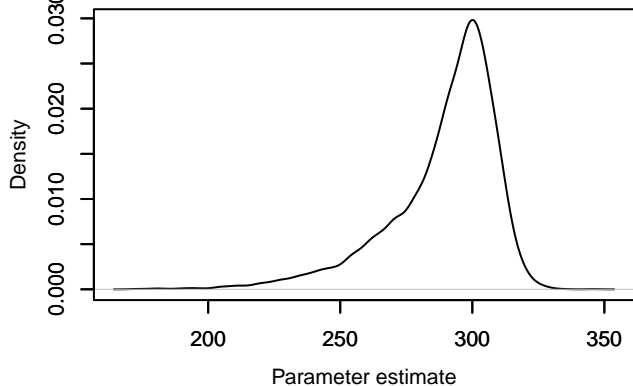

**Trace – y[31]**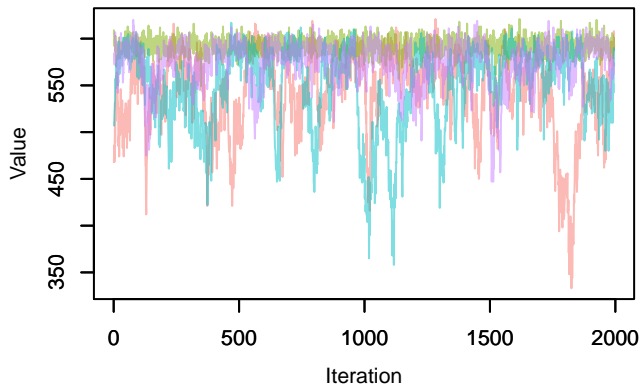**Density – y[31]**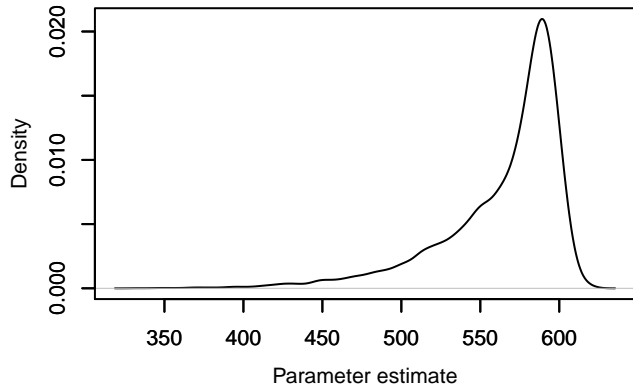**Trace – y[32]**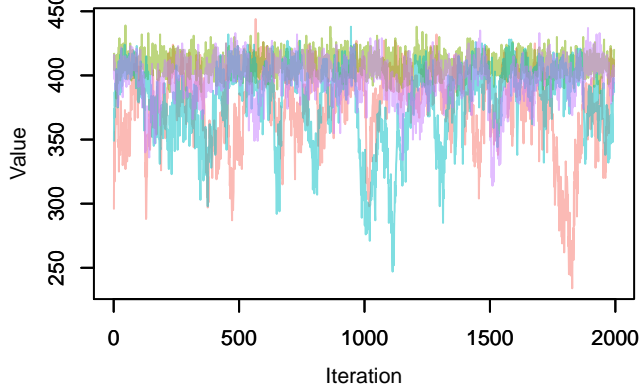**Density – y[32]**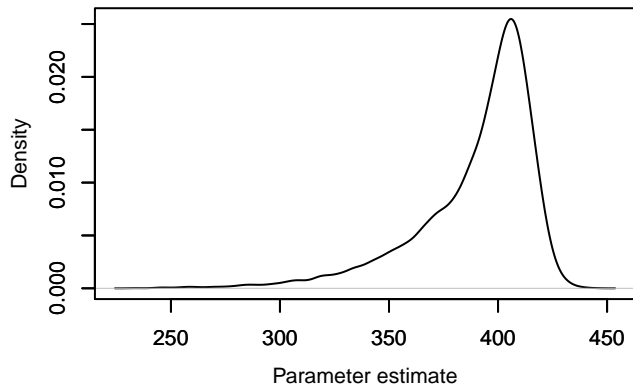**Trace – y[33]**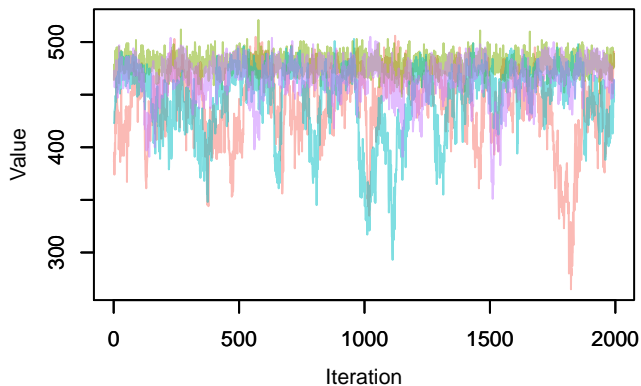**Density – y[33]**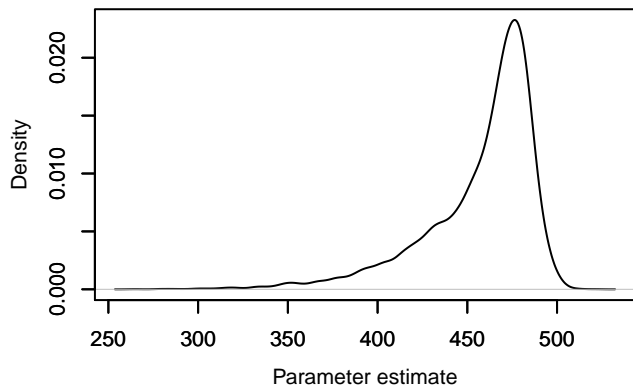

**Trace – y[34]**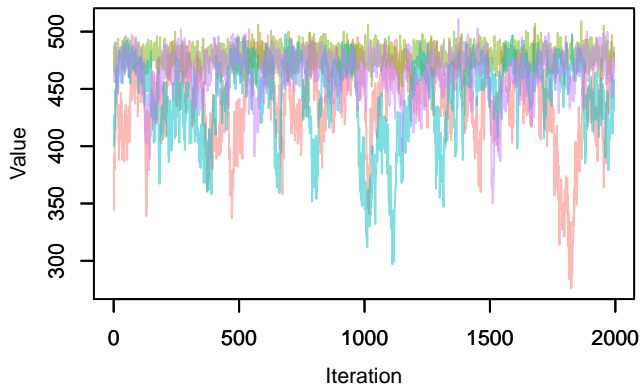**Density – y[34]**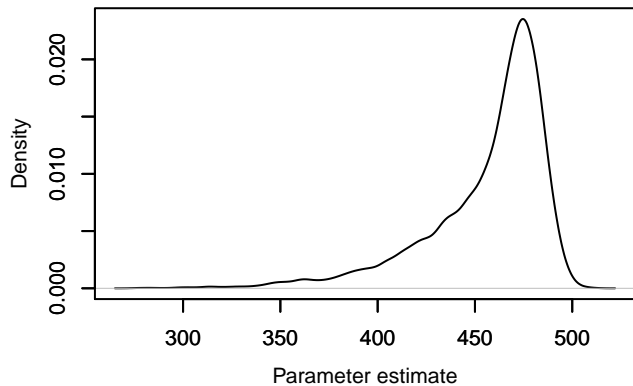**Trace – y[35]**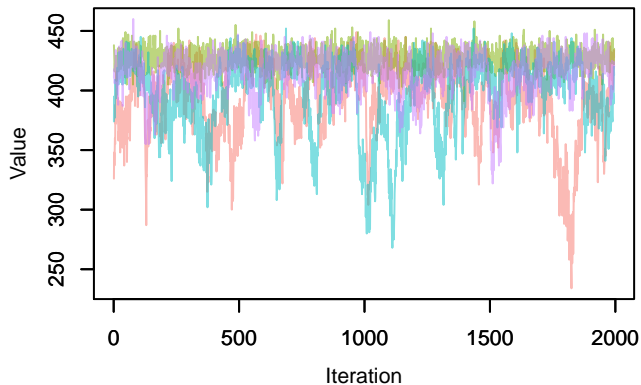**Density – y[35]**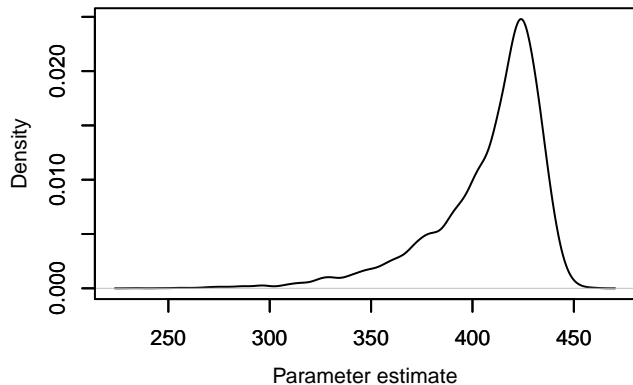**Trace – y[36]**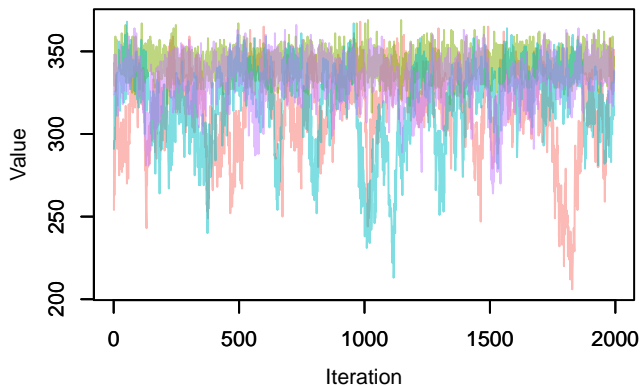**Density – y[36]**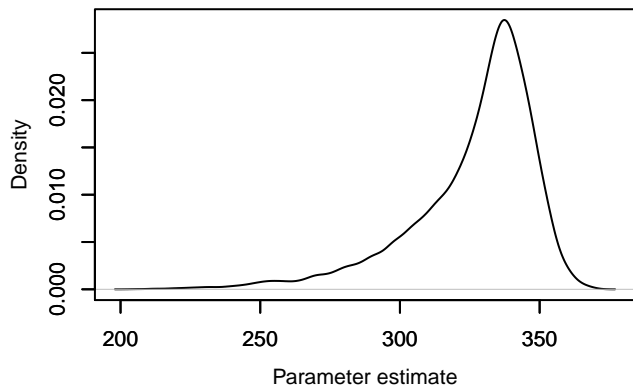

**Trace – y[37]**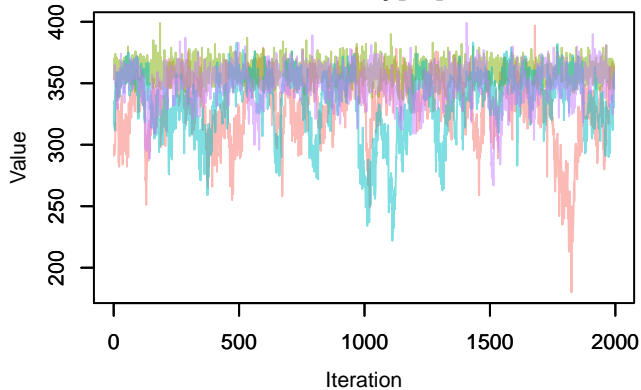**Density – y[37]**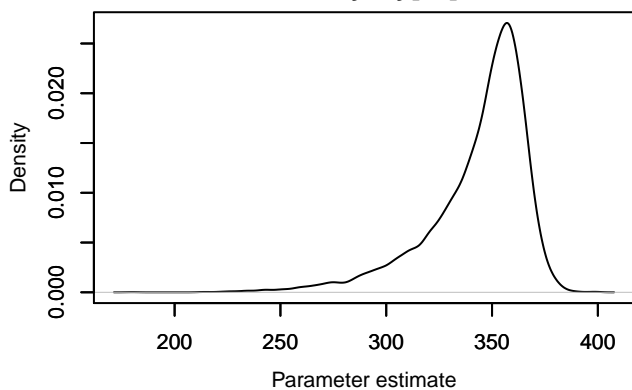**Trace – y[38]**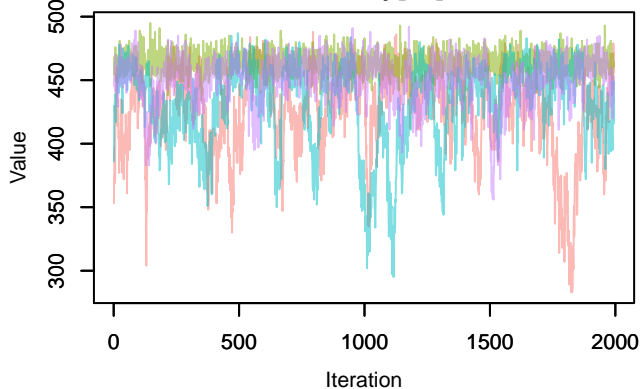**Density – y[38]**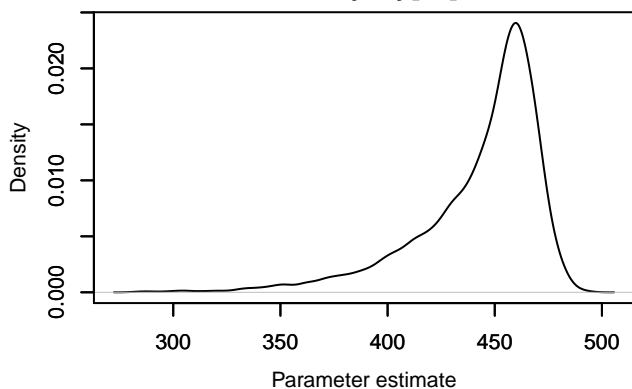**Trace – y[39]**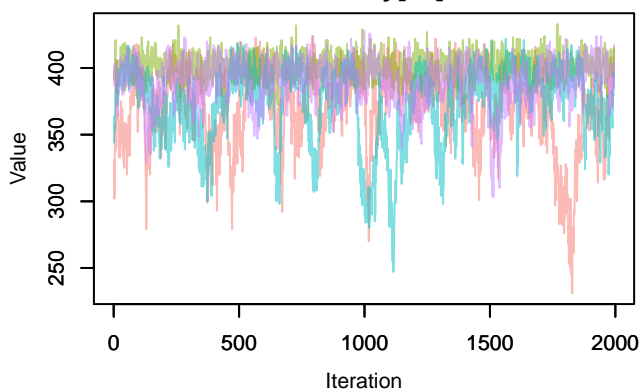**Density – y[39]**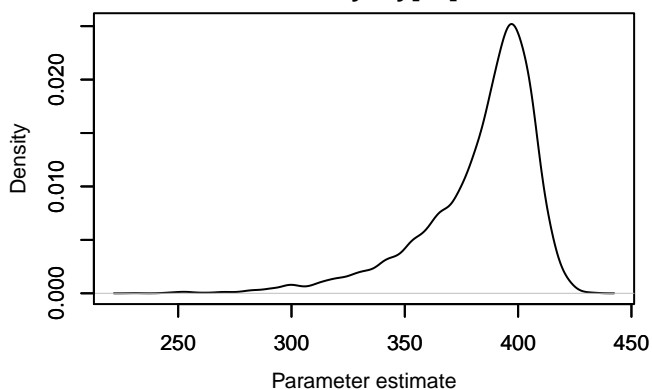

**Trace – y[40]**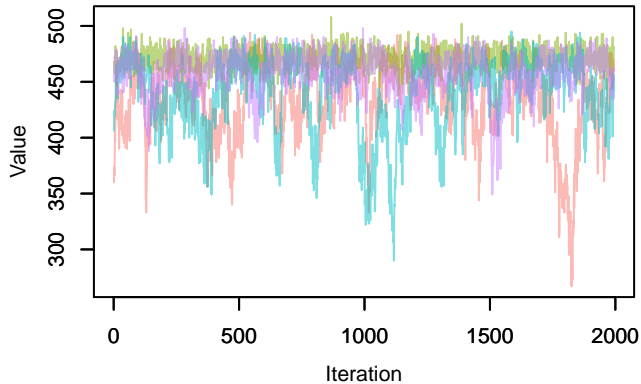**Density – y[40]**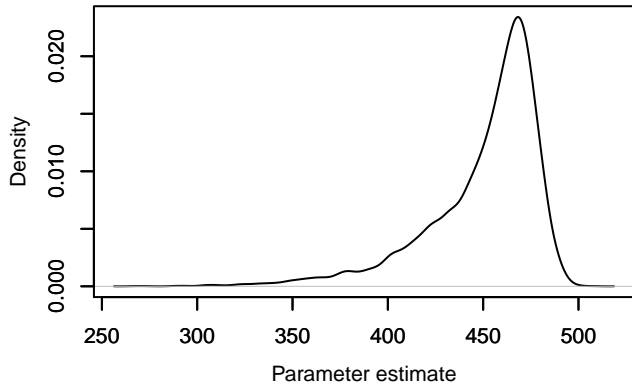**Trace – y[41]**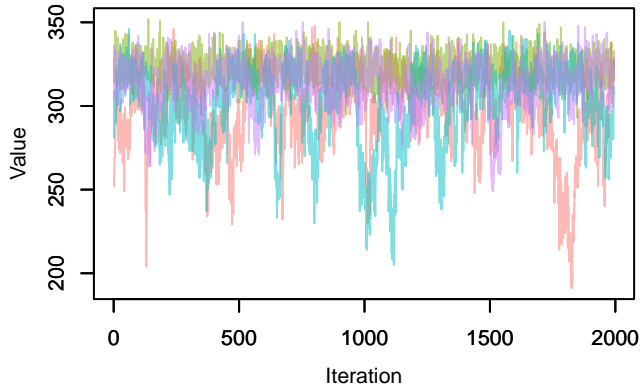**Density – y[41]**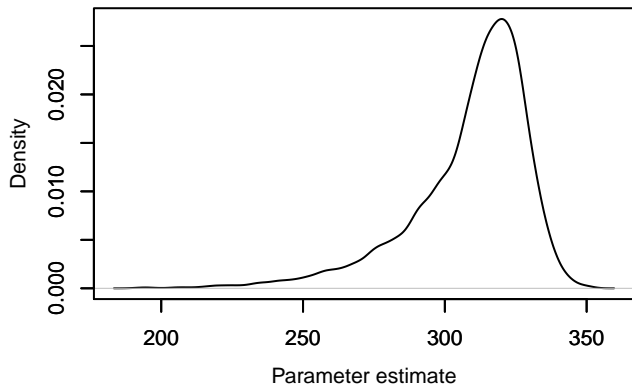**Trace – y[42]**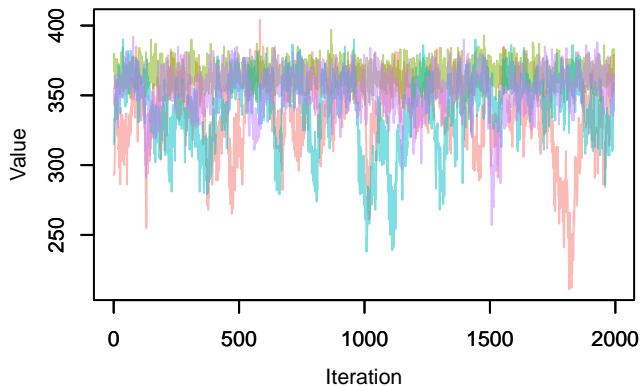**Density – y[42]**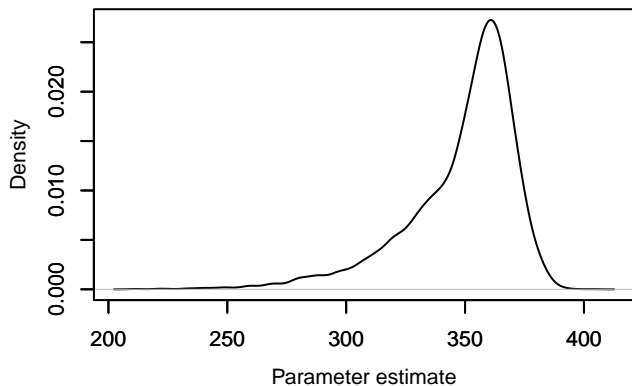



**Trace – y[43]**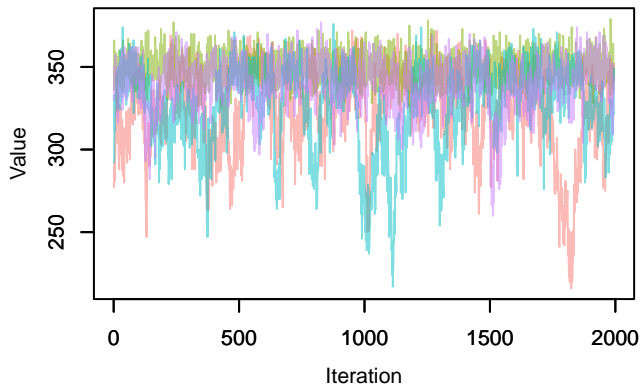**Density – y[43]**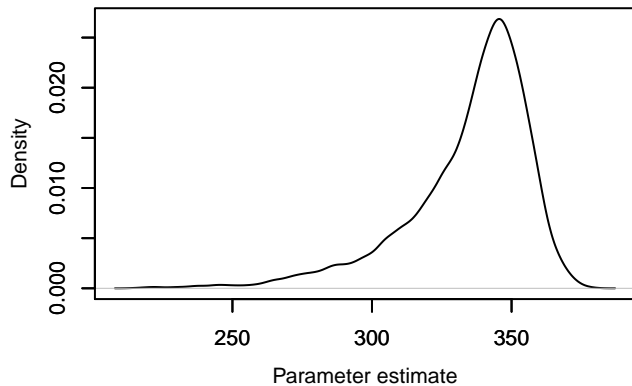**Trace – y[44]**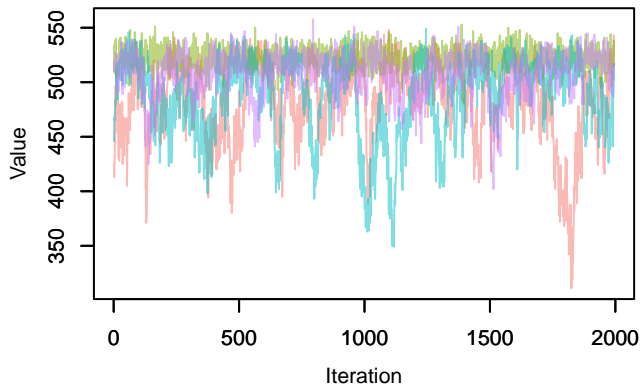**Density – y[44]**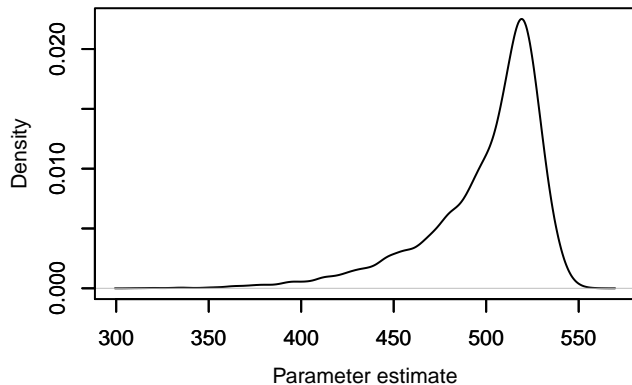**Trace – y[45]**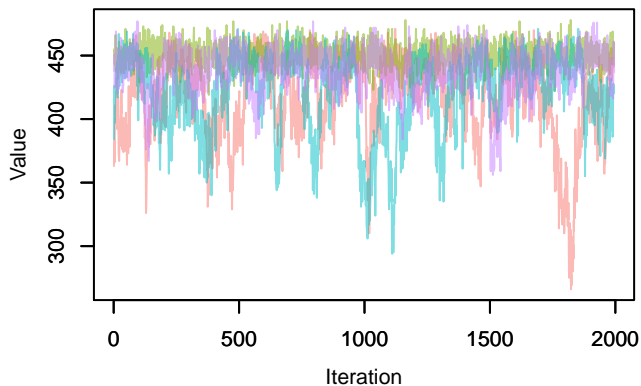**Density – y[45]**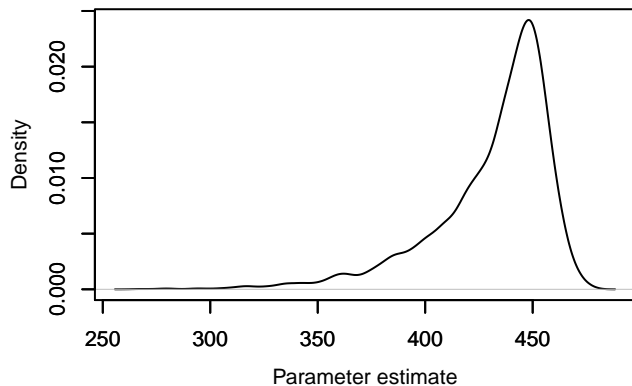

**Trace – y[46]**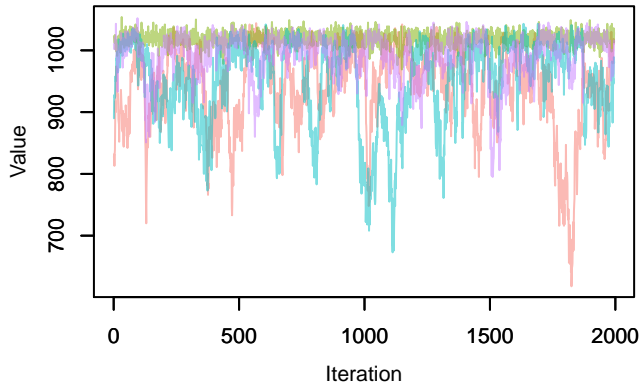**Density – y[46]**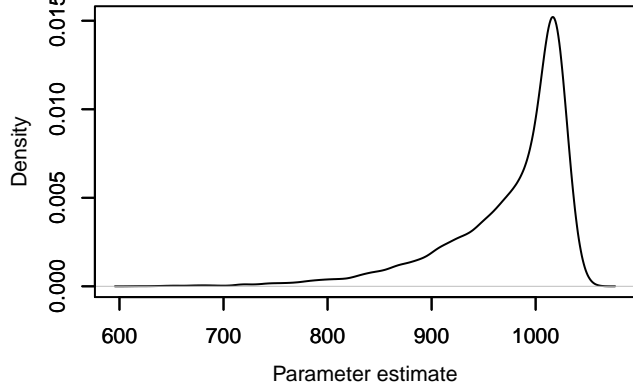**Trace – y[47]**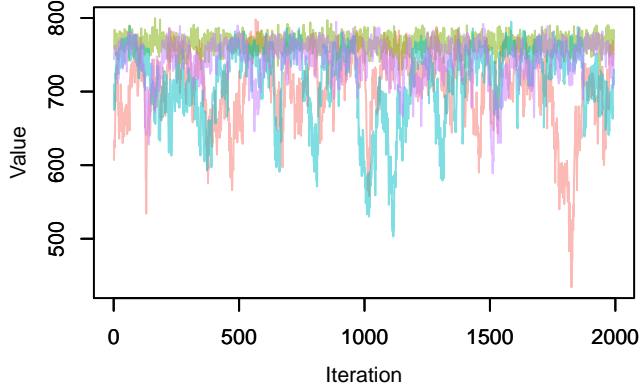**Density – y[47]**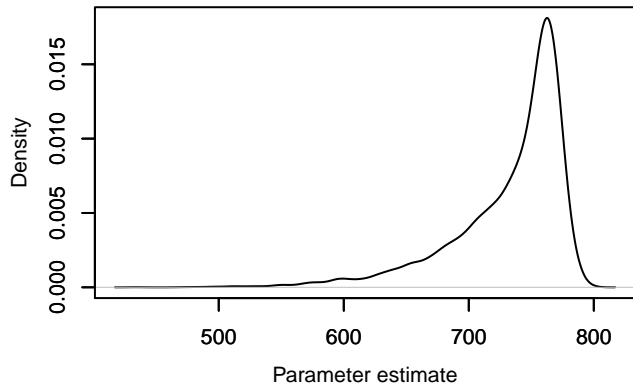**Trace – y[48]**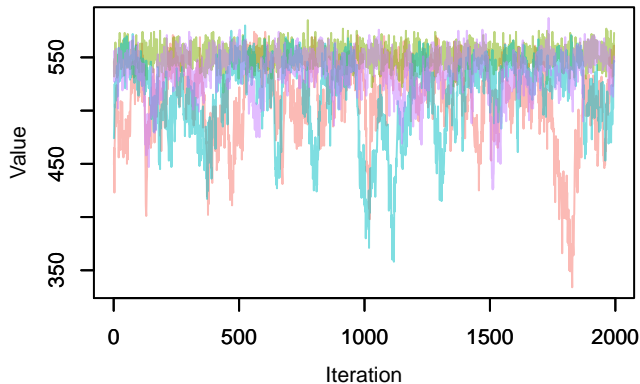**Density – y[48]**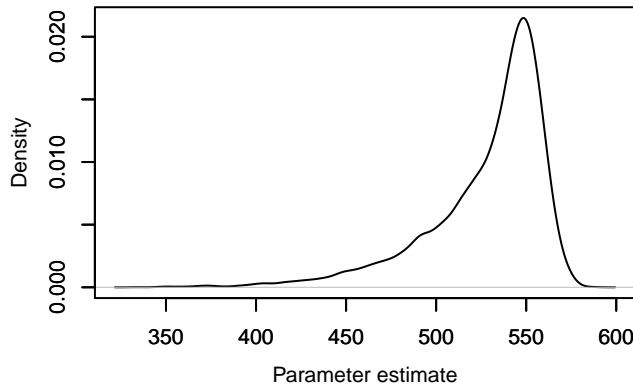

**Trace – y[49]**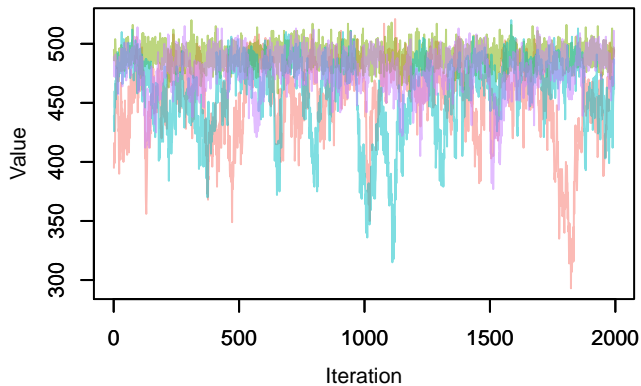**Density – y[49]**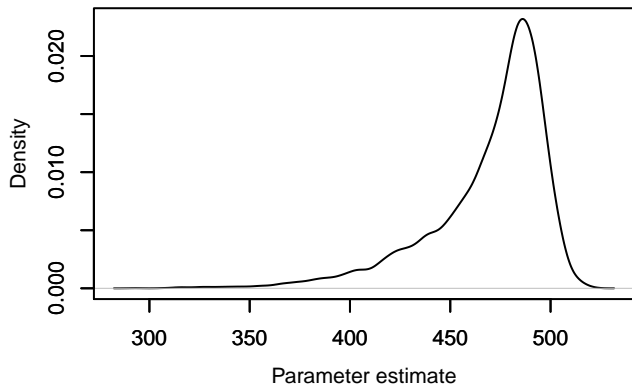**Trace – y[50]**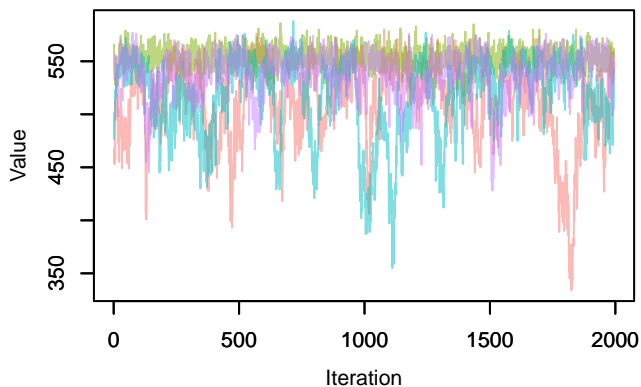**Density – y[50]**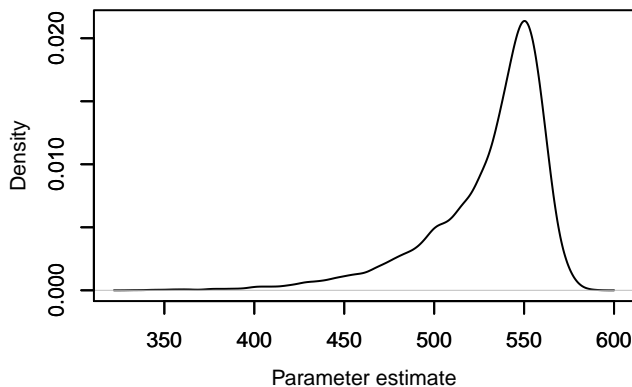**Trace – y[51]**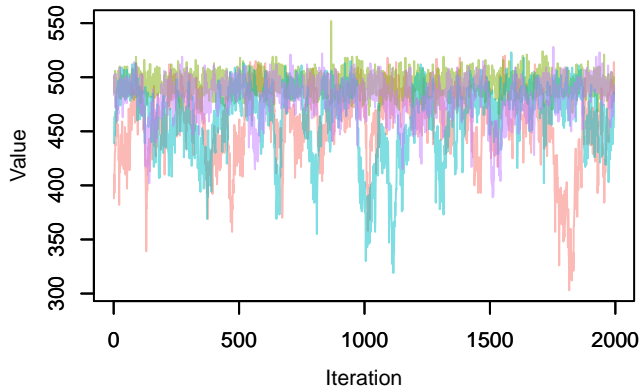**Density – y[51]**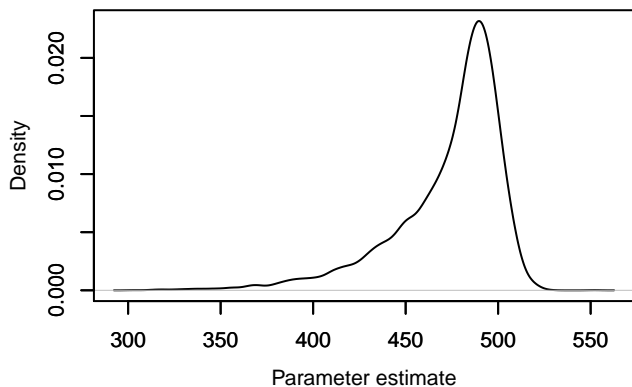

**Trace – y[52]**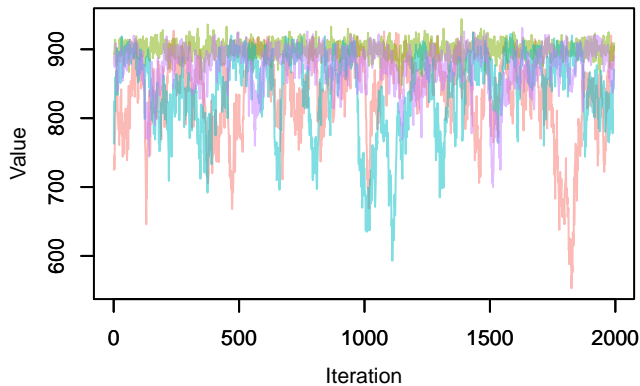**Density – y[52]**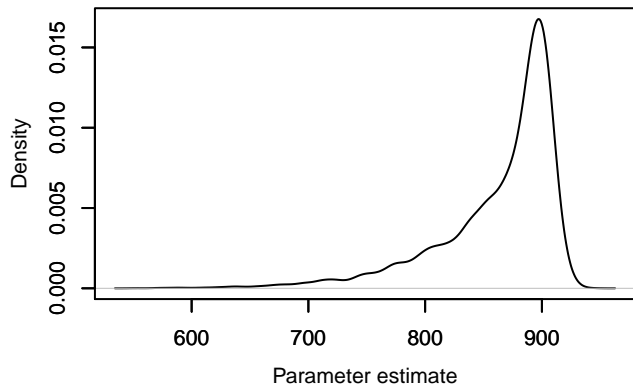**Trace – y[53]**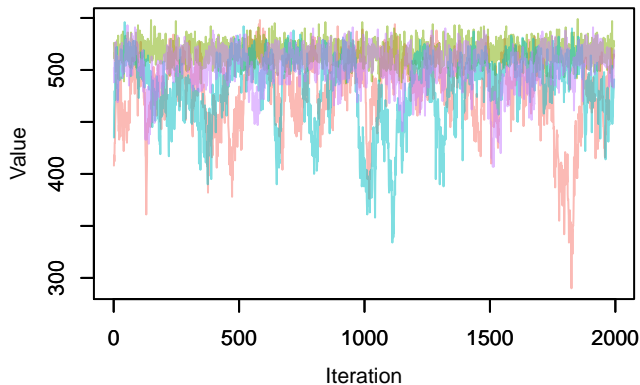**Density – y[53]**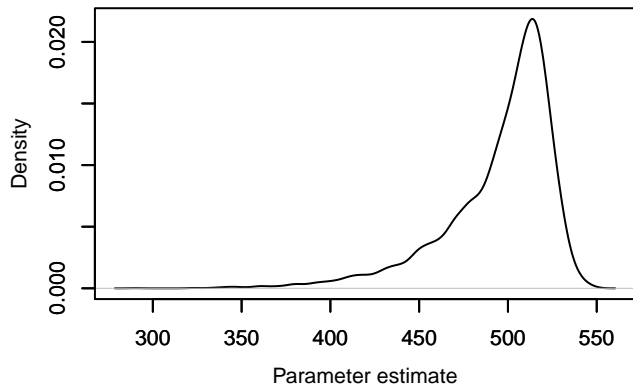**Trace – y[54]**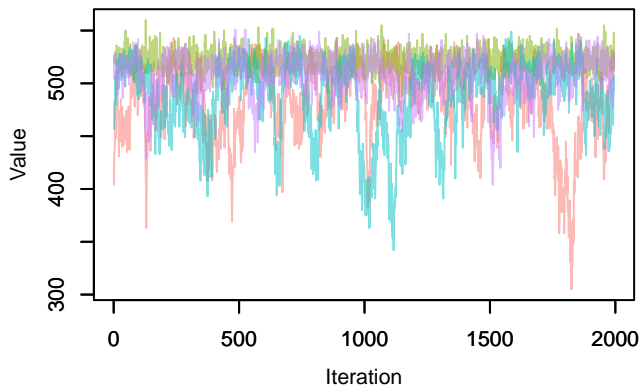**Density – y[54]**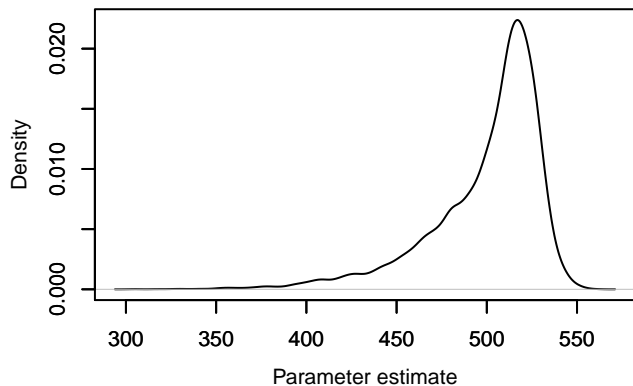

**Trace – y[55]**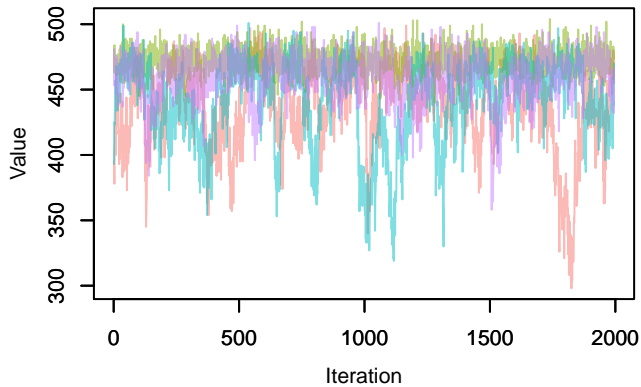**Density – y[55]**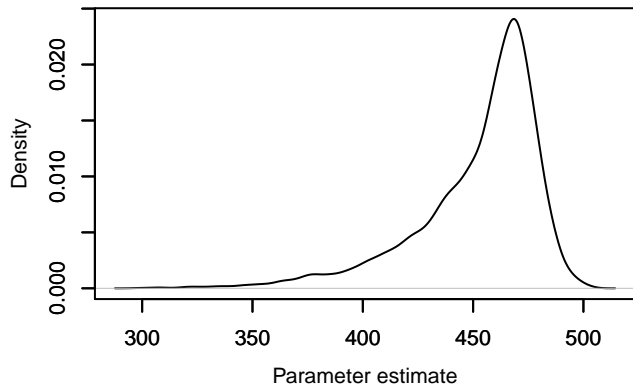**Trace – y[56]**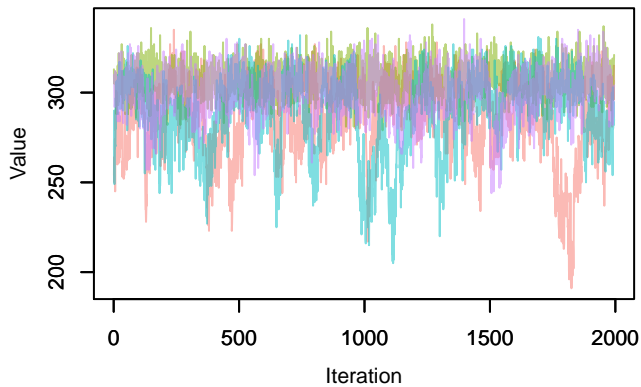**Density – y[56]**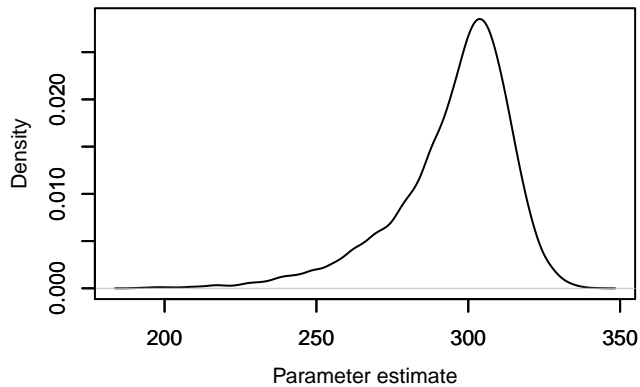**Trace – y[57]**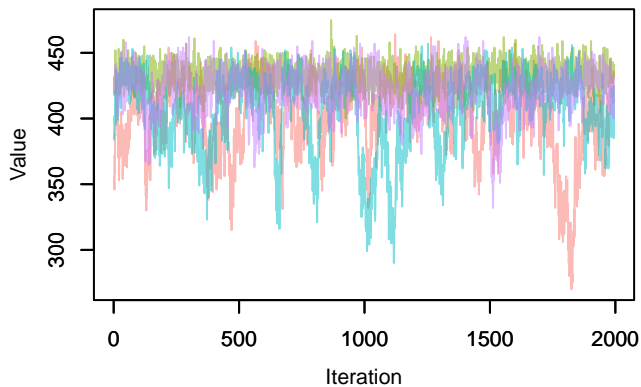**Density – y[57]**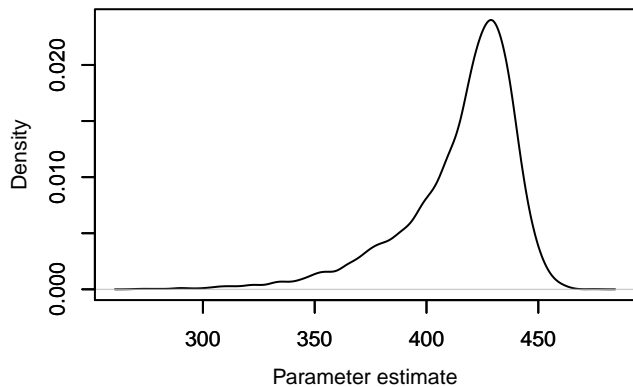

**Trace – y[58]**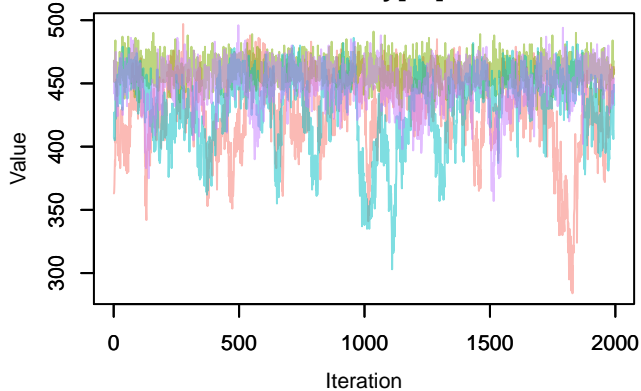**Density – y[58]**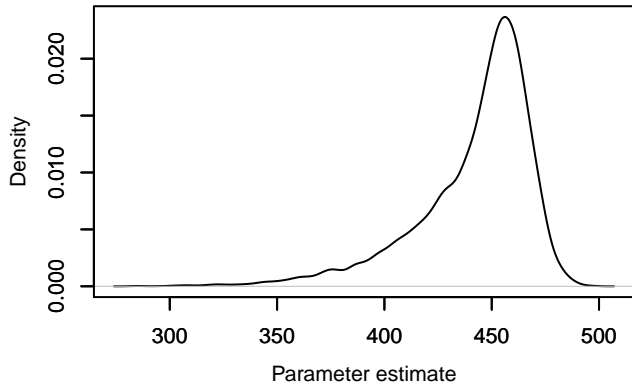**Trace – y[59]**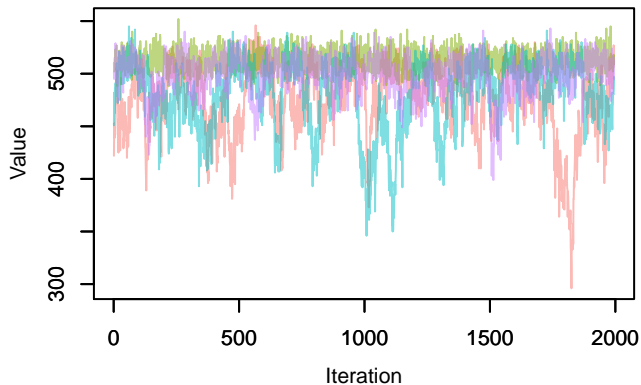**Density – y[59]**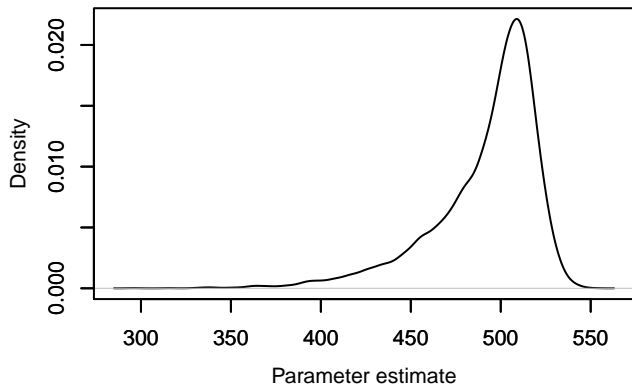**Trace – y[60]**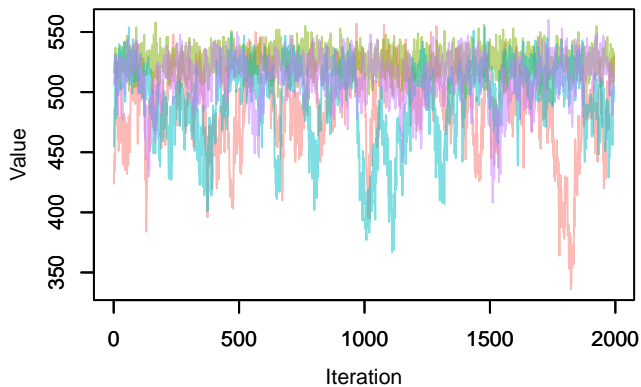**Density – y[60]**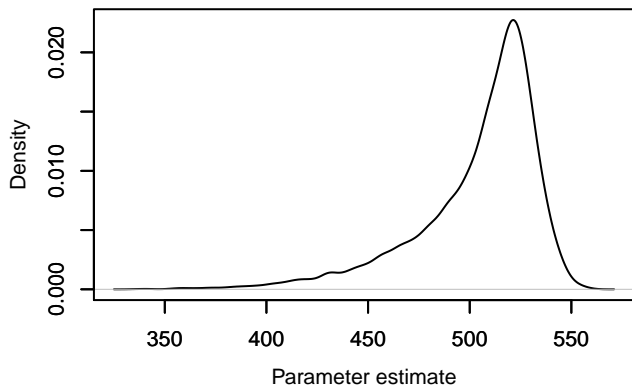

**Trace – y[61]**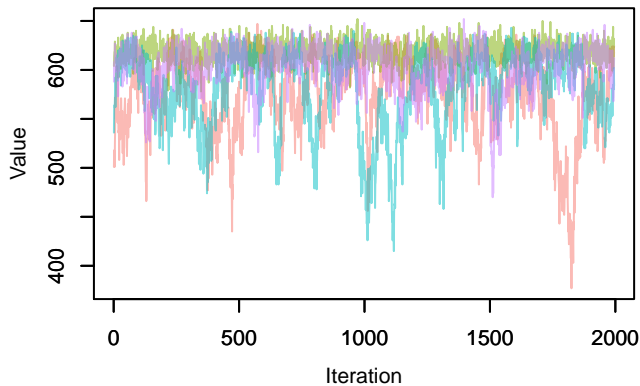**Density – y[61]**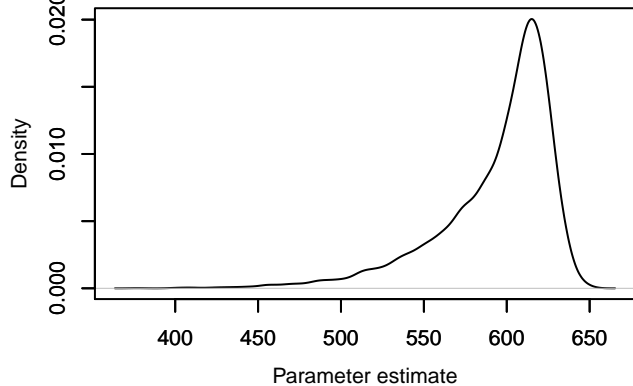**Trace – y[62]**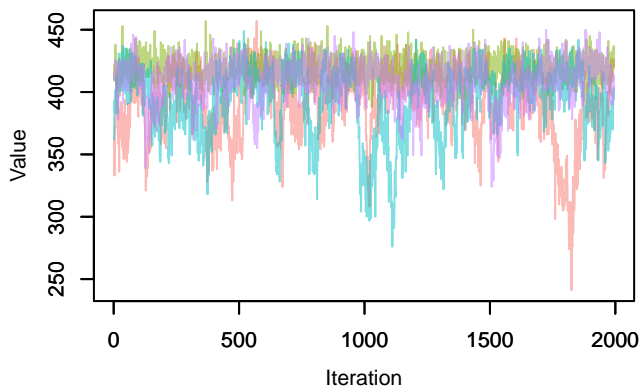**Density – y[62]**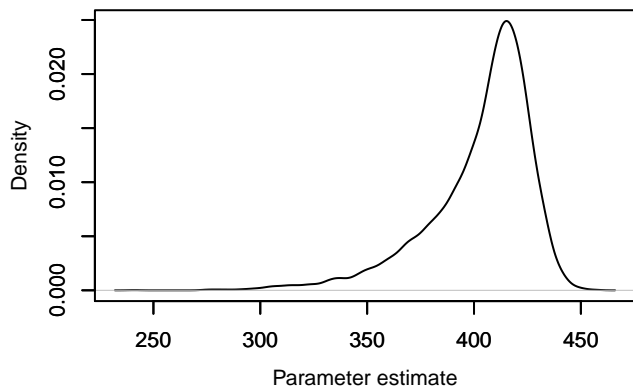**Trace – y[63]**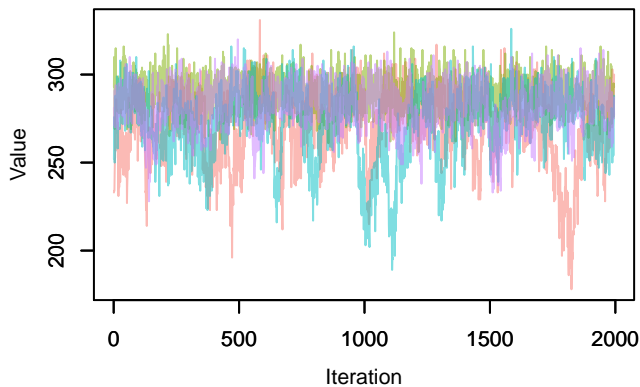**Density – y[63]**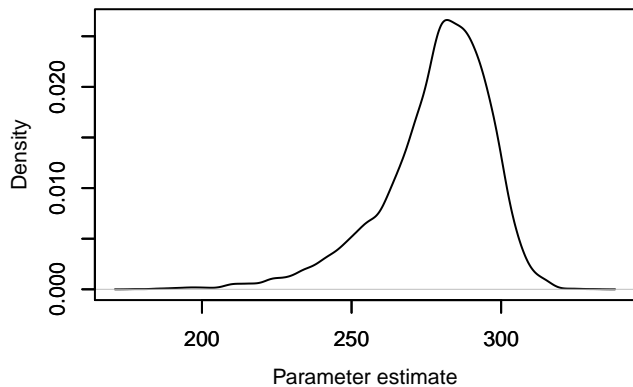

**Trace – y[64]**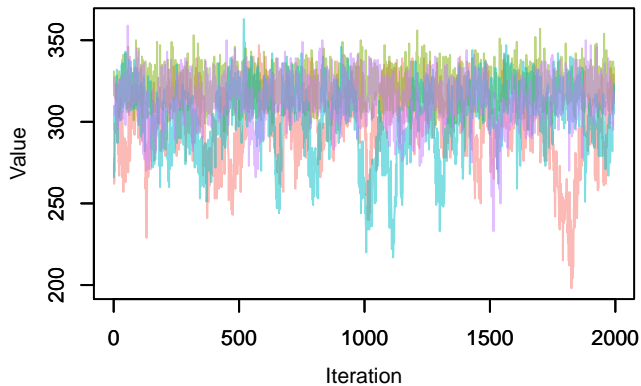**Density – y[64]**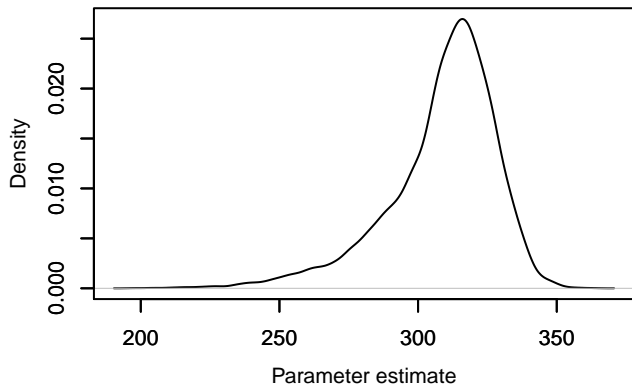**Trace – y[65]**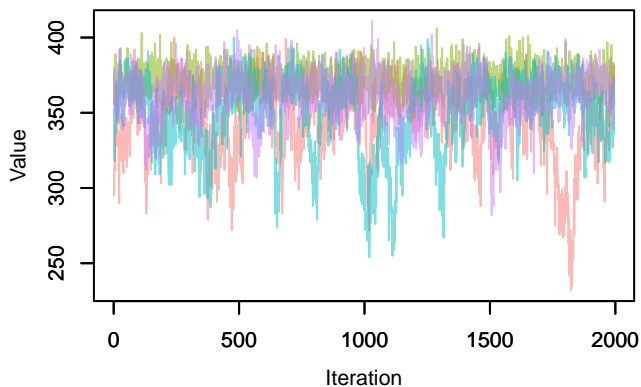**Density – y[65]**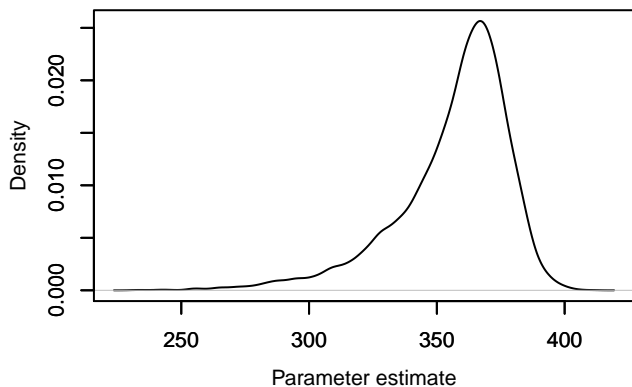**Trace – y[66]**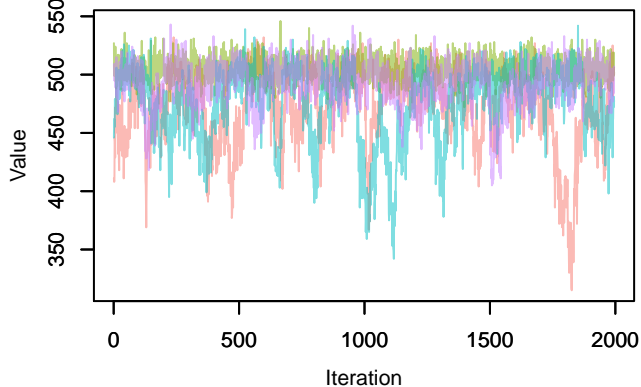**Density – y[66]**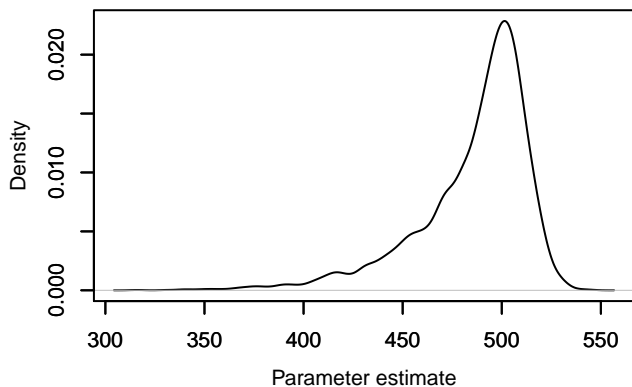



**Trace – y[67]**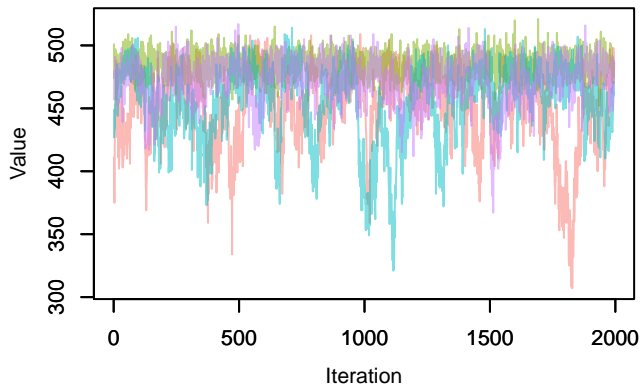**Density – y[67]**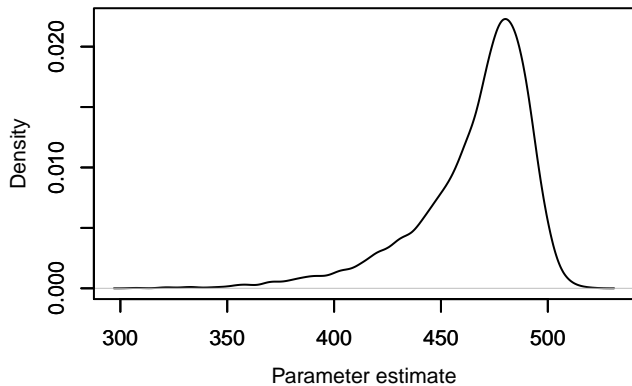**Trace – y[68]**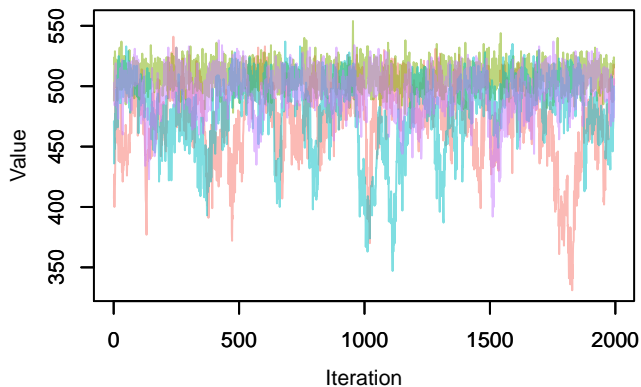**Density – y[68]**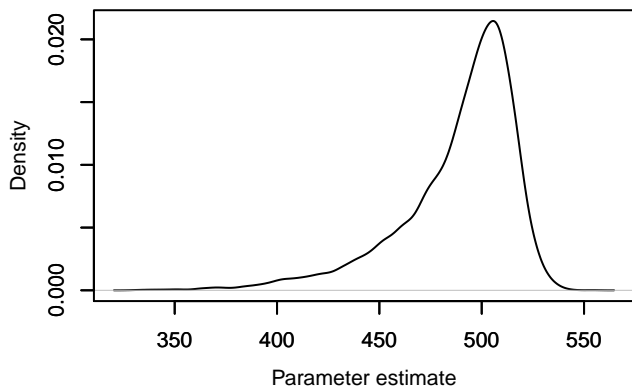**Trace – y[69]**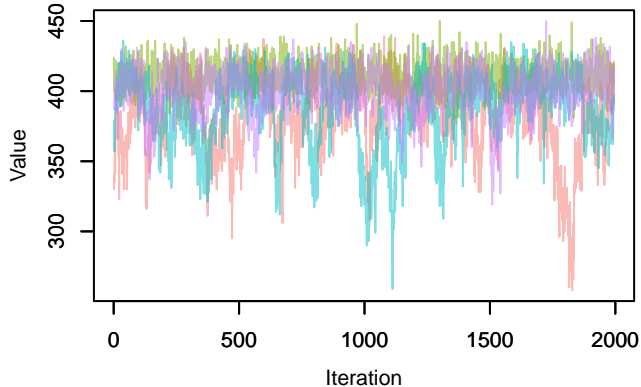**Density – y[69]**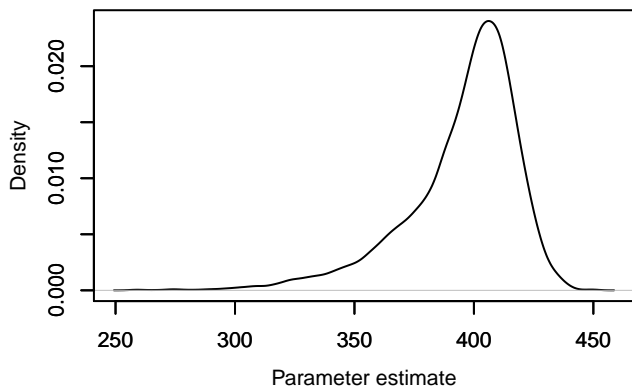

**Trace – y[70]**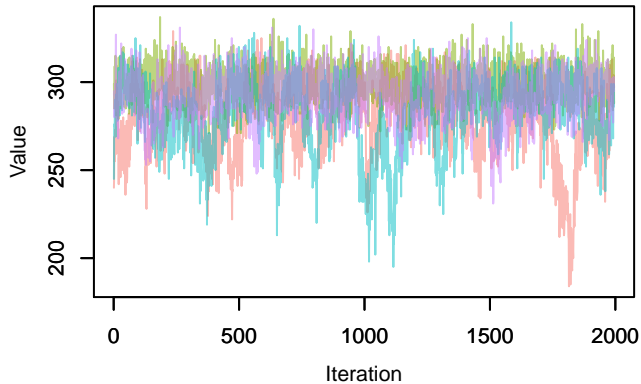**Density – y[70]**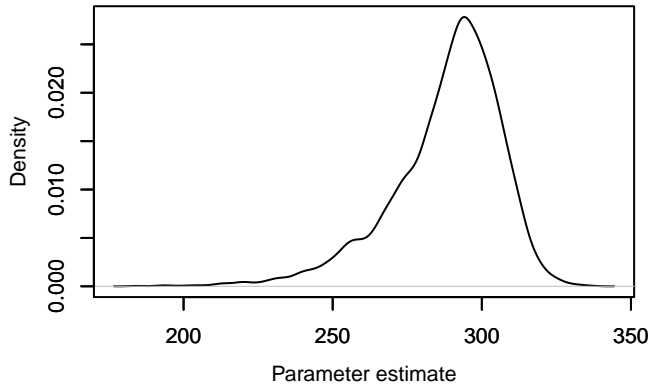**Trace – y[71]**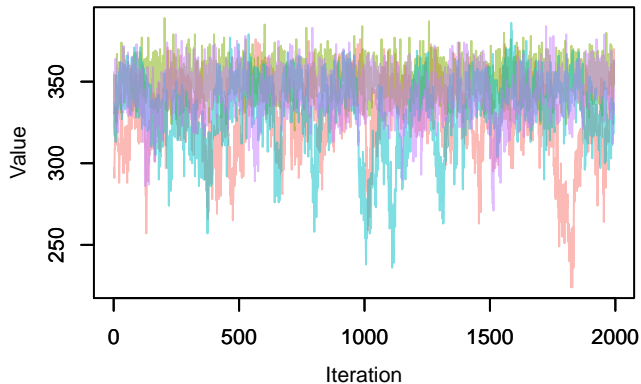**Density – y[71]**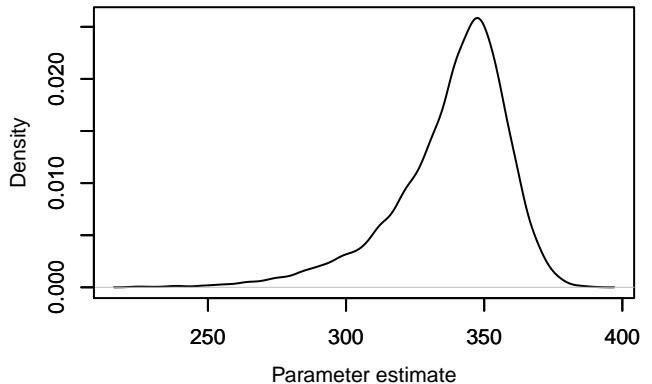**Trace – y[72]**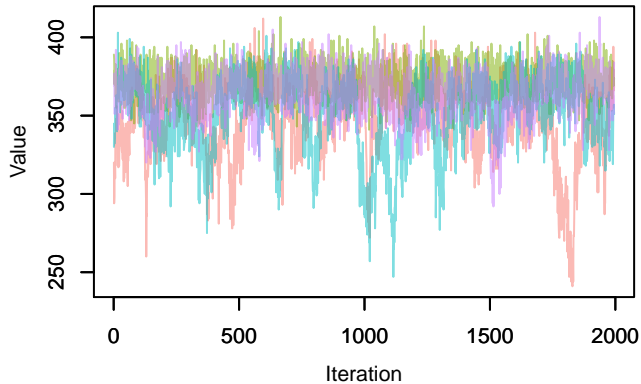**Density – y[72]**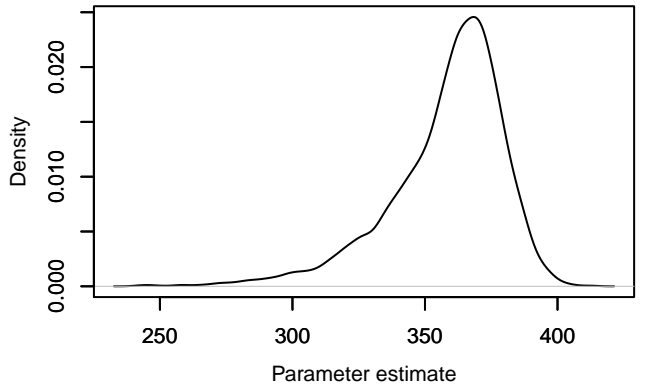

**Trace – y[73]**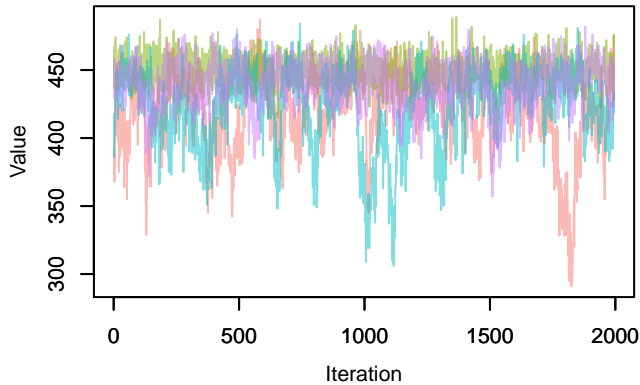**Density – y[73]**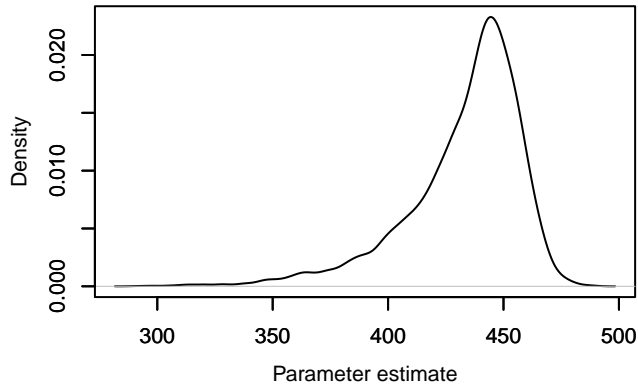**Trace – y[74]**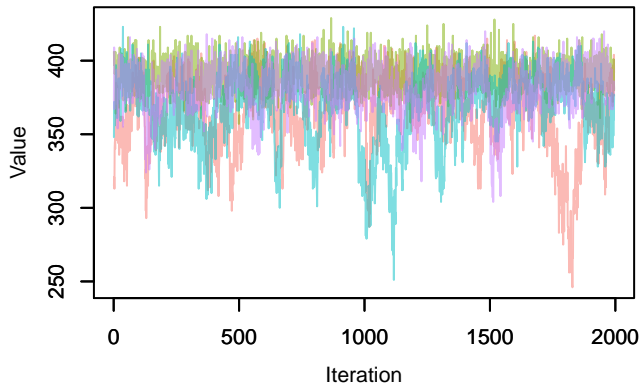**Density – y[74]**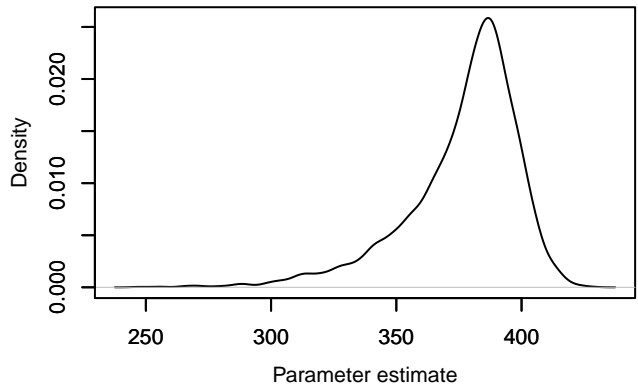**Trace – y[75]**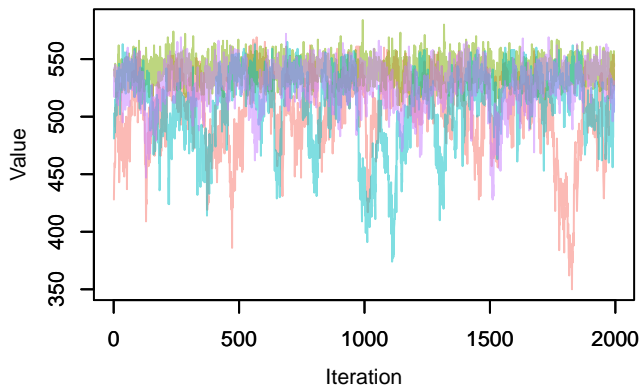**Density – y[75]**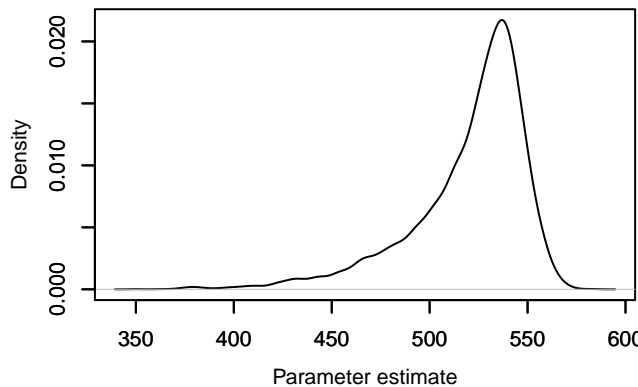

**Trace – y[76]**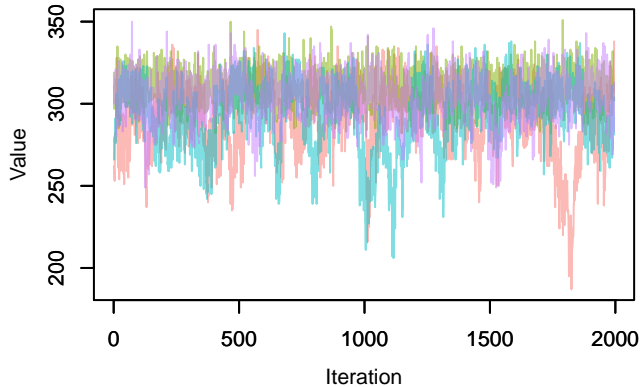**Density – y[76]**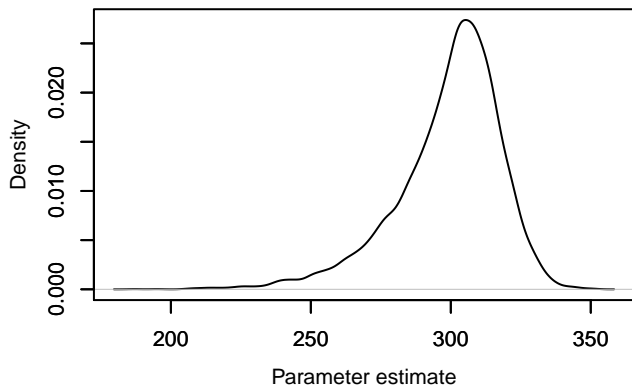**Trace – y[77]**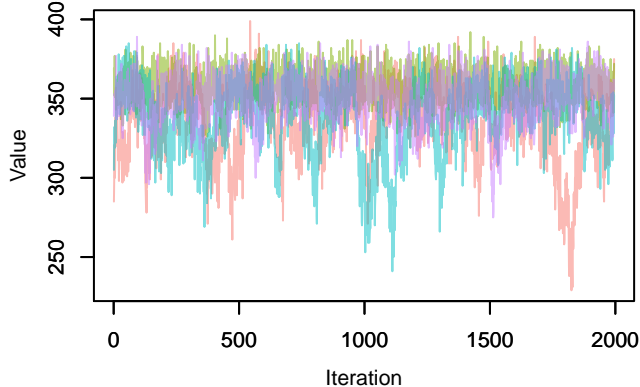**Density – y[77]**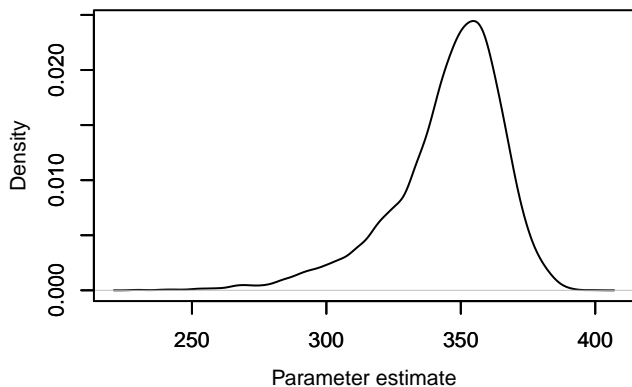**Trace – y[78]**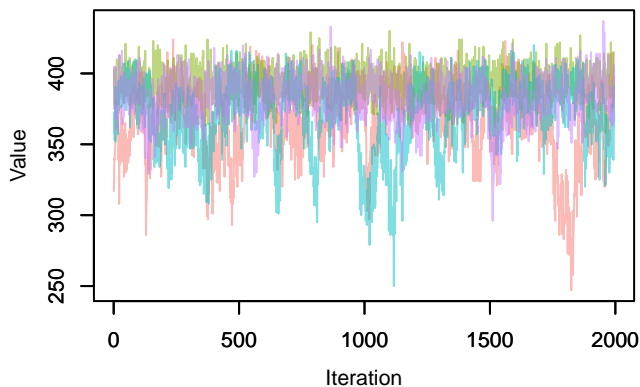**Density – y[78]**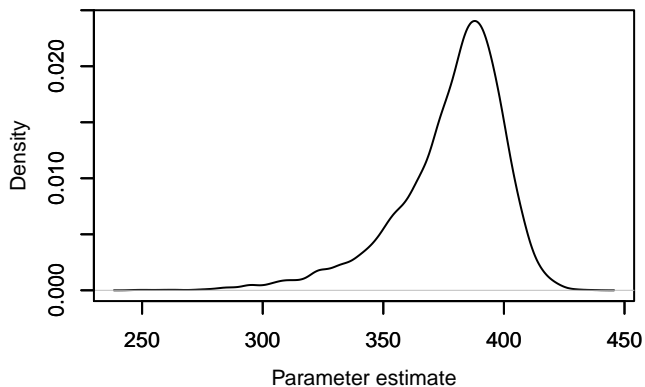

**Trace – y[79]**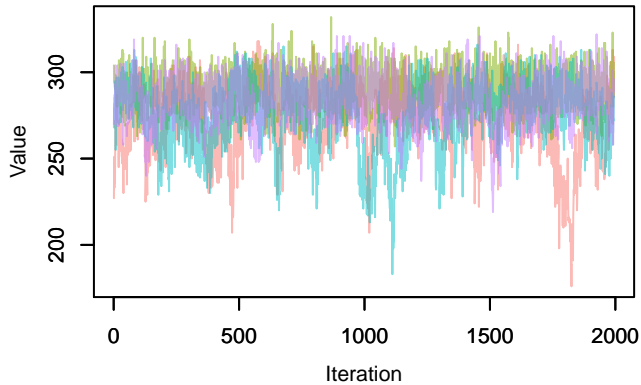**Density – y[79]**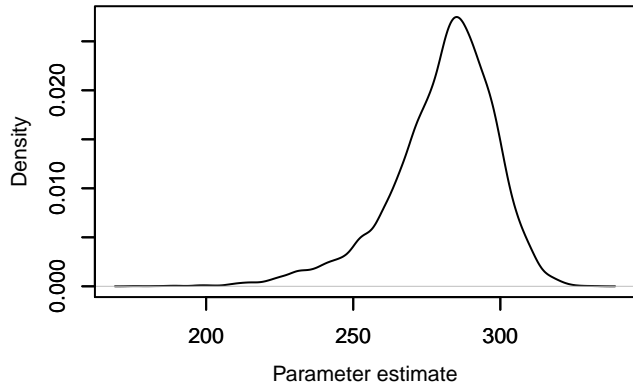**Trace – y[80]**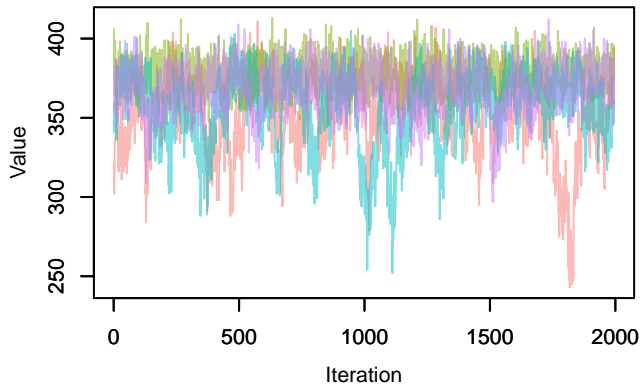**Density – y[80]**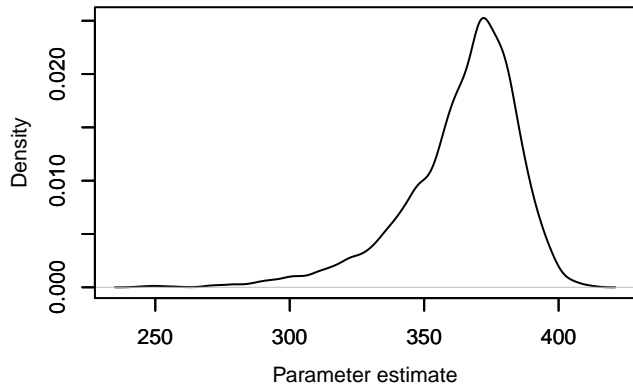**Trace – y[81]**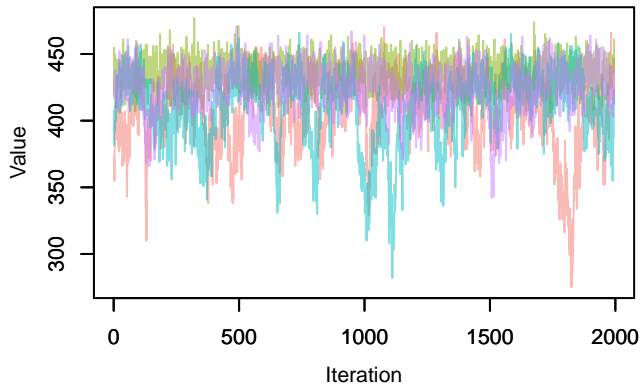**Density – y[81]**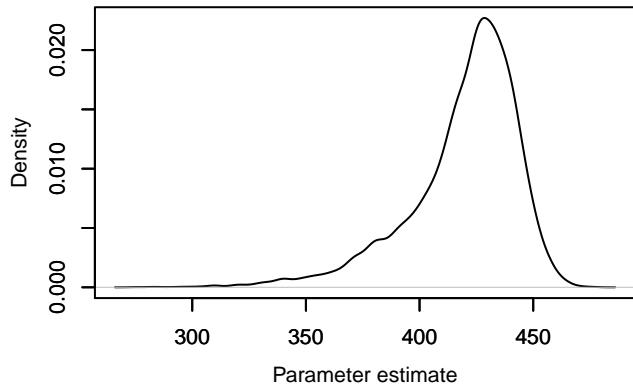

**Trace – y[82]**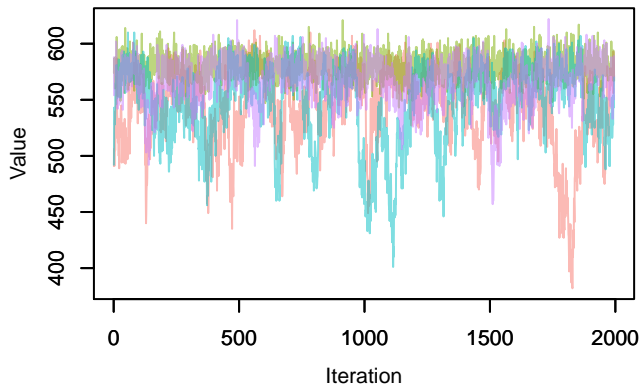**Density – y[82]**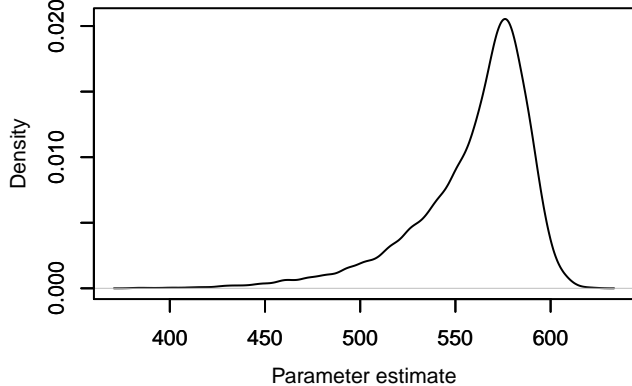**Trace – y[83]**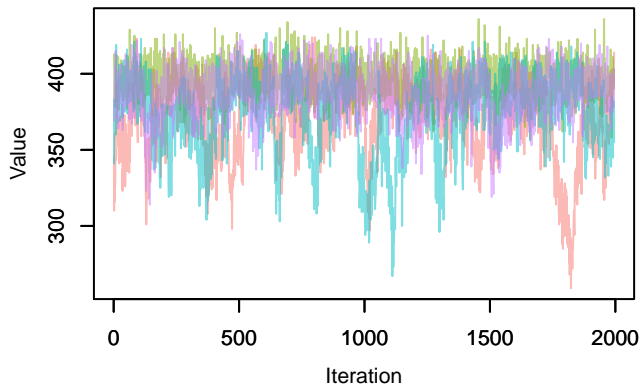**Density – y[83]**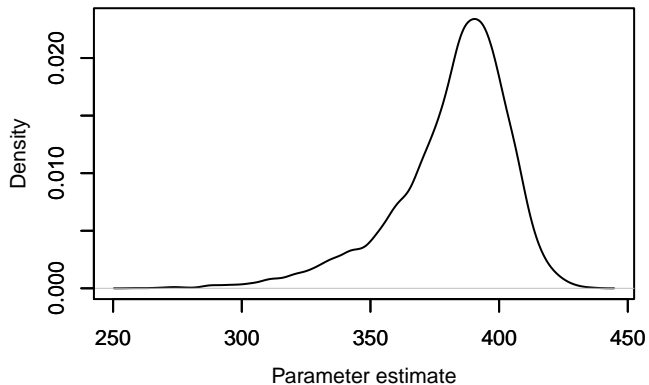**Trace – y[84]**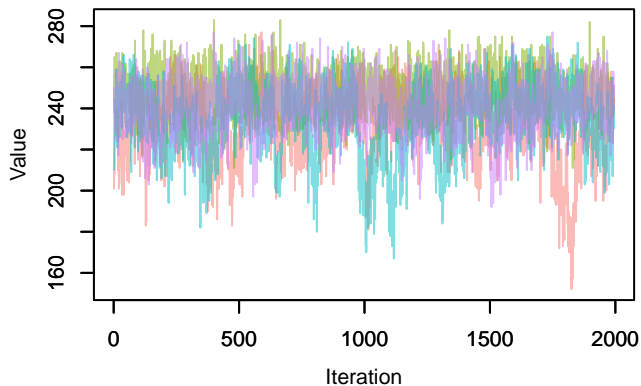**Density – y[84]**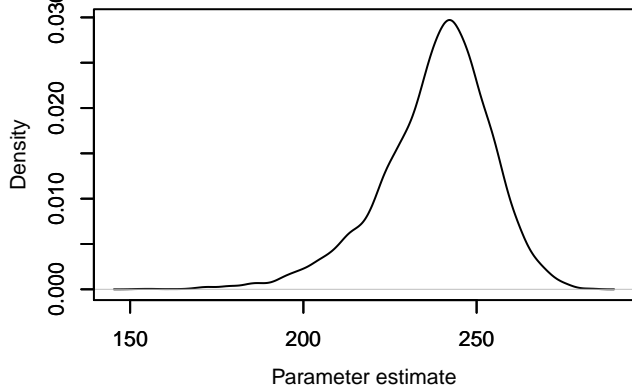

**Trace – y[85]**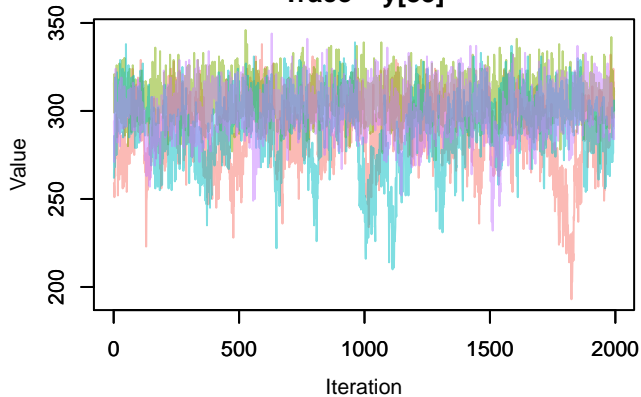**Density – y[85]**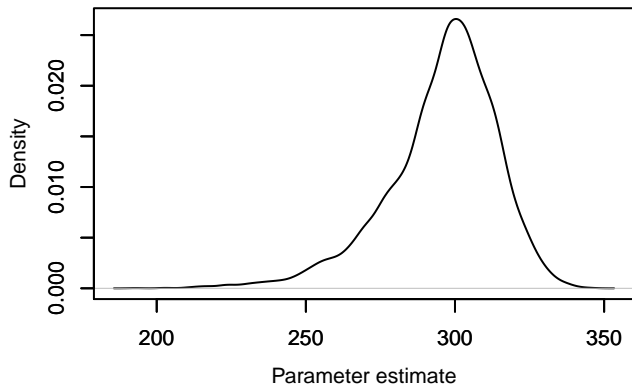**Trace – y[86]**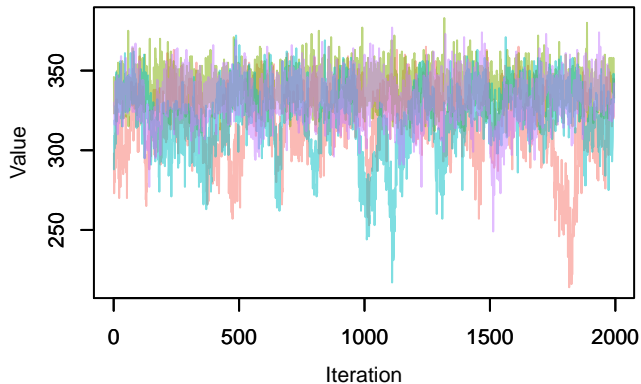**Density – y[86]**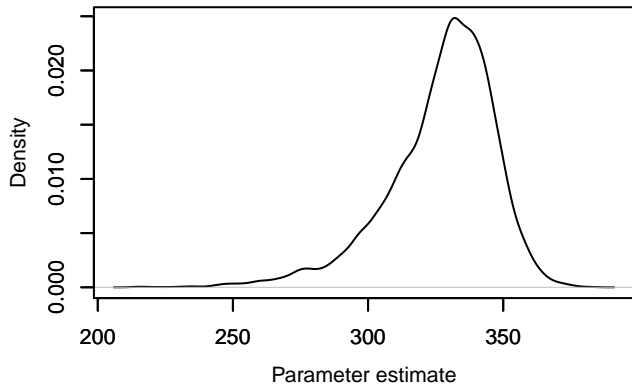**Trace – y[87]**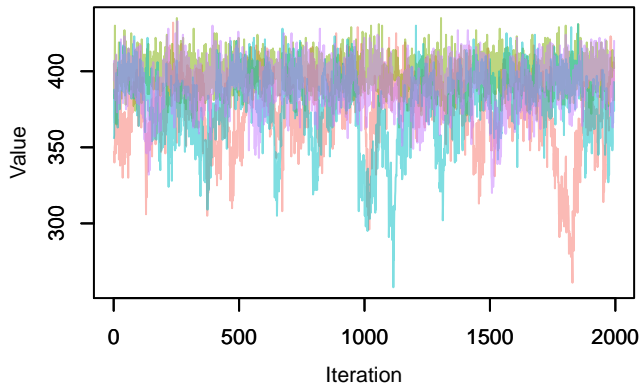**Density – y[87]**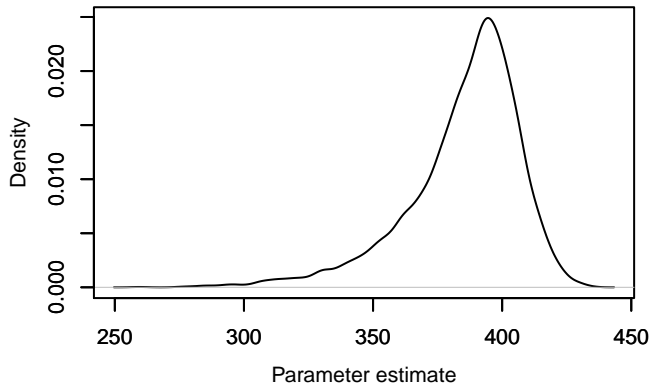

**Trace – y[88]**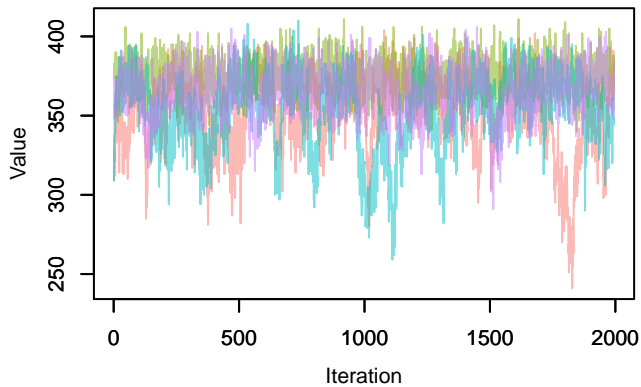**Density – y[88]**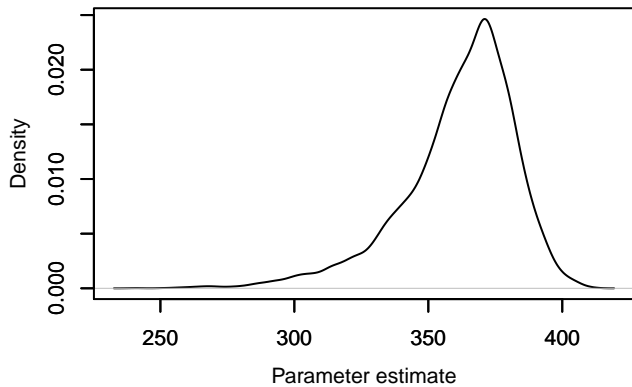**Trace – y[89]**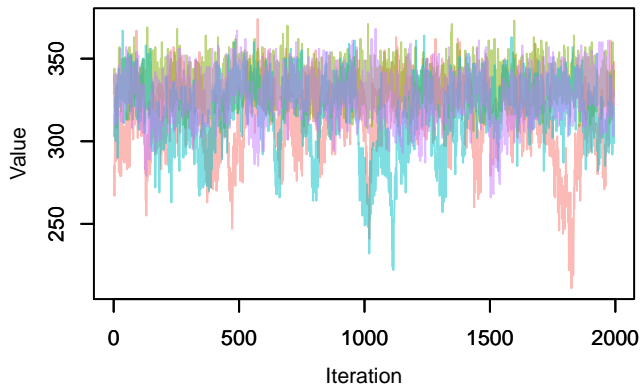**Density – y[89]**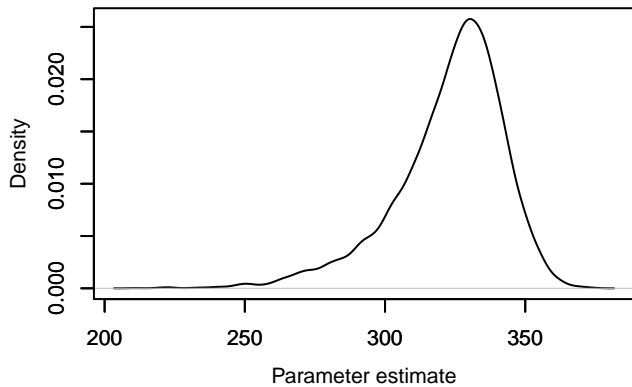**Trace – y[90]**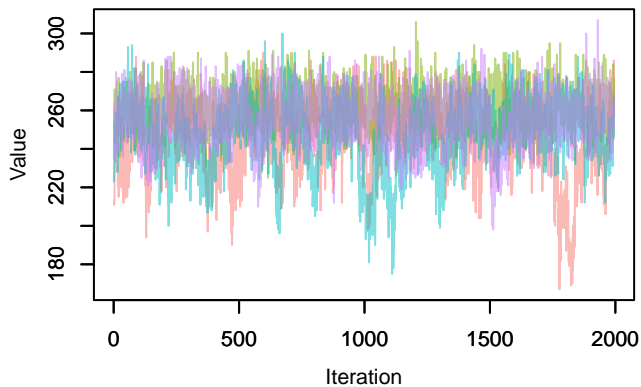**Density – y[90]**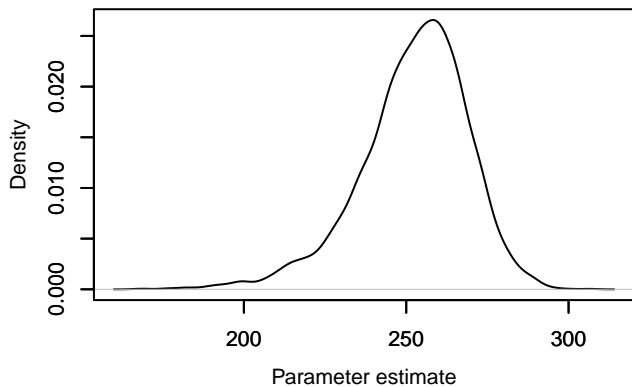



**Trace – y[91]**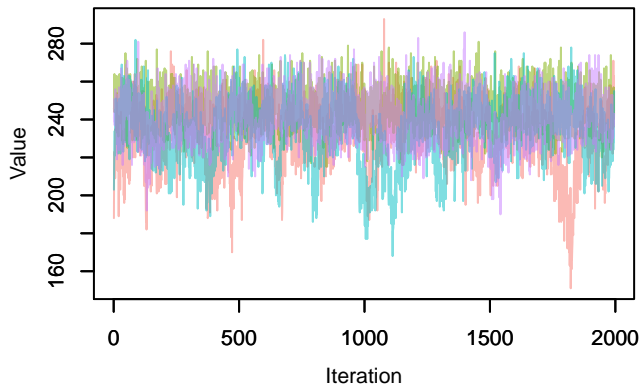**Density – y[91]**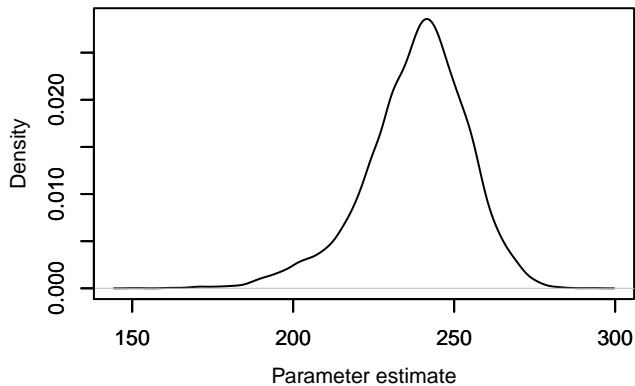**Trace – y[92]**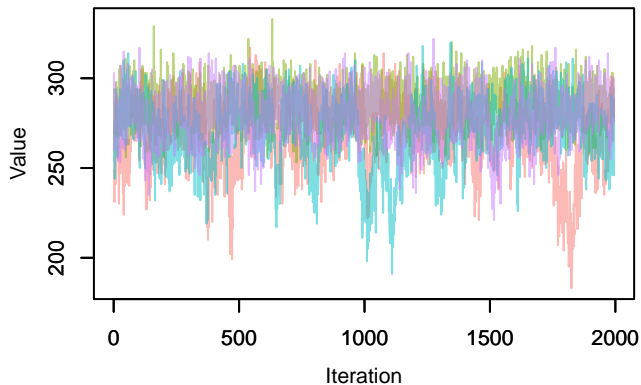**Density – y[92]**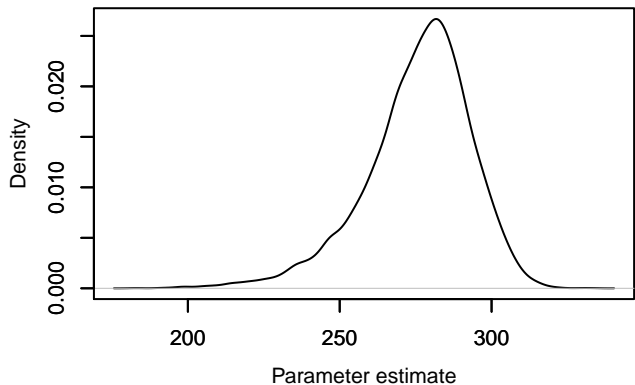**Trace – y[93]**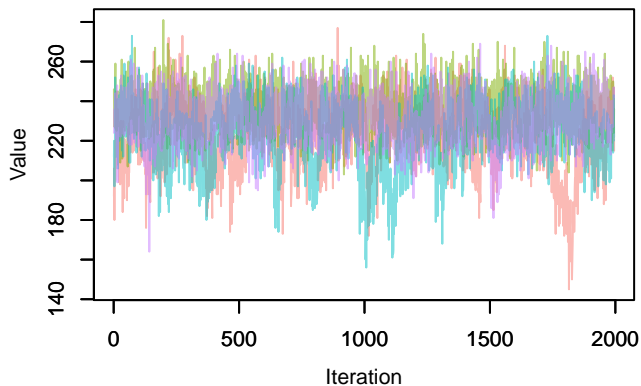**Density – y[93]**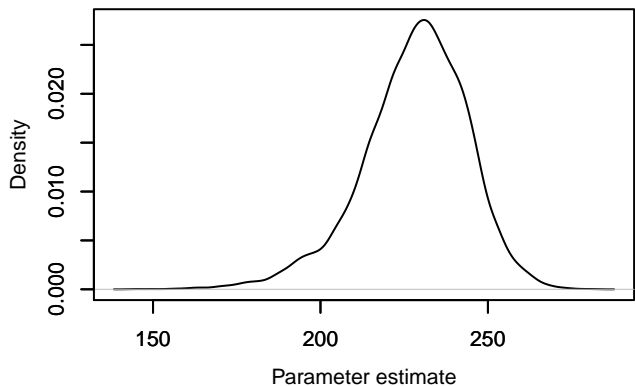

**Trace – y[94]**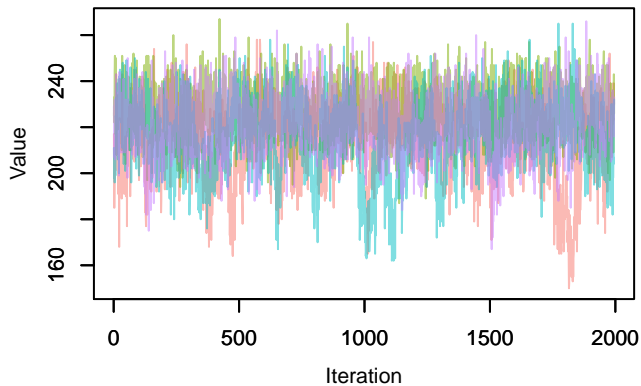**Density – y[94]**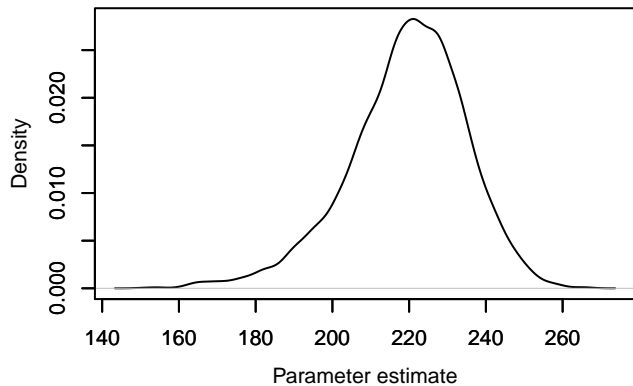**Trace – y[95]**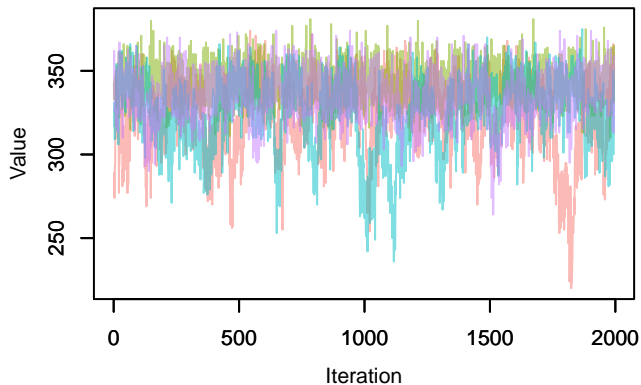**Density – y[95]**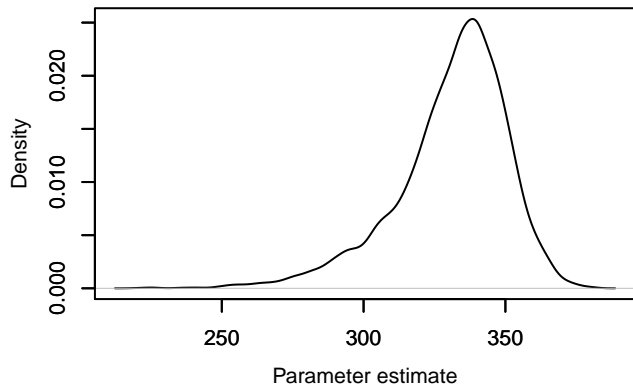**Trace – y[96]**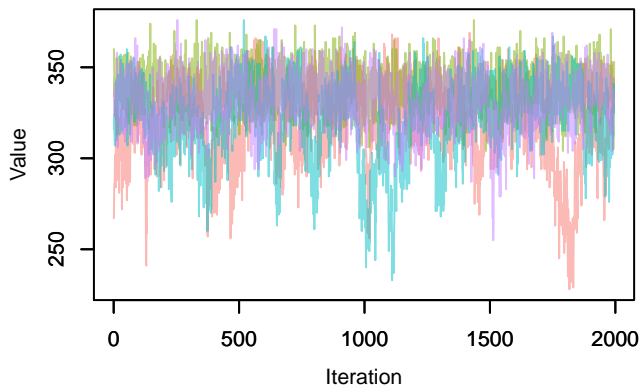**Density – y[96]**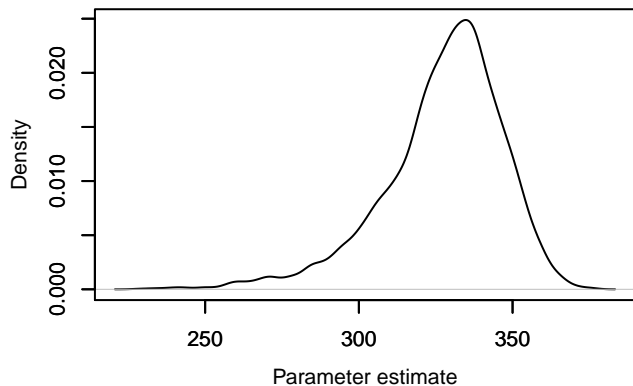

**Trace – y[97]**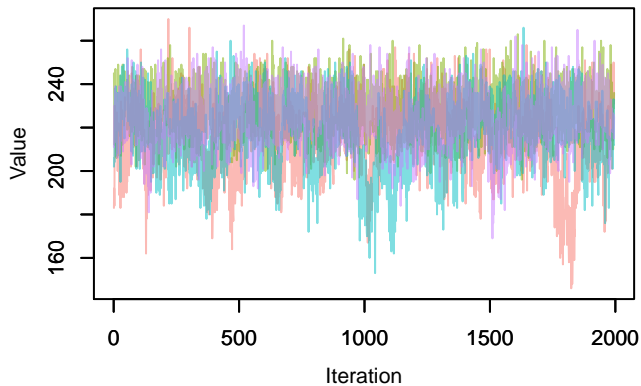**Density – y[97]**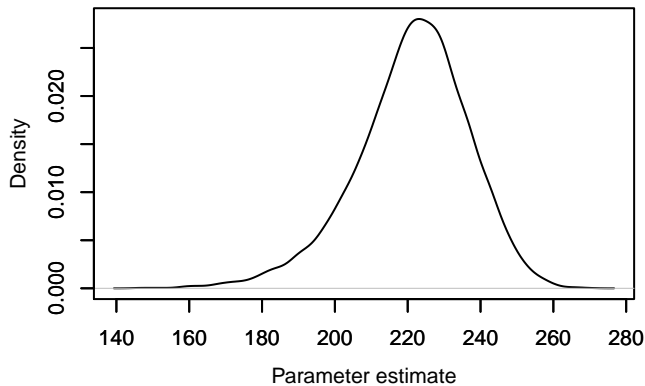**Trace – y[98]**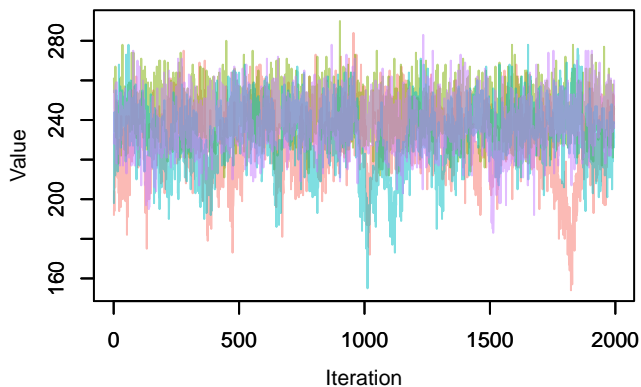**Density – y[98]**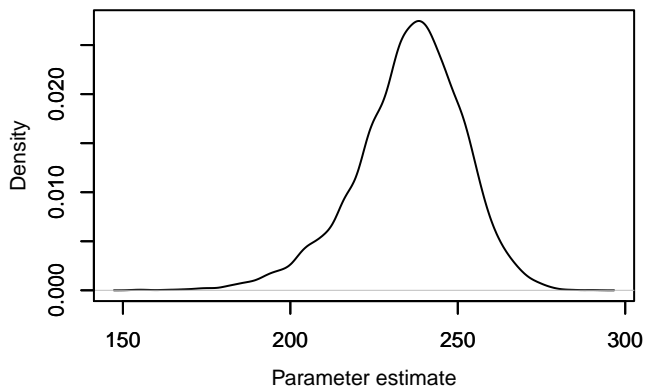**Trace – y[99]**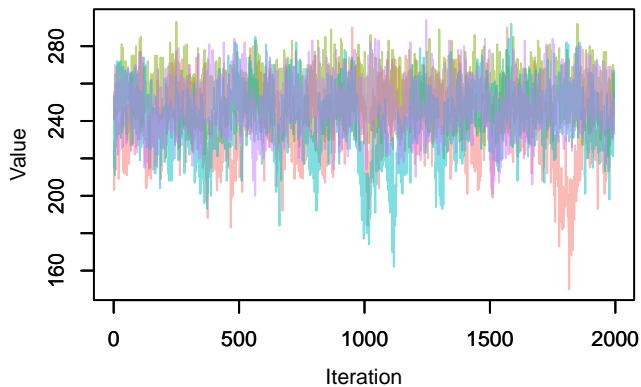**Density – y[99]**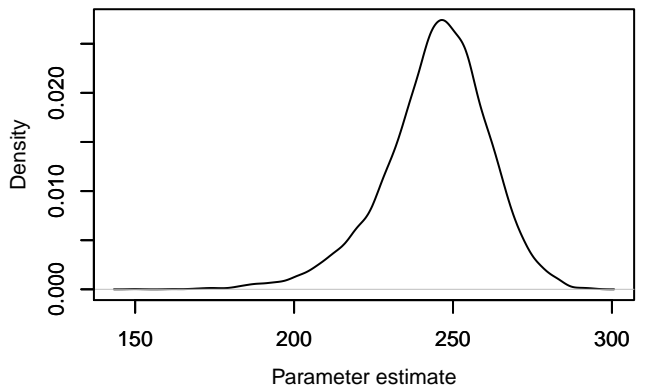

**Trace – y[100]**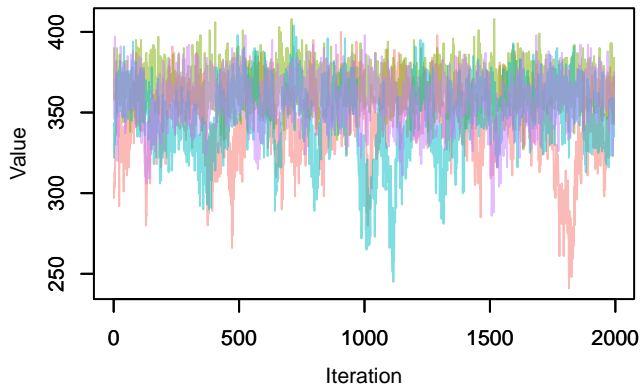**Density – y[100]**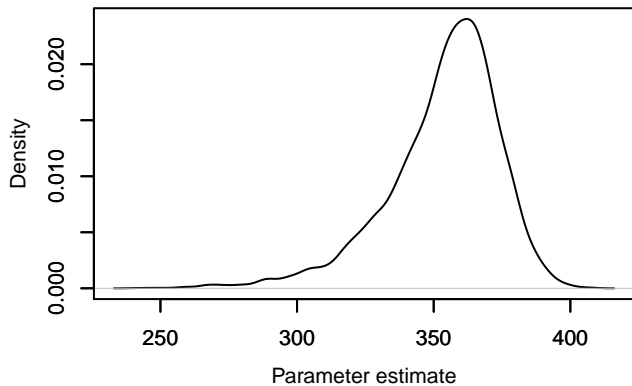**Trace – y[101]**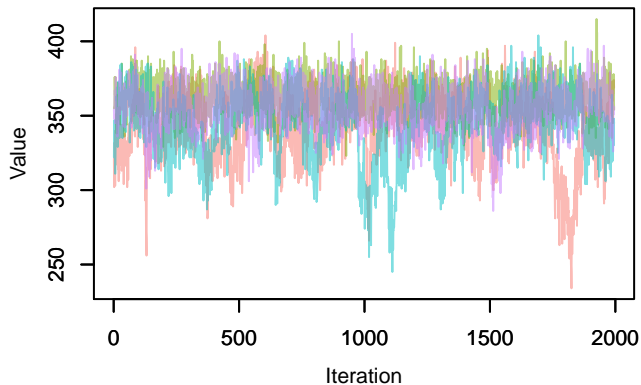**Density – y[101]**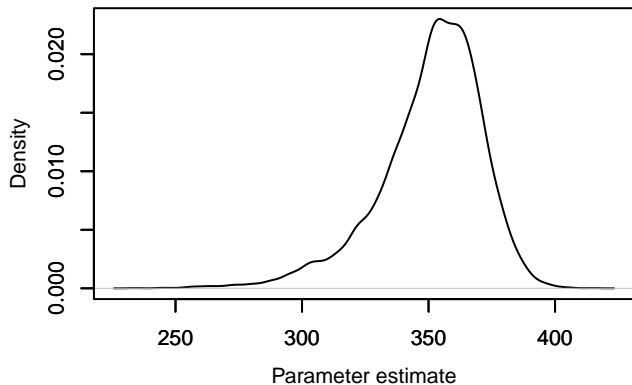**Trace – y[102]**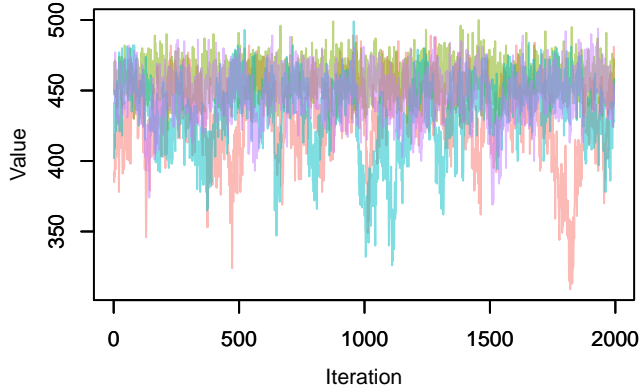**Density – y[102]**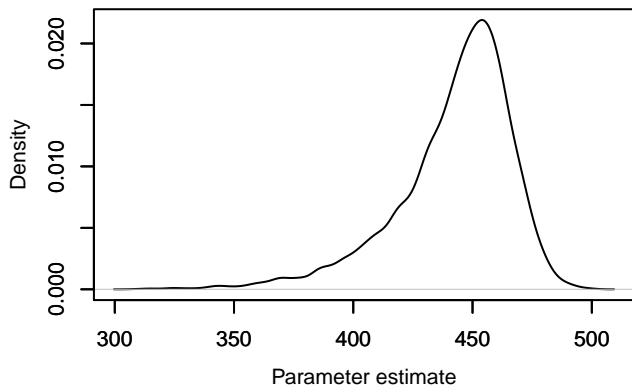

**Trace – y[103]**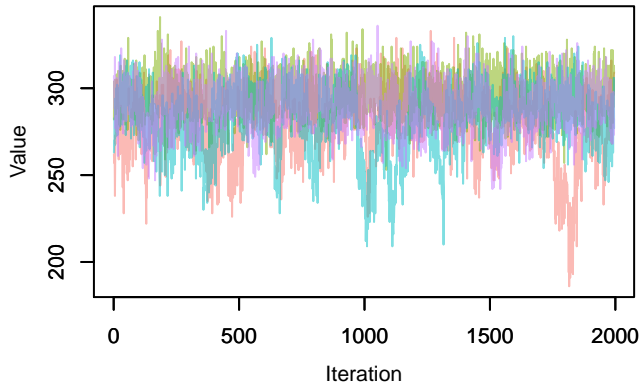**Density – y[103]**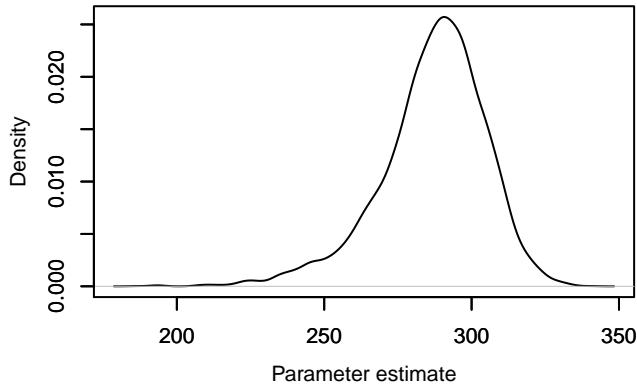**Trace – y[104]**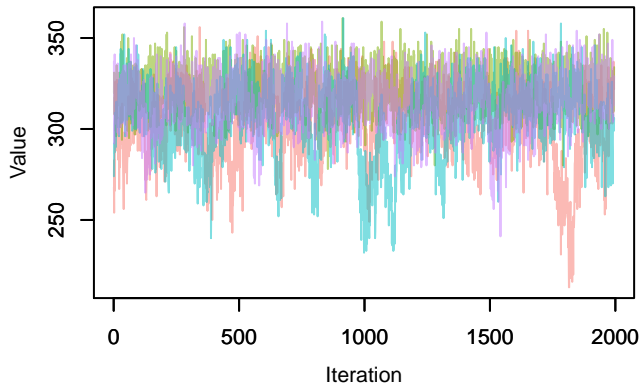**Density – y[104]**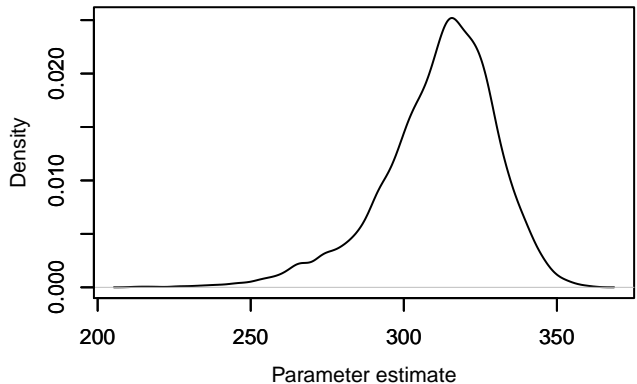**Trace – y[105]**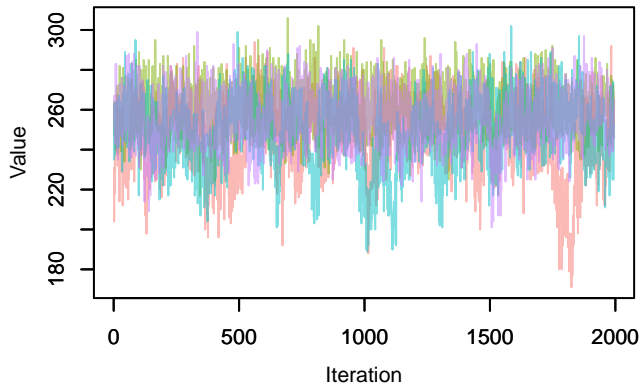**Density – y[105]**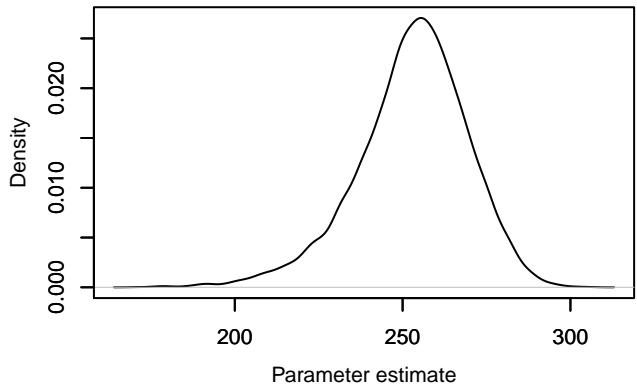

**Trace – y[106]**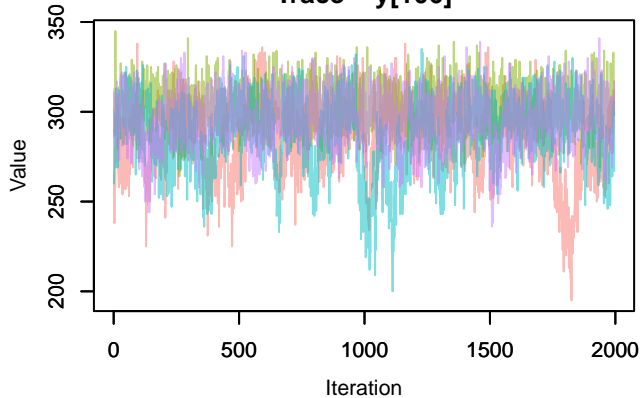**Density – y[106]**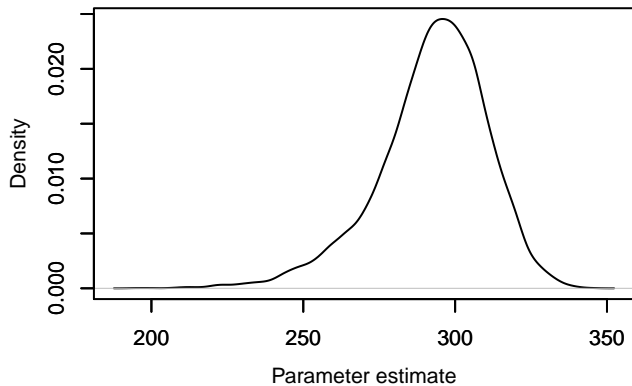**Trace – y[107]**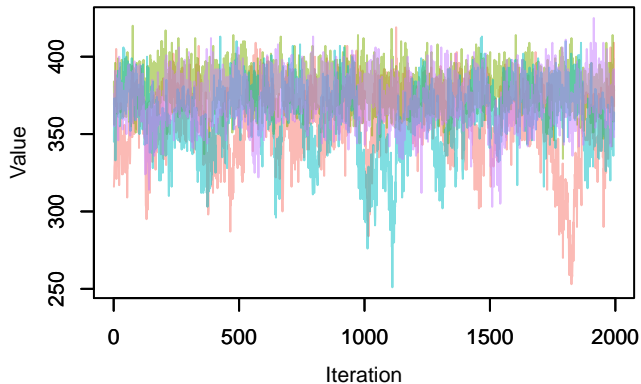**Density – y[107]**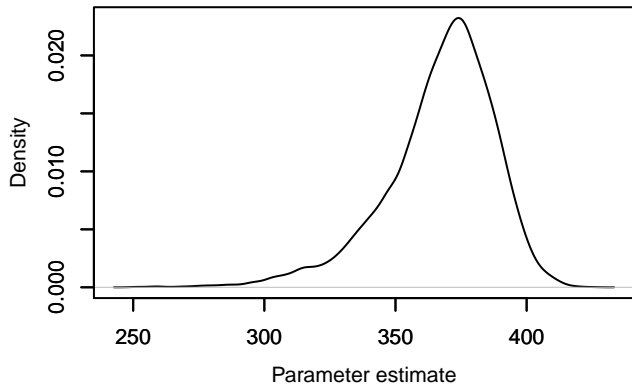**Trace – y[108]**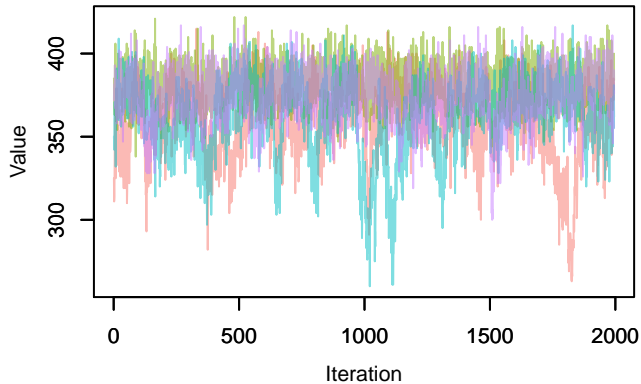**Density – y[108]**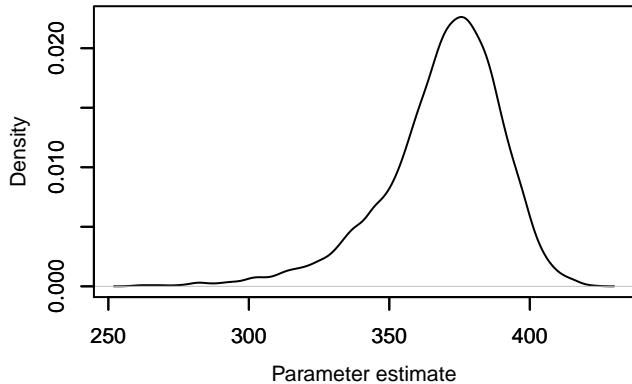

**Trace – y[109]**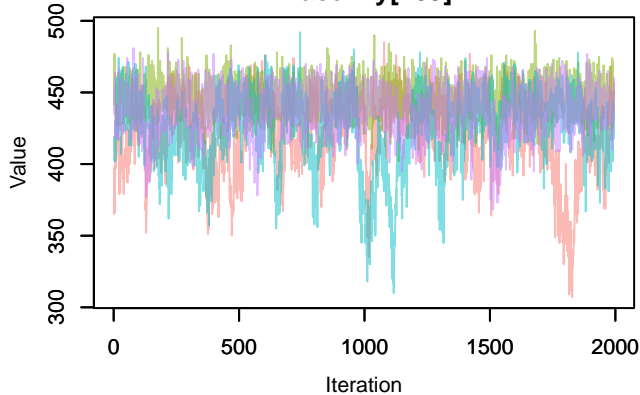**Density – y[109]**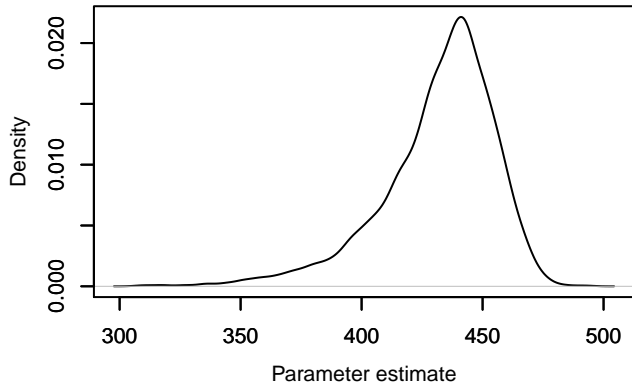**Trace – y[110]**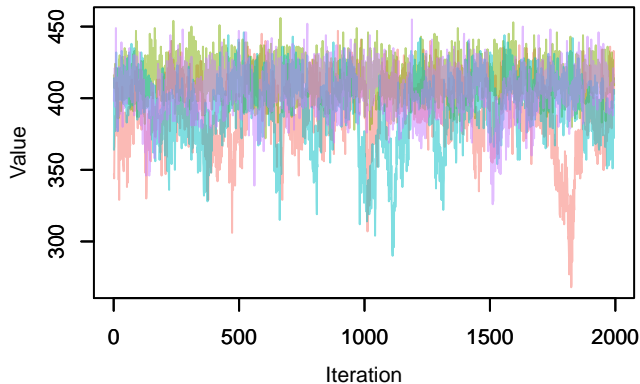**Density – y[110]**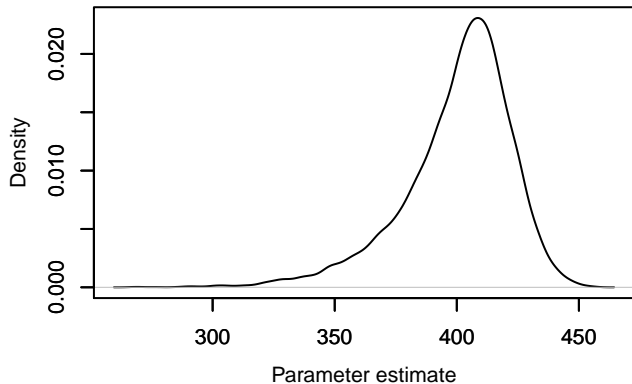**Trace – y[111]**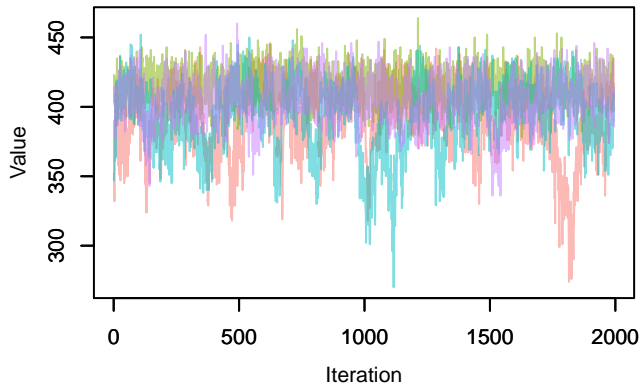**Density – y[111]**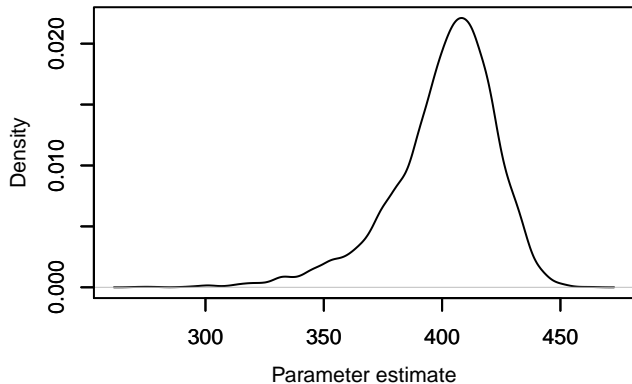

**Trace – y[112]**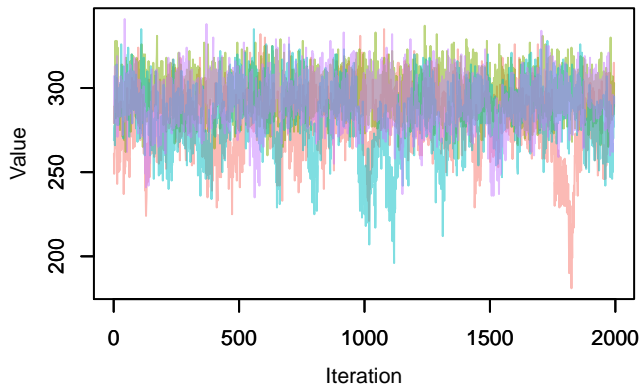**Density – y[112]**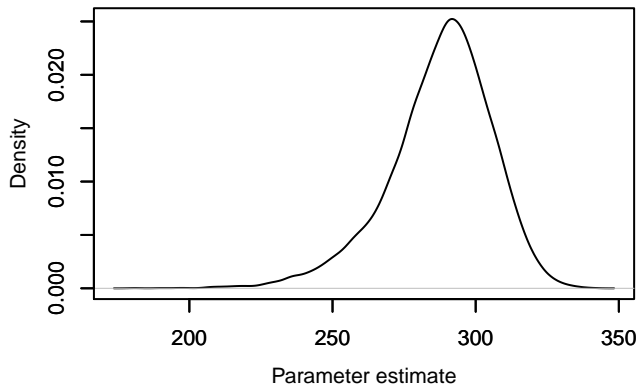**Trace – y[113]**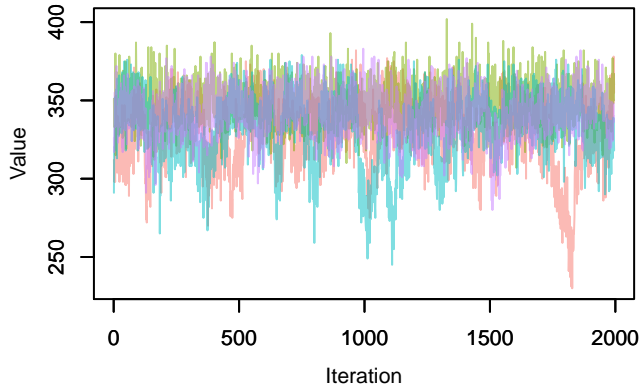**Density – y[113]**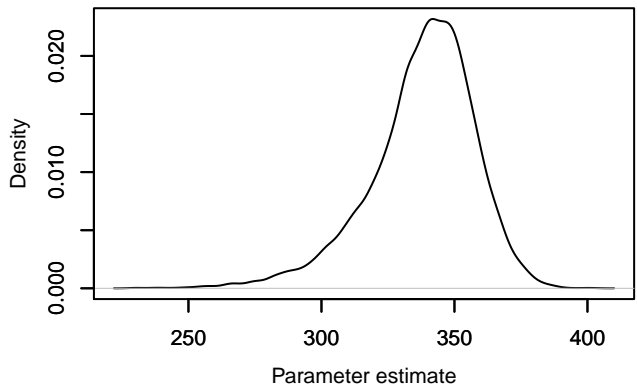**Trace – y[114]**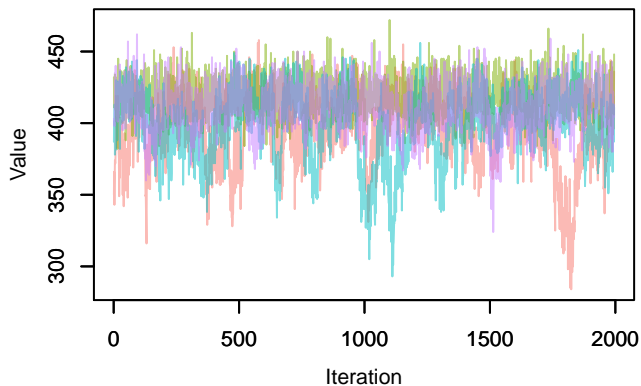**Density – y[114]**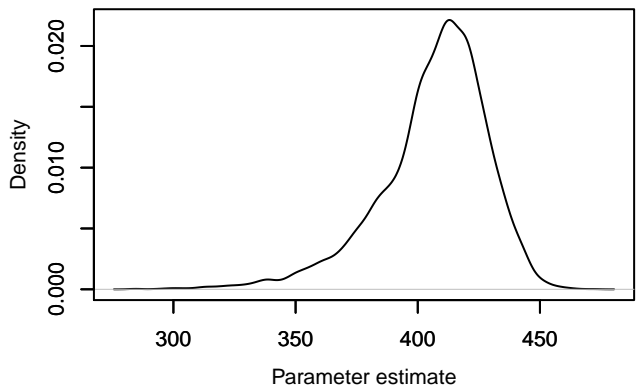



**Trace – y[115]**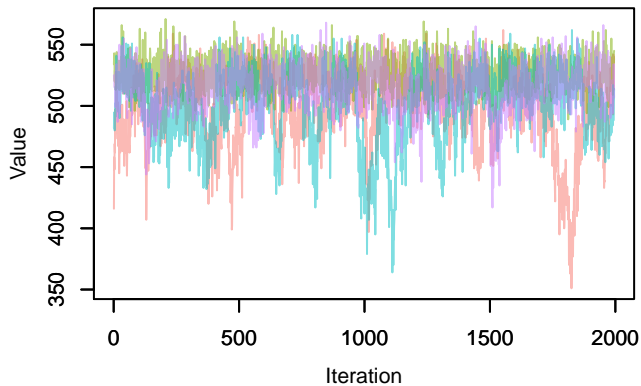**Density – y[115]**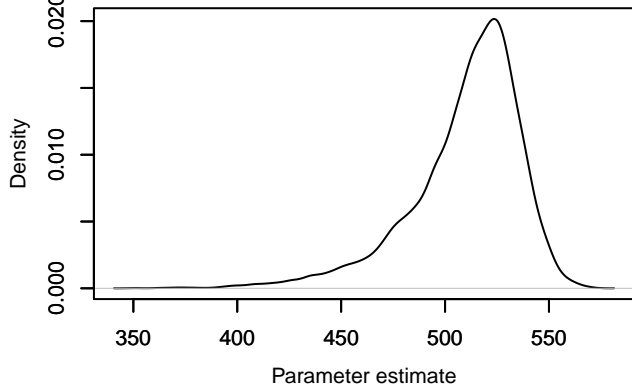**Trace – y[116]**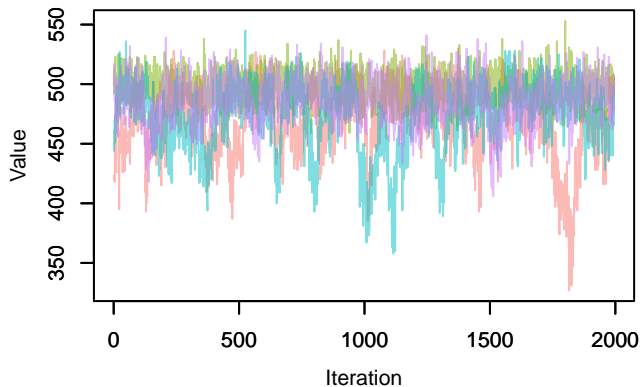**Density – y[116]**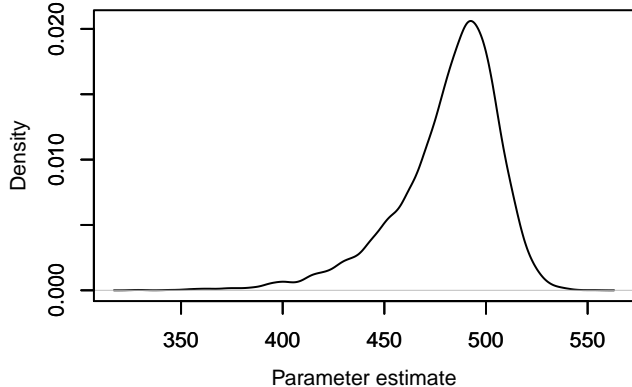**Trace – y[117]**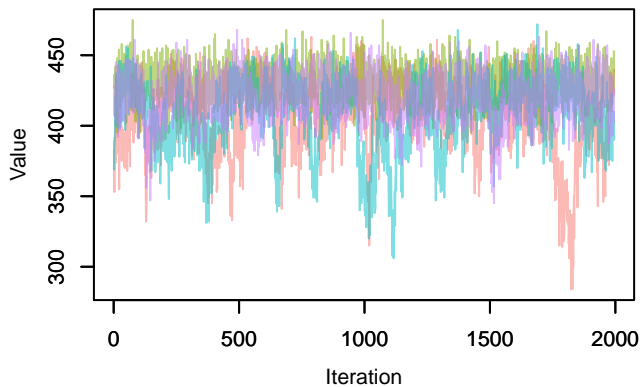**Density – y[117]**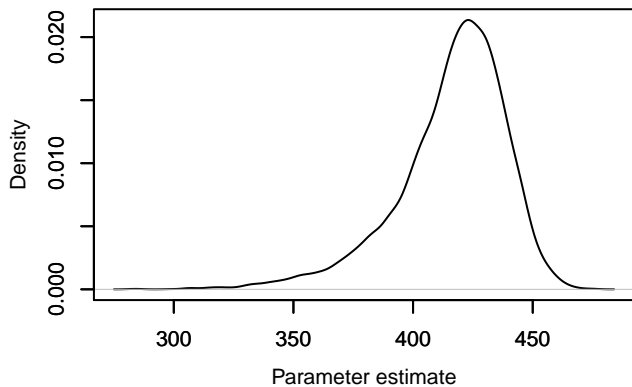

**Trace – y[118]**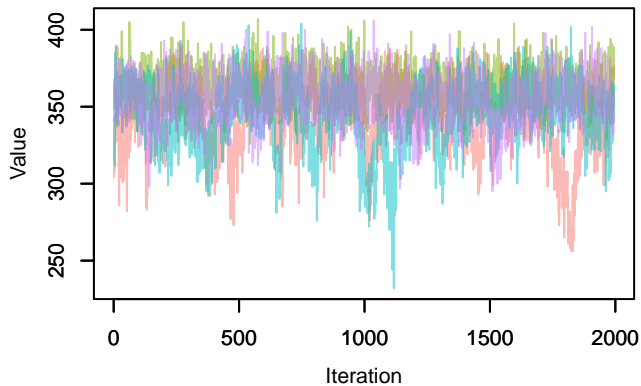**Density – y[118]**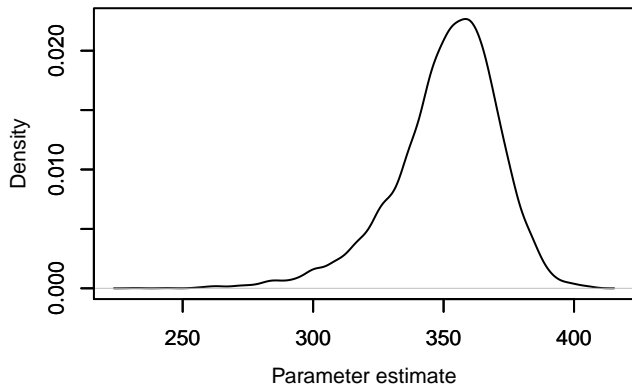**Trace – y[119]**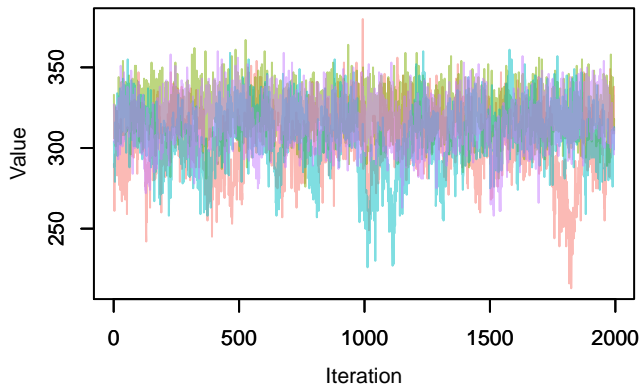**Density – y[119]**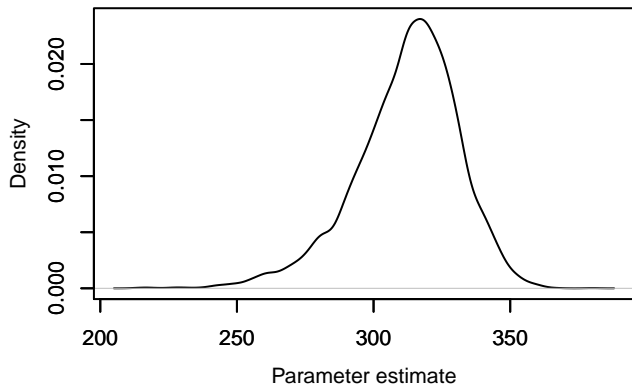**Trace – y[120]**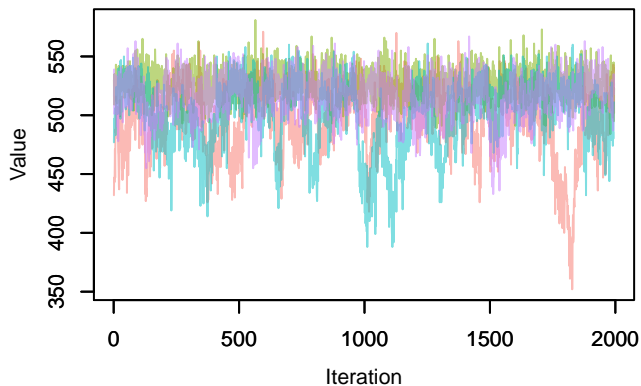**Density – y[120]**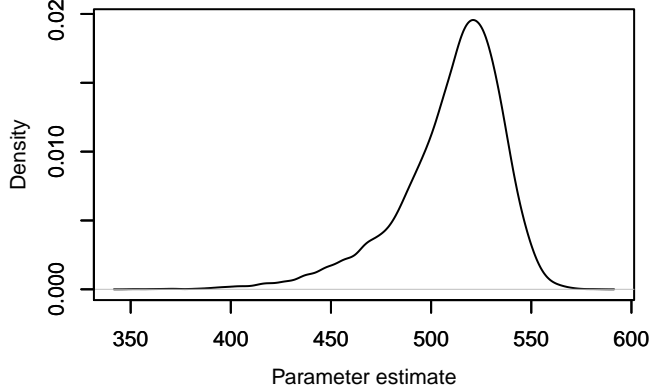

**Trace – y[121]**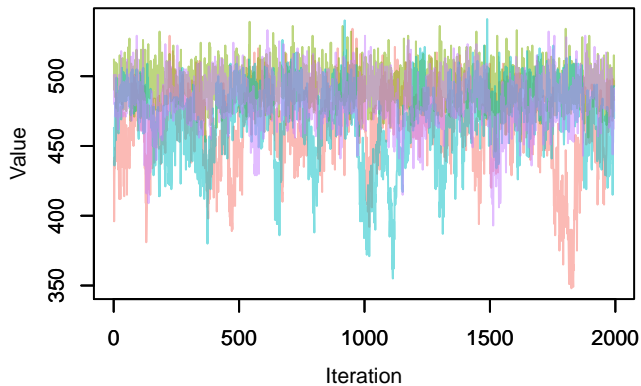**Density – y[121]**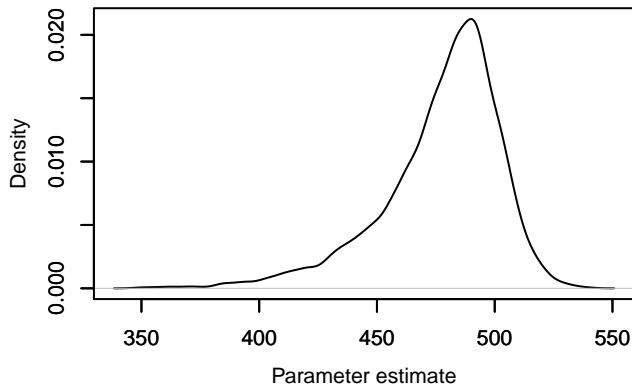**Trace – y[122]**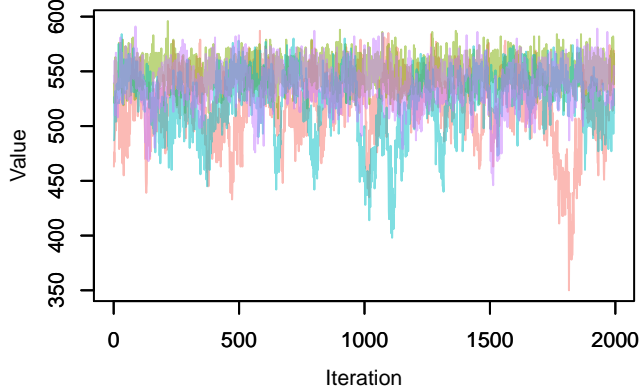**Density – y[122]**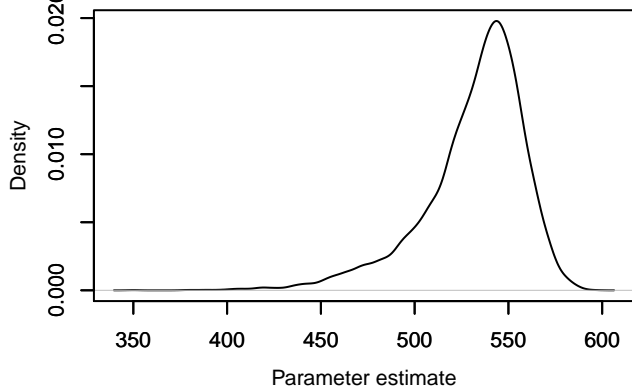**Trace – y[123]**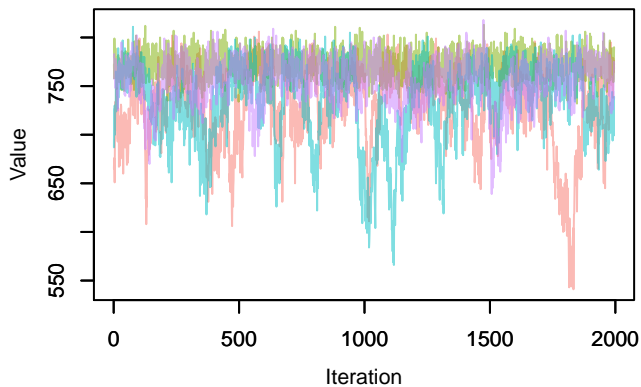**Density – y[123]**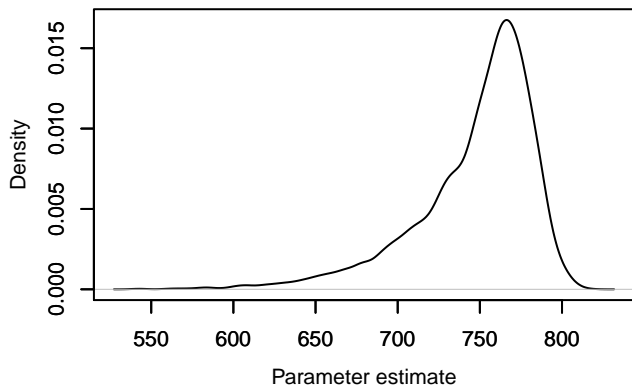

**Trace – y[124]**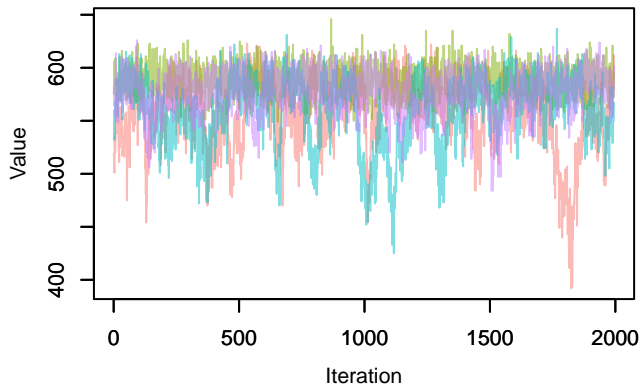**Density – y[124]**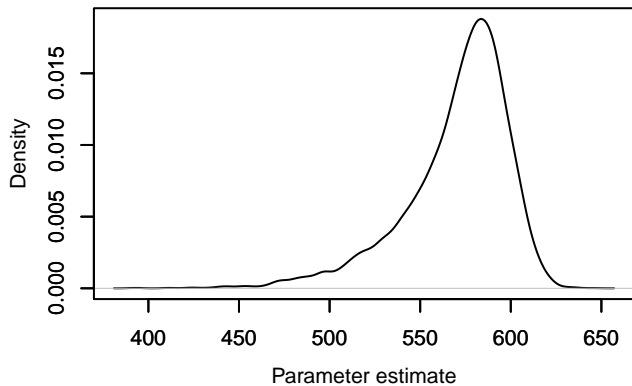**Trace – y[125]**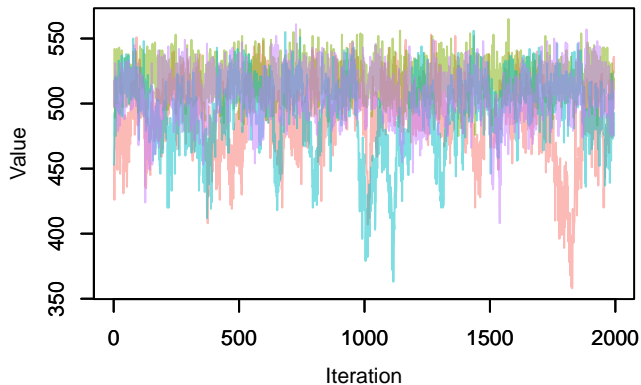**Density – y[125]**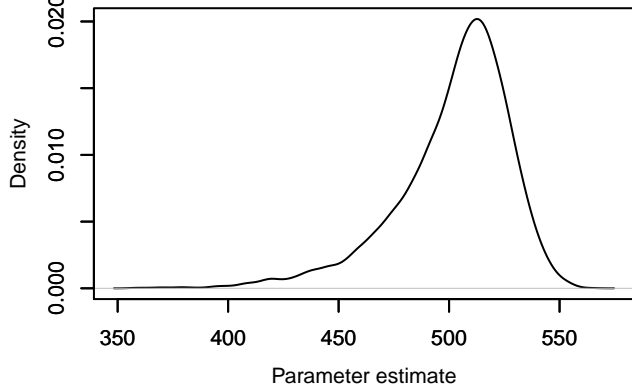**Trace – y[126]**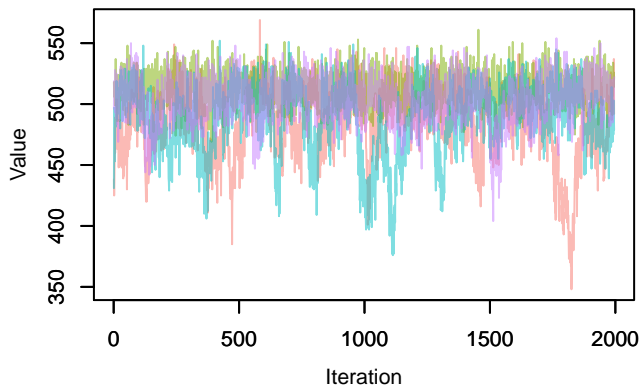**Density – y[126]**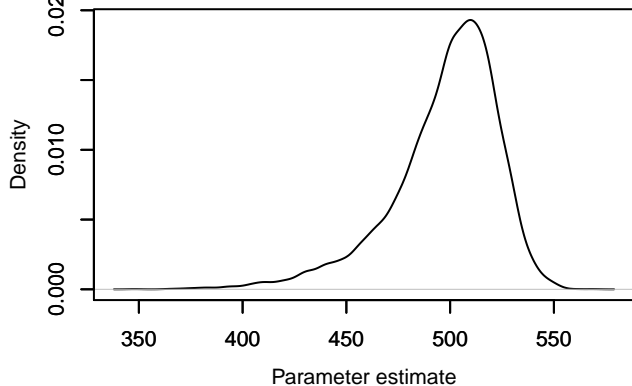

**Trace – y[127]**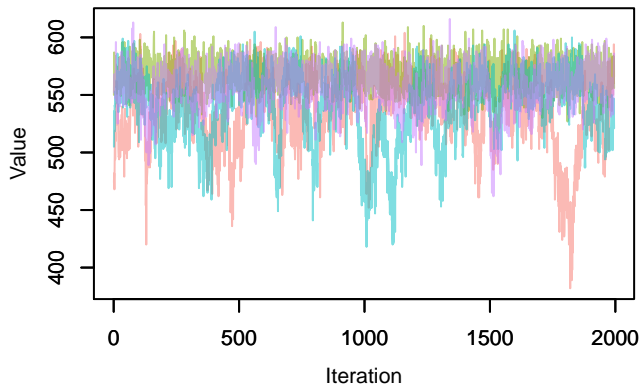**Density – y[127]**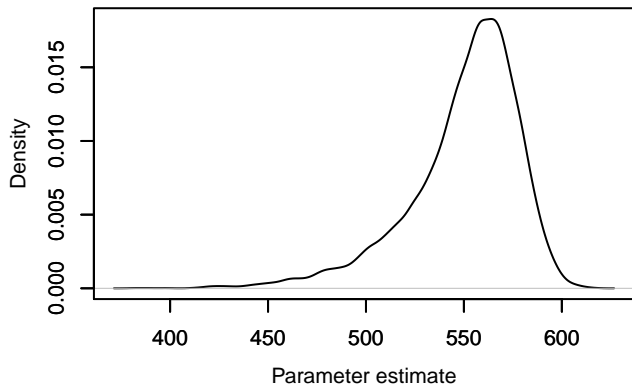**Trace – y[128]**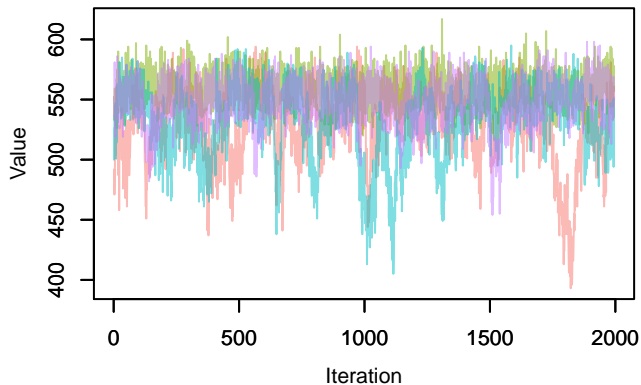**Density – y[128]**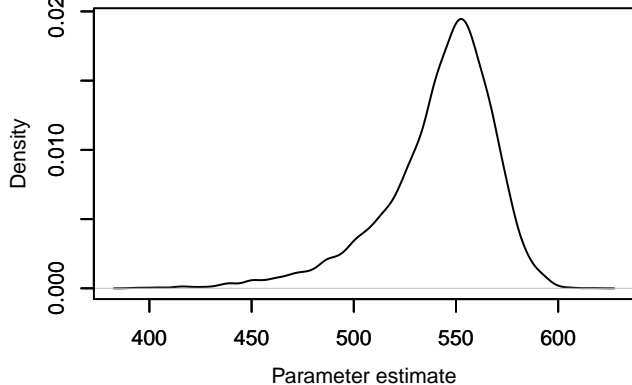**Trace – y[129]**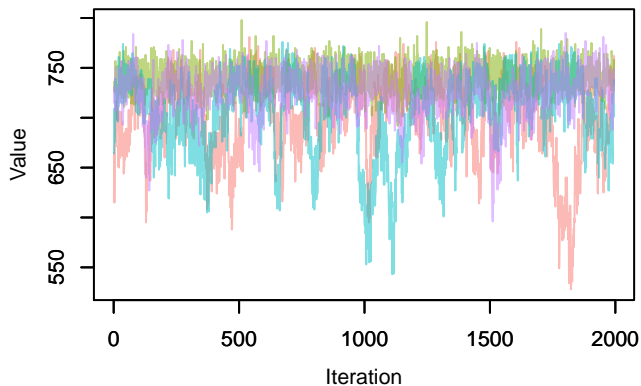**Density – y[129]**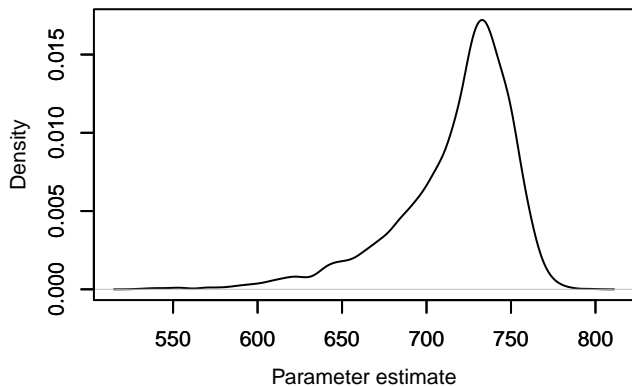

**Trace – y[130]**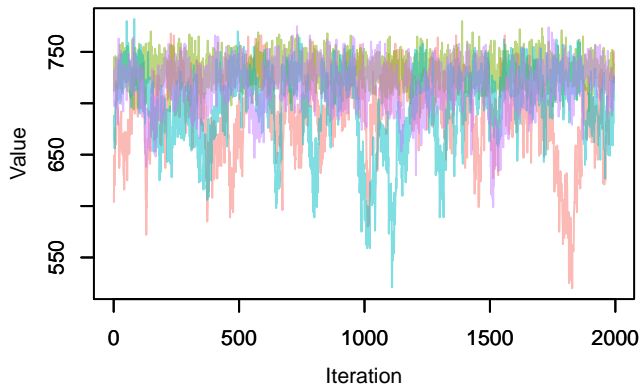**Density – y[130]**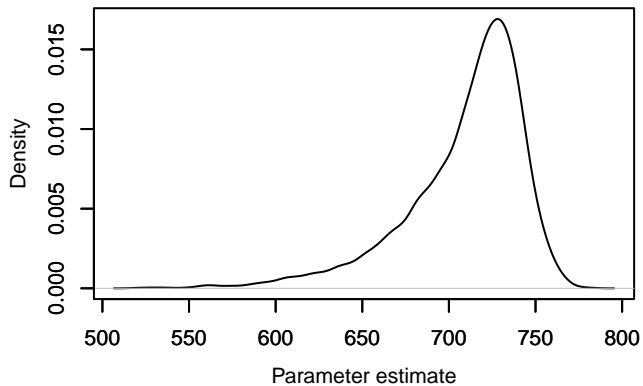**Trace – y[131]**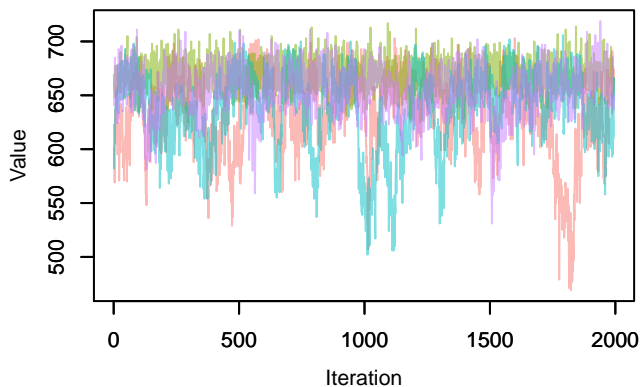**Density – y[131]**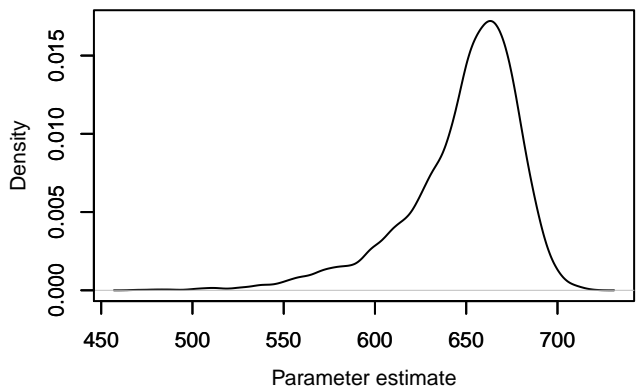**Trace – y[132]**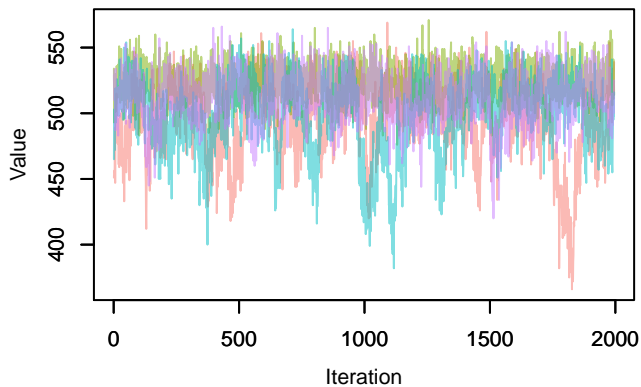**Density – y[132]**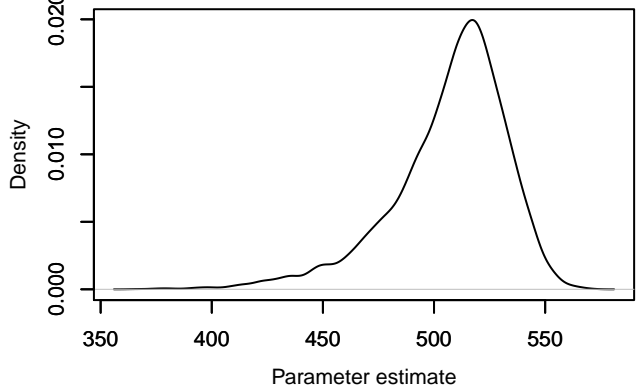

**Trace – y[133]**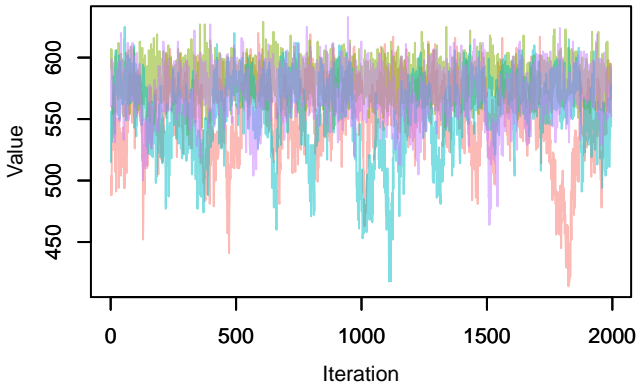**Density – y[133]**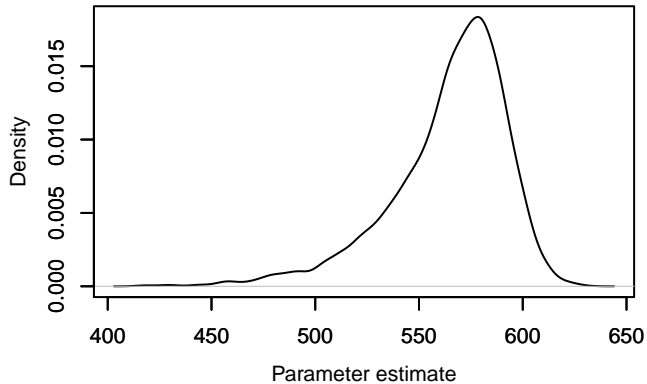**Trace – y[134]**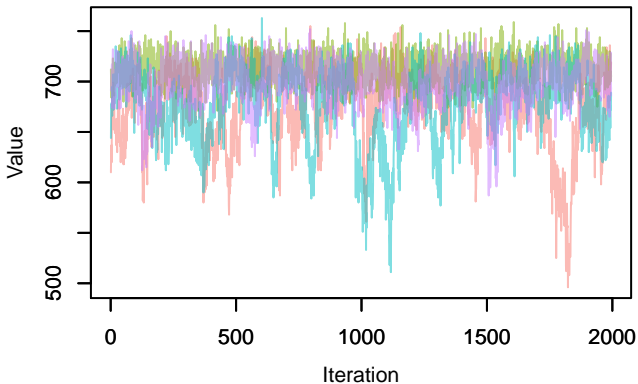**Density – y[134]**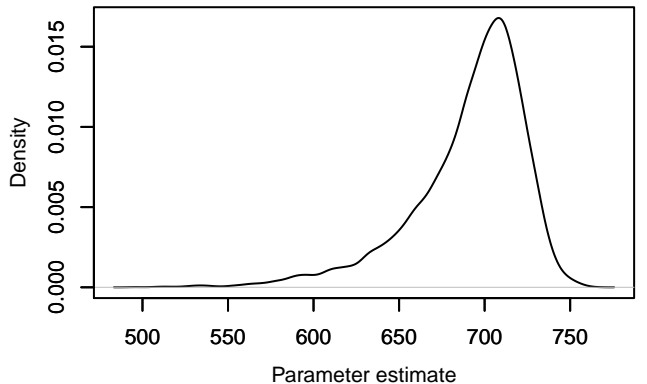**Trace – y[135]**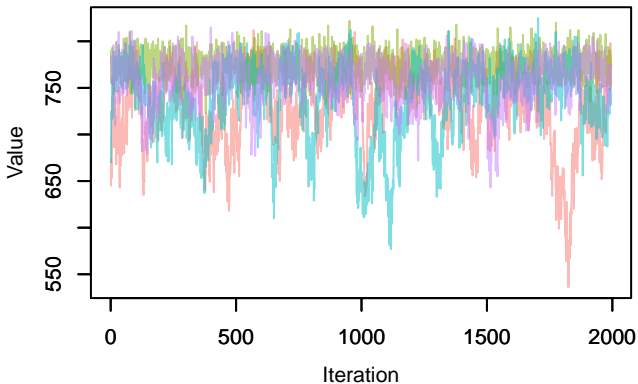**Density – y[135]**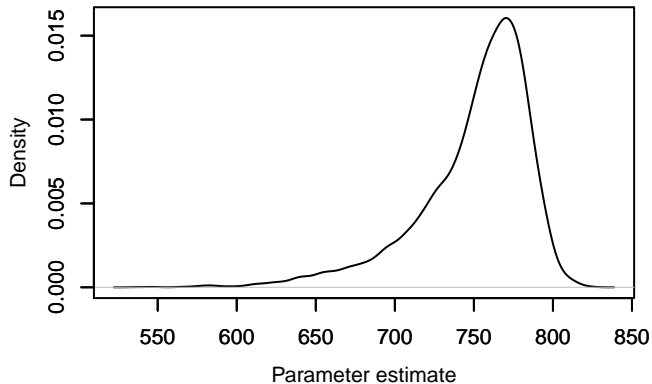

**Trace – y[136]**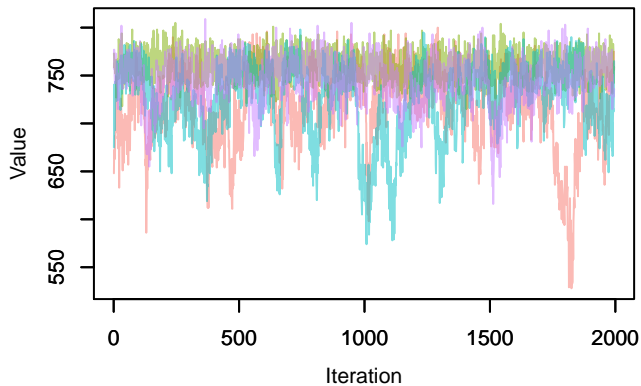**Density – y[136]**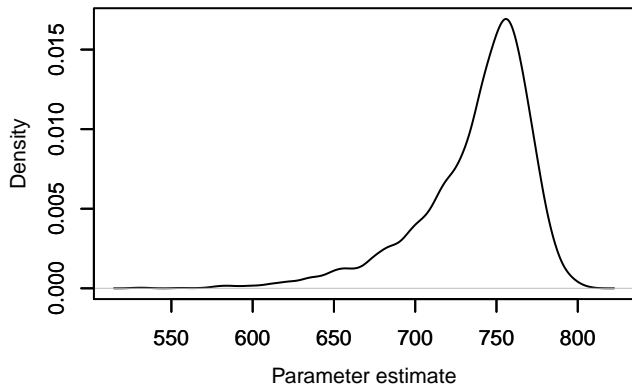**Trace – y[137]**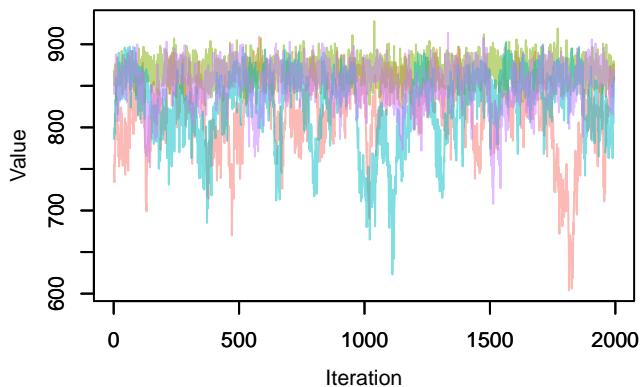**Density – y[137]**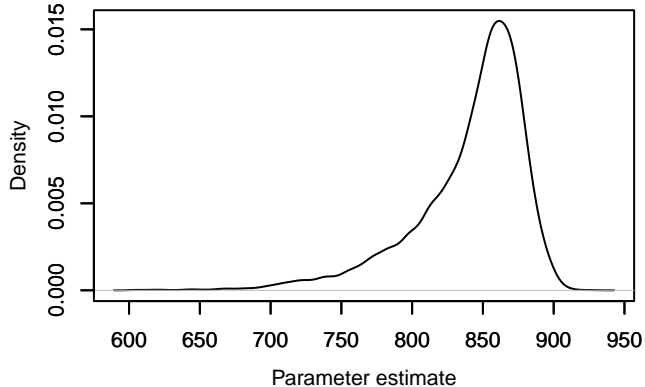**Trace – y[138]**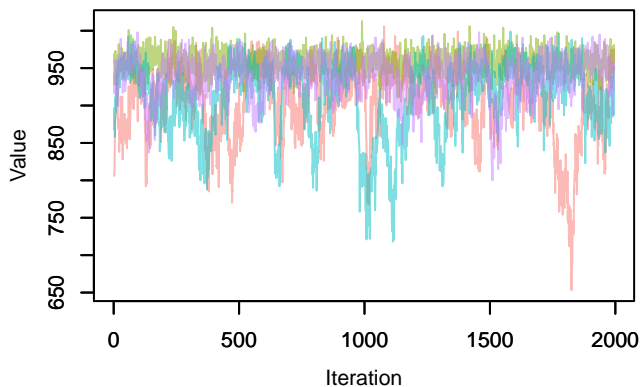**Density – y[138]**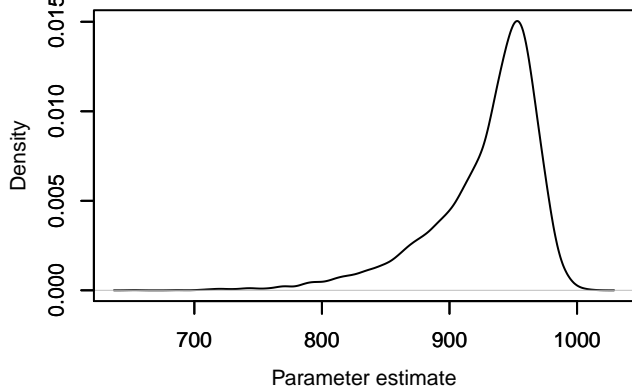



**Trace – y[139]**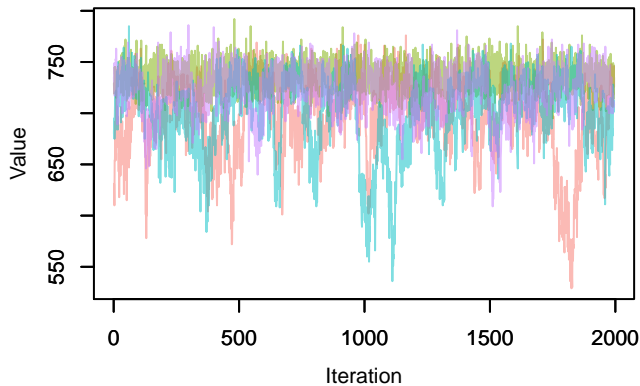**Density – y[139]**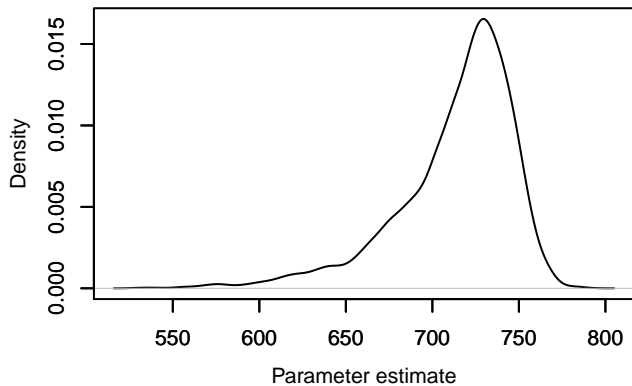**Trace – y[140]**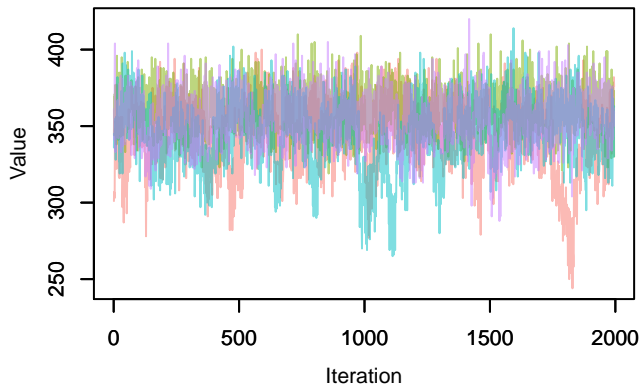**Density – y[140]**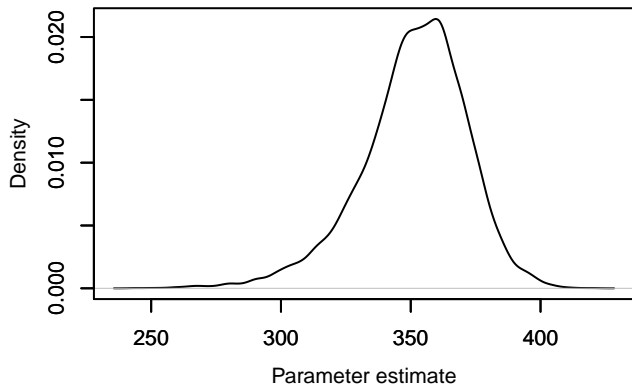**Trace – y[141]**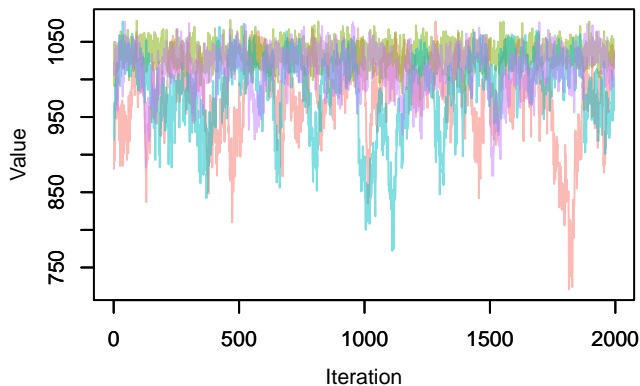**Density – y[141]**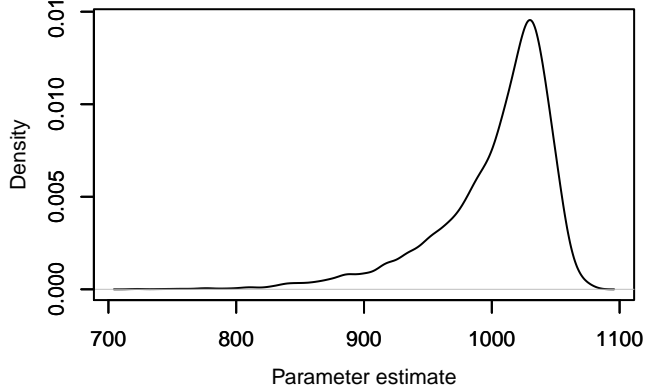

**Trace – y[142]**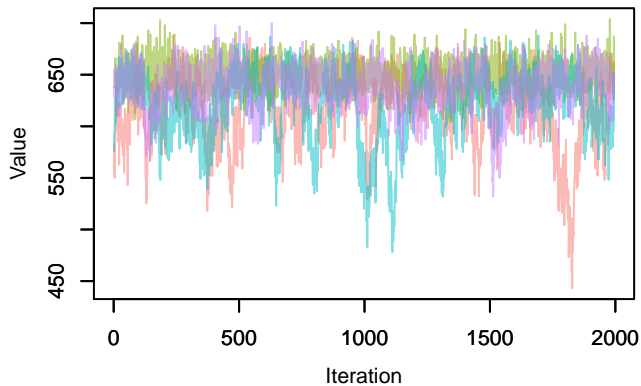**Density – y[142]**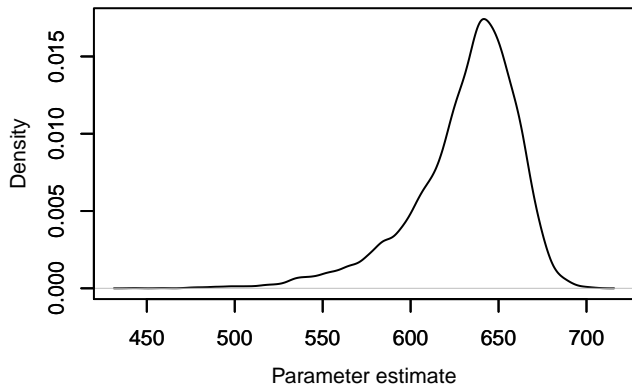**Trace – y[143]**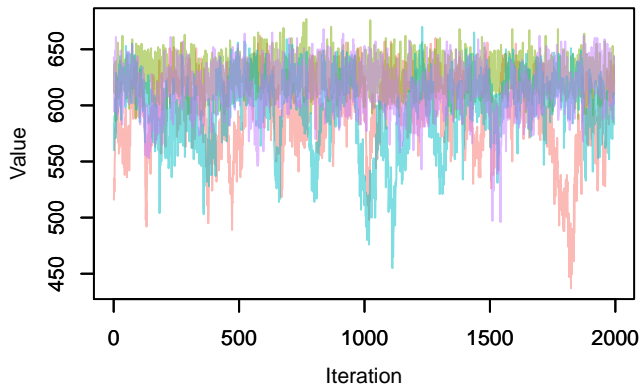**Density – y[143]**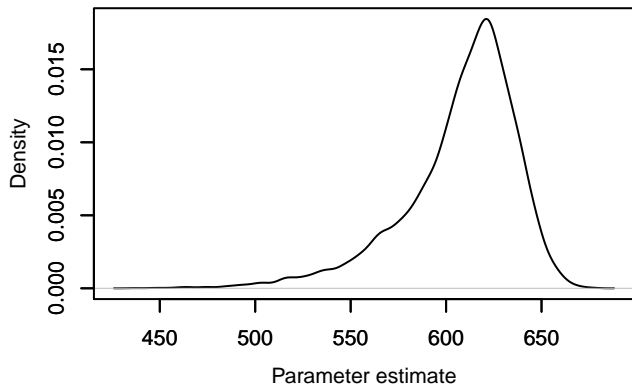**Trace – y[144]**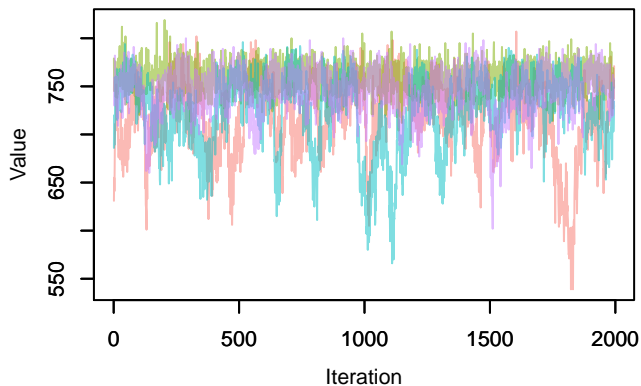**Density – y[144]**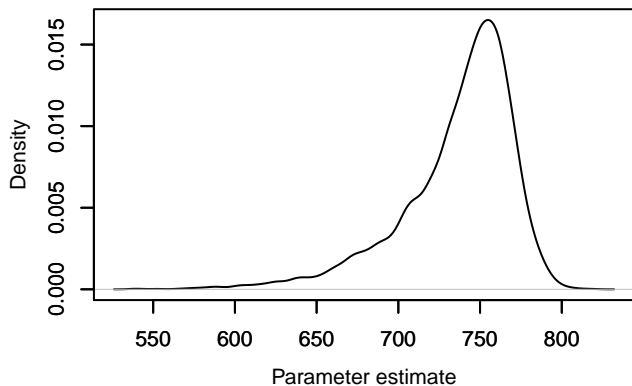

**Trace – y[145]**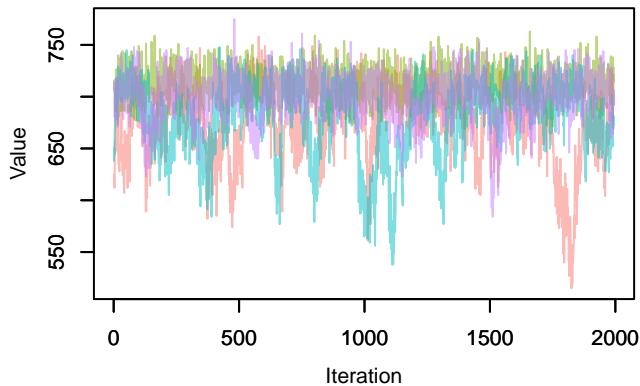**Density – y[145]**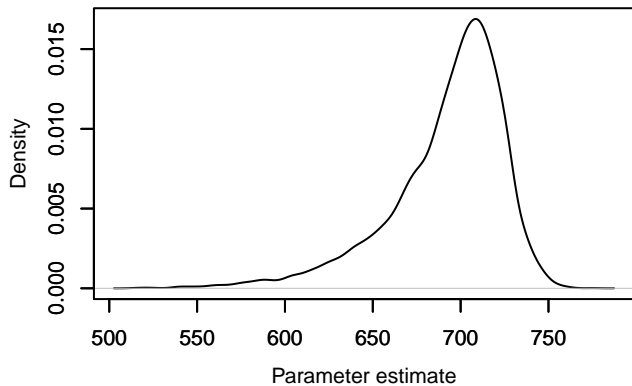**Trace – y[146]**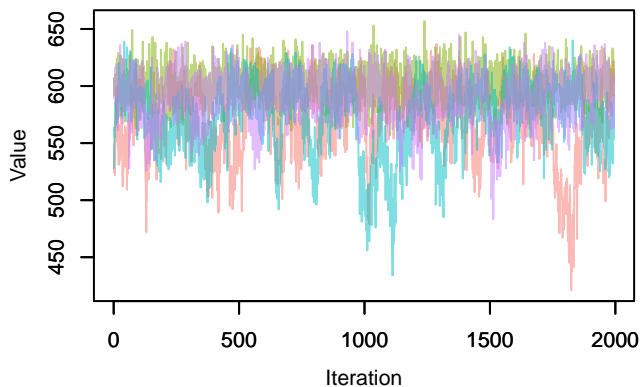**Density – y[146]**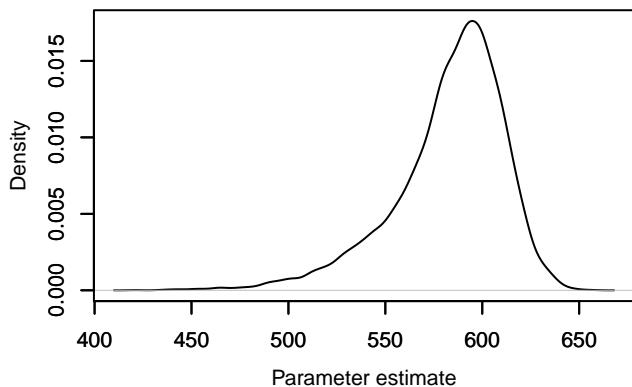**Trace – y[147]**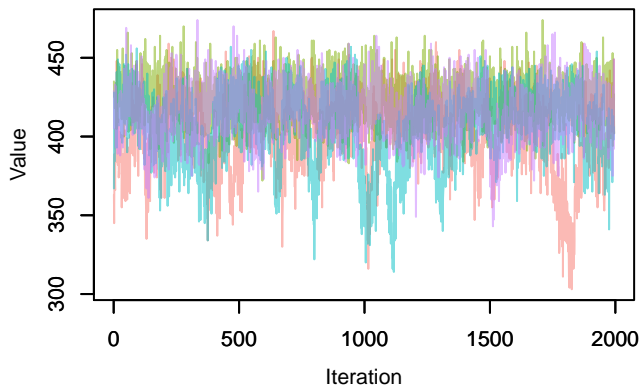**Density – y[147]**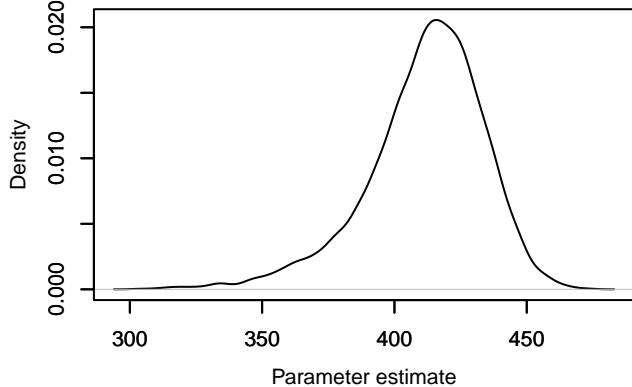

**Trace – y[148]**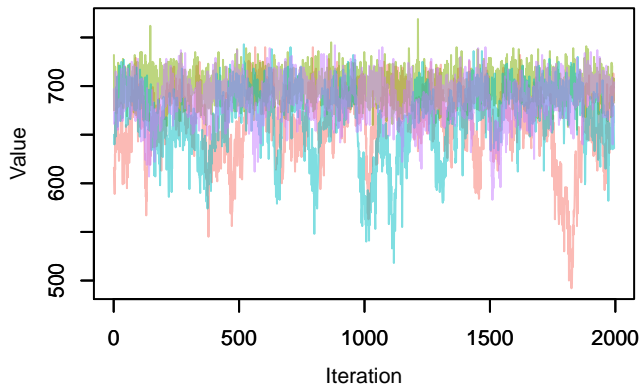**Density – y[148]**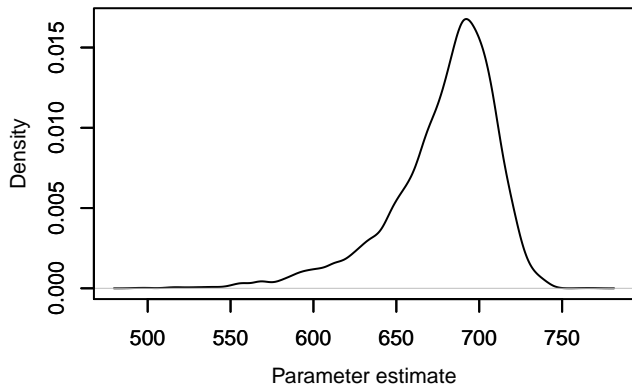**Trace – y[149]**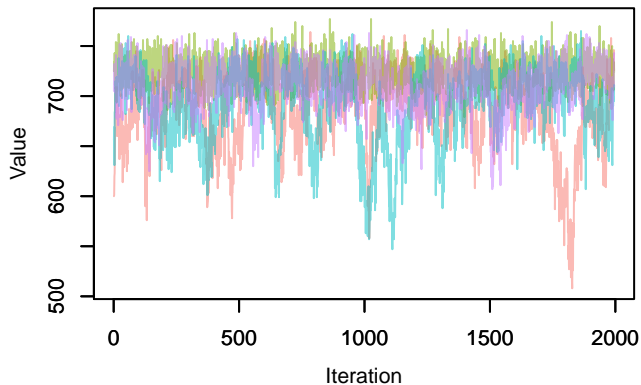**Density – y[149]**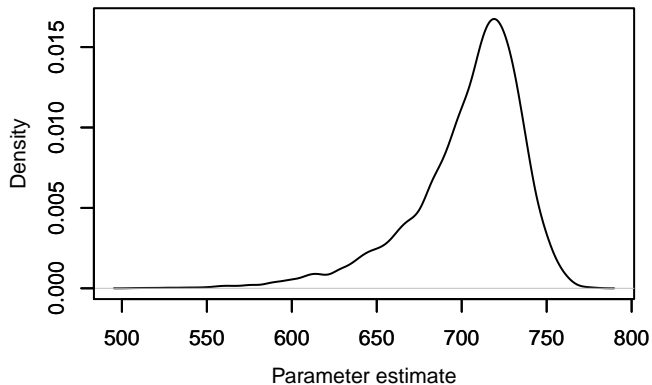**Trace – y[150]**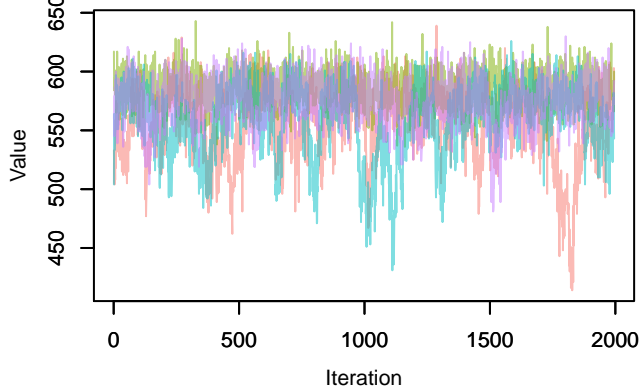**Density – y[150]**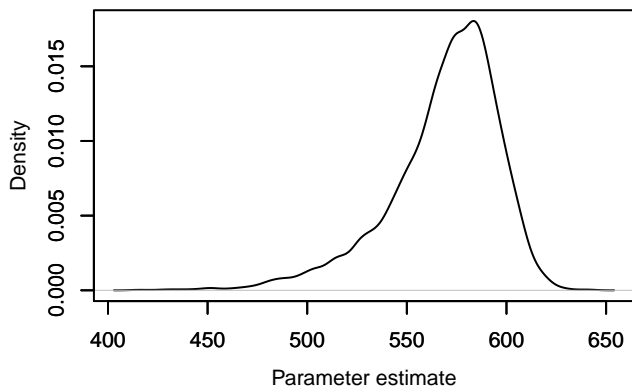

**Trace – y[151]**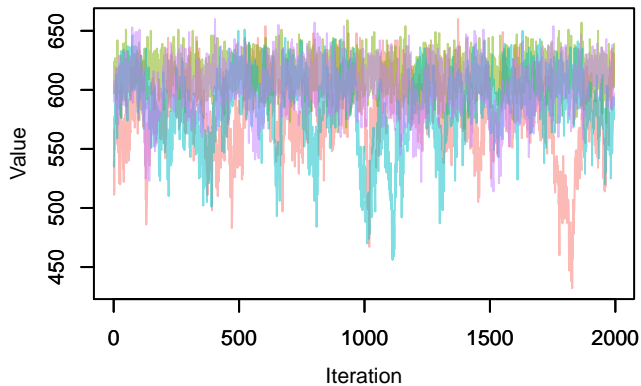**Density – y[151]**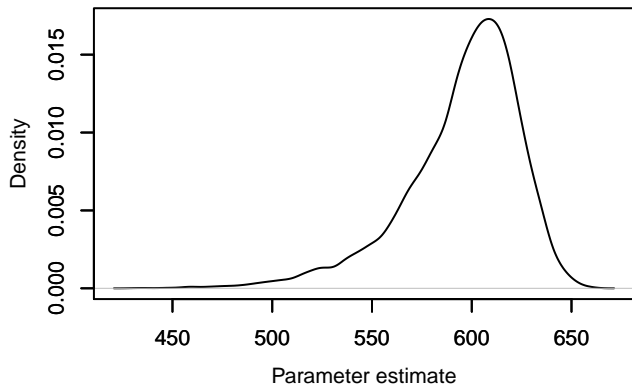**Trace – y[152]**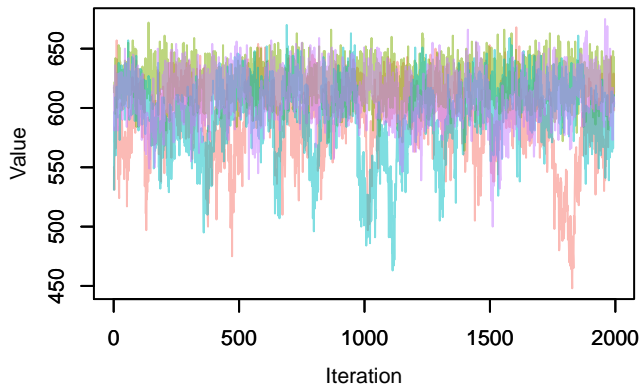**Density – y[152]**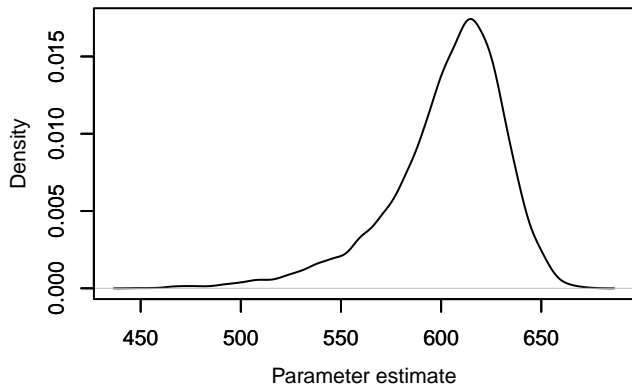**Trace – y[153]**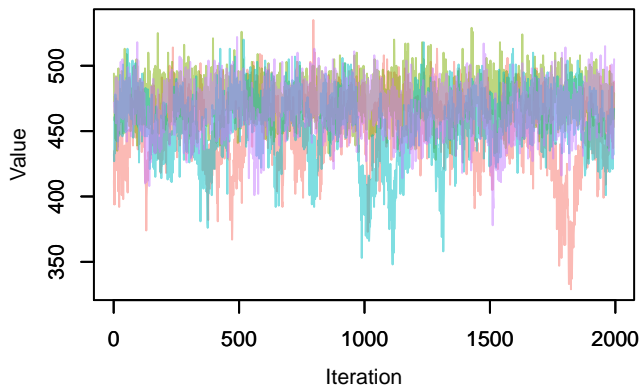**Density – y[153]**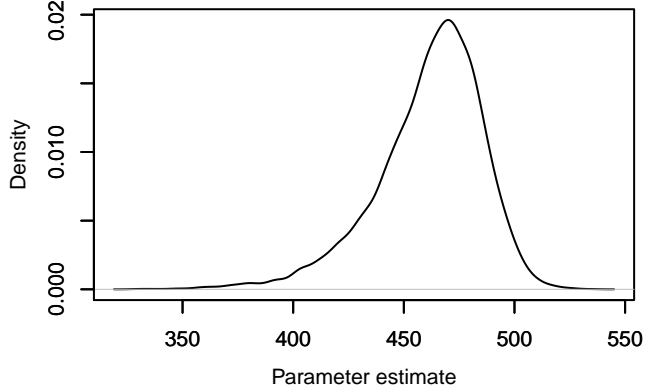

**Trace – y[154]**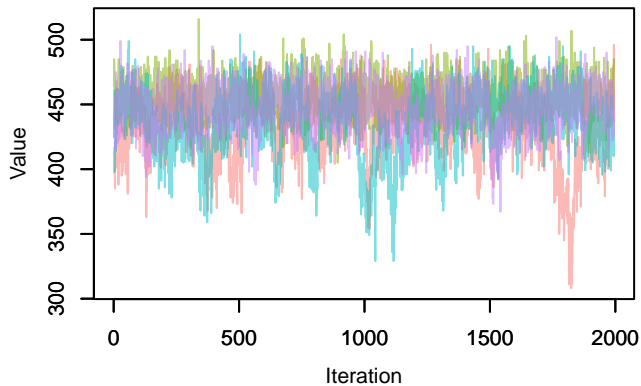**Density – y[154]**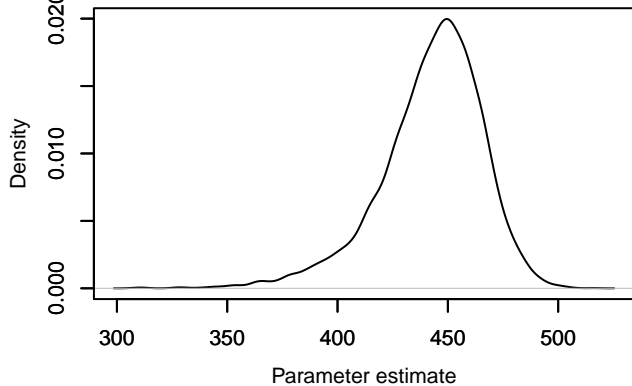**Trace – y[155]**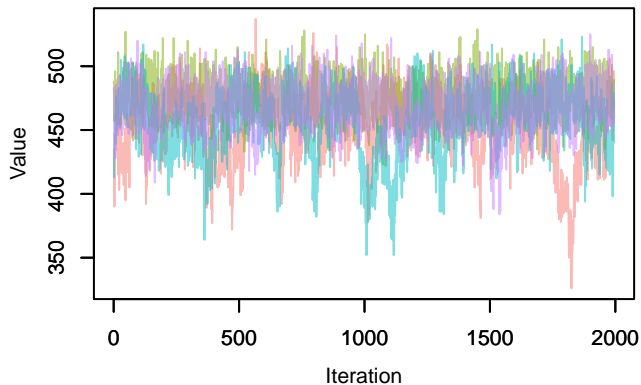**Density – y[155]**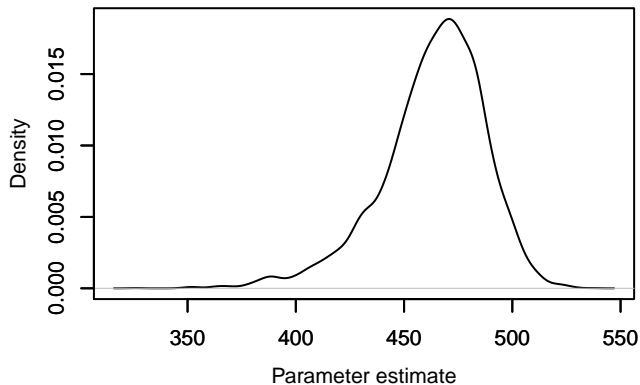**Trace – y[156]**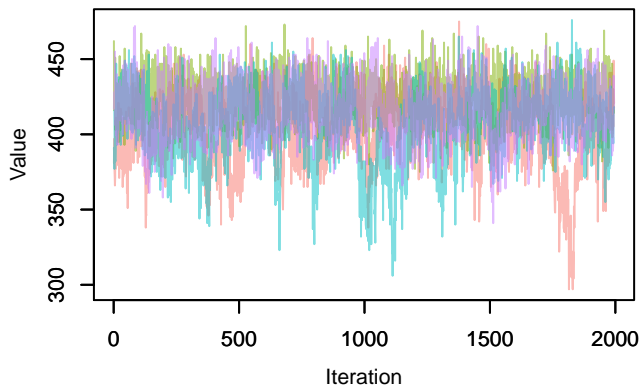**Density – y[156]**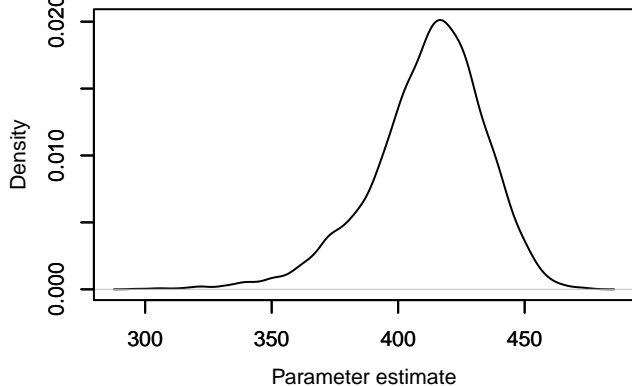

**Trace – y[157]**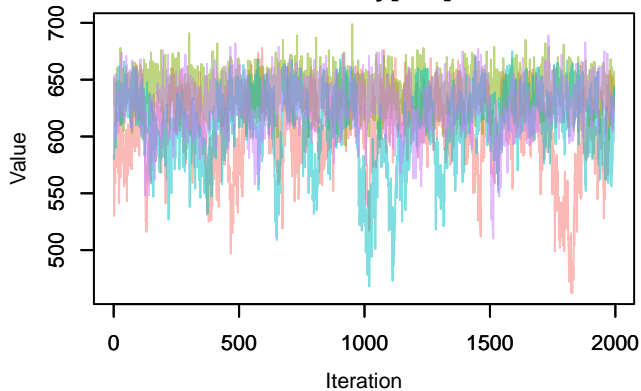**Density – y[157]**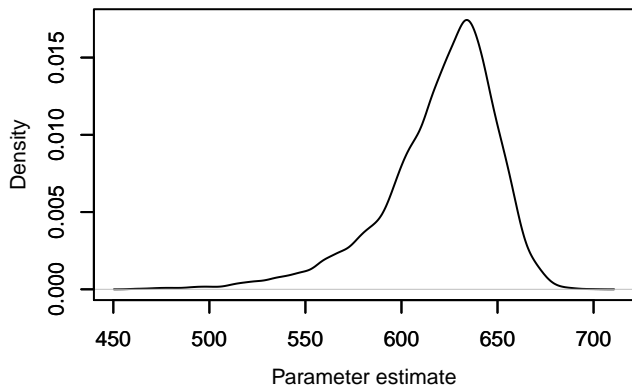**Trace – y[158]**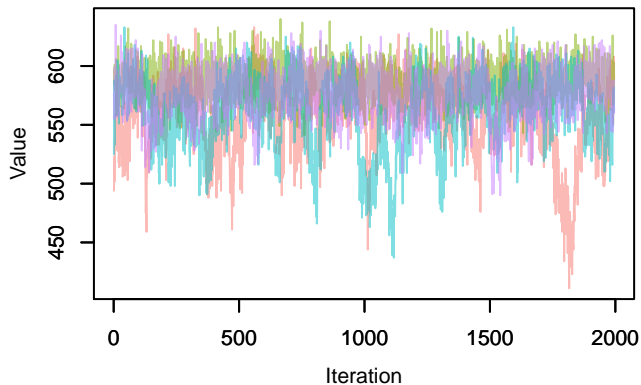**Density – y[158]**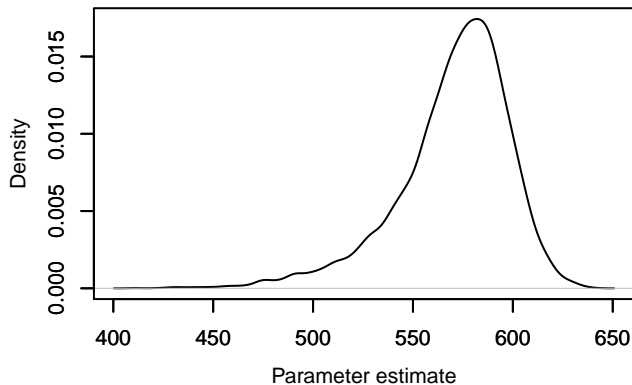**Trace – y[159]**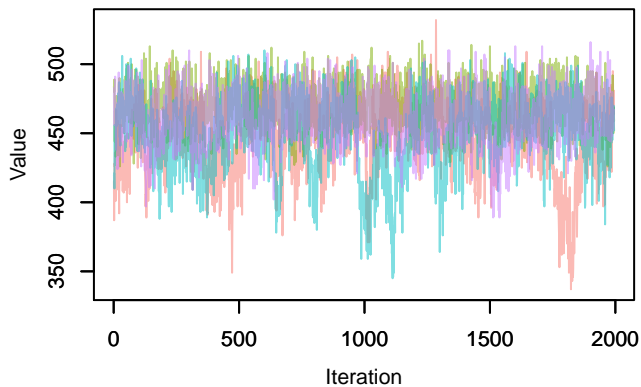**Density – y[159]**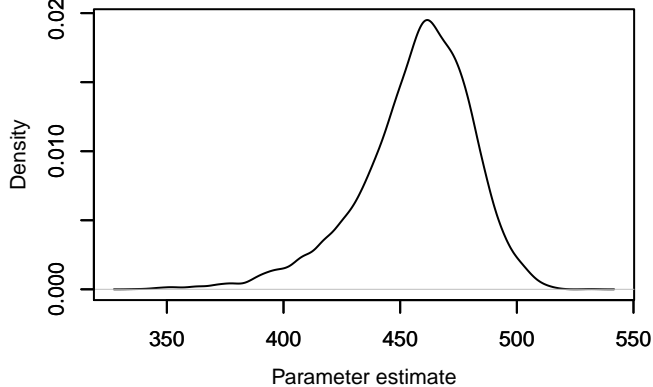

**Trace – y[160]**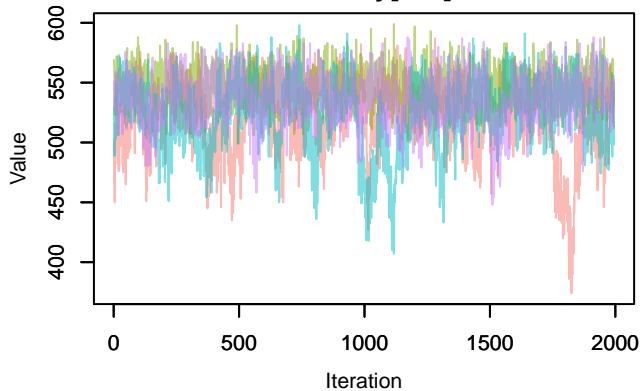**Density – y[160]**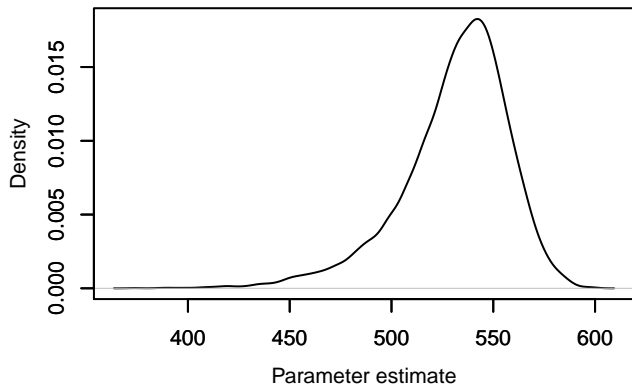**Trace – y[161]**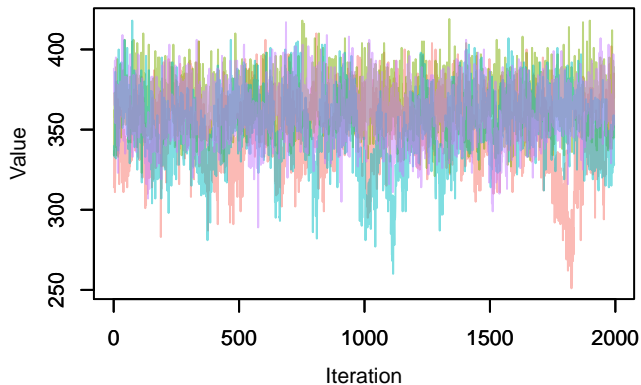**Density – y[161]**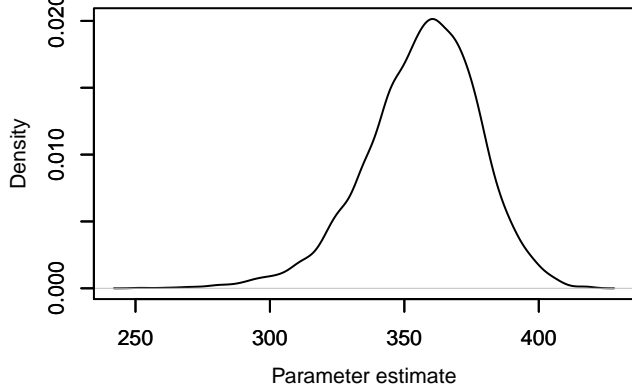**Trace – y[162]**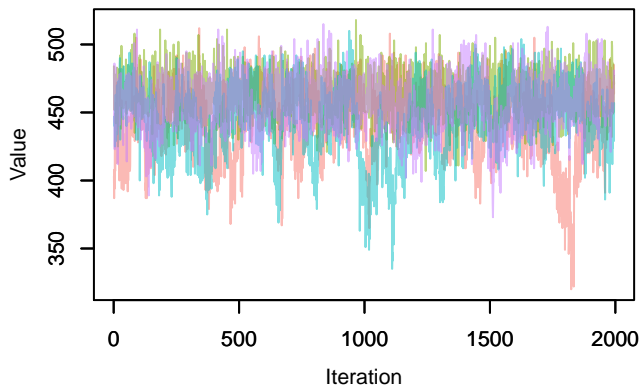**Density – y[162]**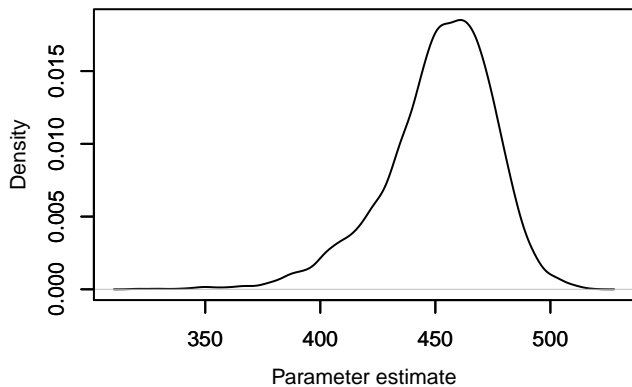



**Trace – y[163]**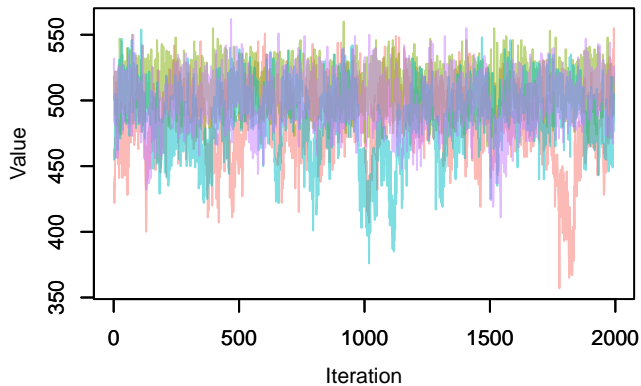**Density – y[163]**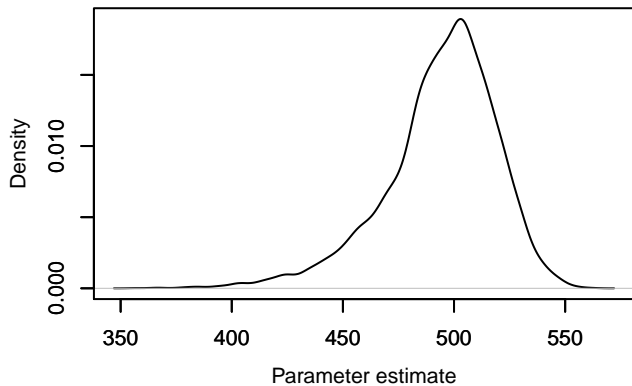**Trace – y[164]**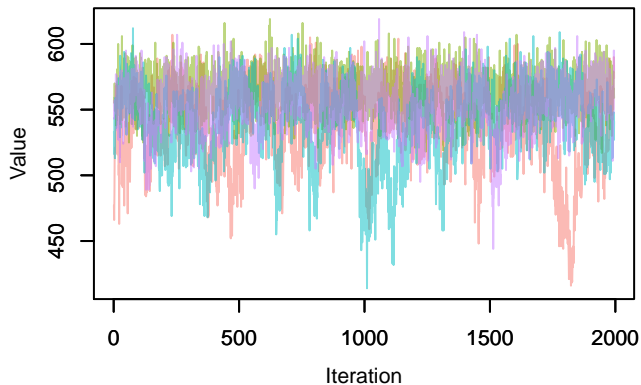**Density – y[164]**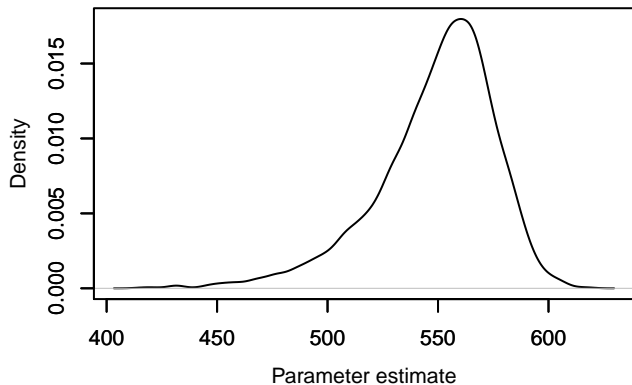**Trace – y[165]**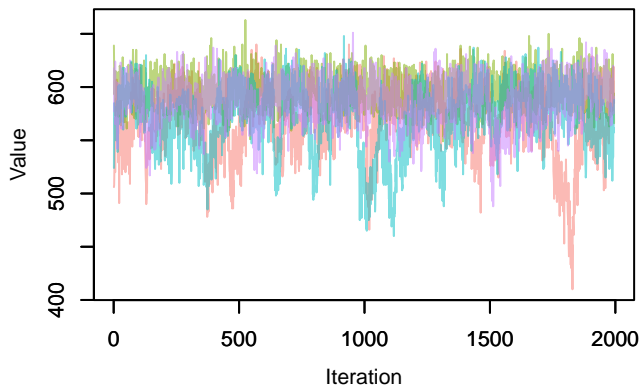**Density – y[165]**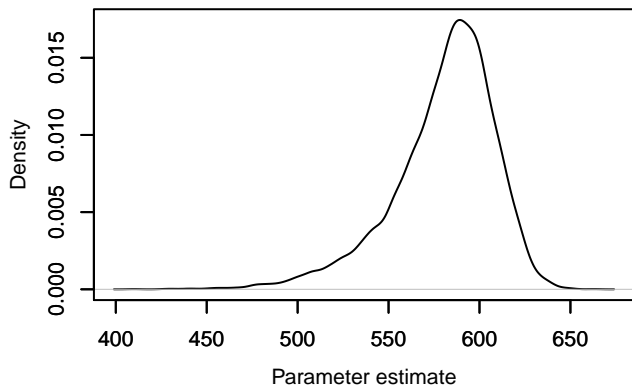

**Trace – y[166]**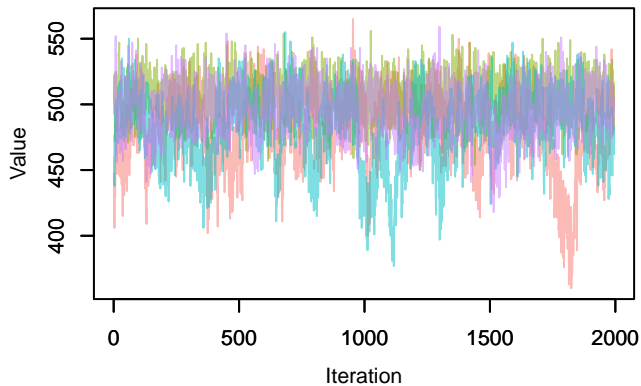**Density – y[166]**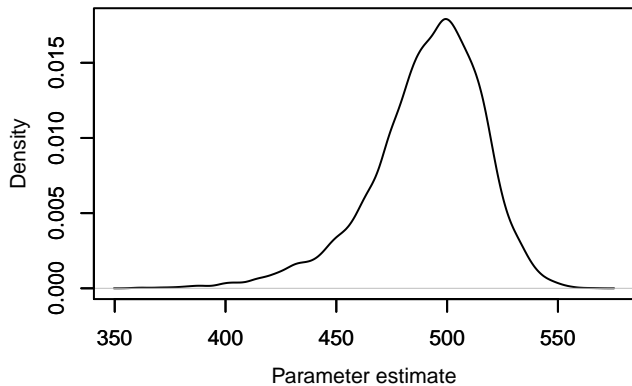**Trace – y[167]**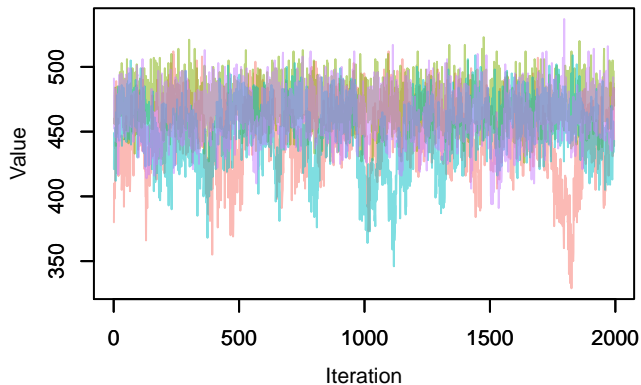**Density – y[167]**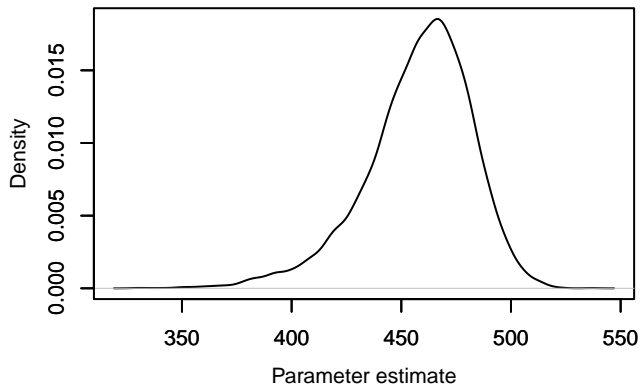**Trace – y[168]**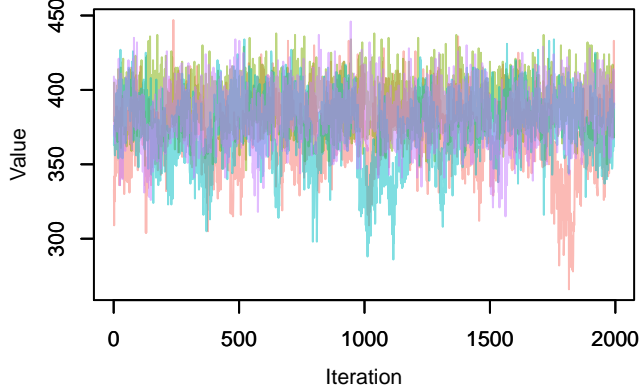**Density – y[168]**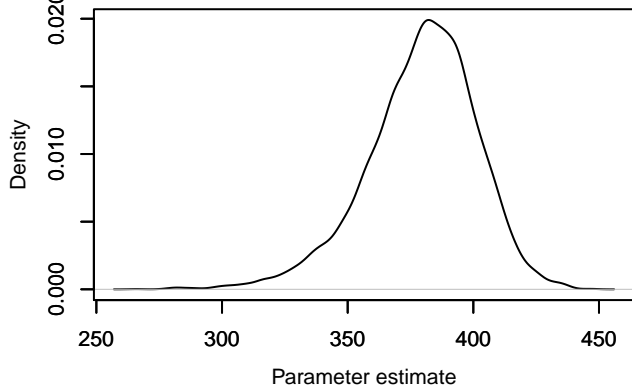

**Trace – y[169]**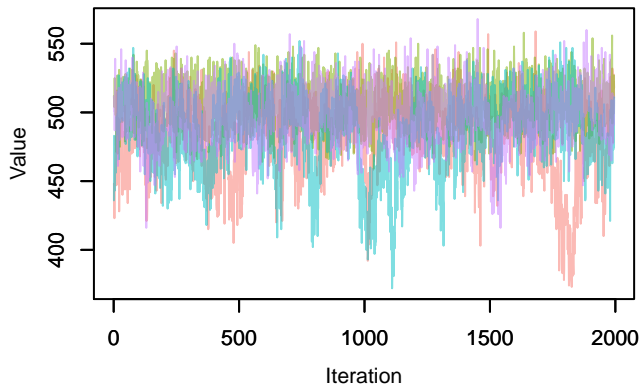**Density – y[169]**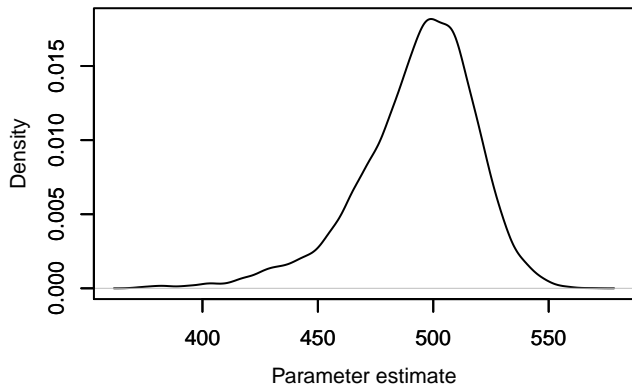**Trace – y[170]**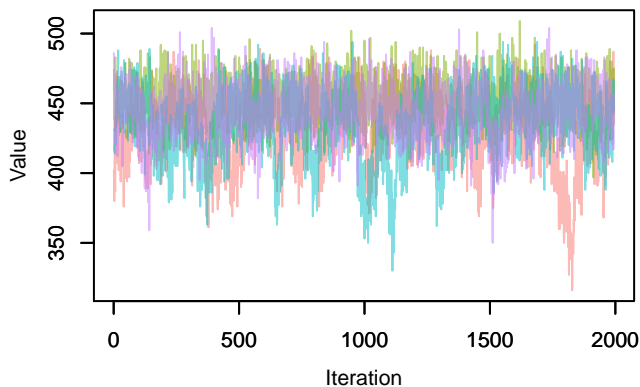**Density – y[170]**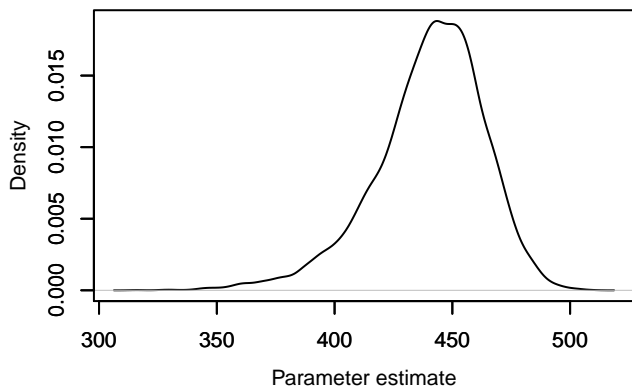**Trace – y[171]**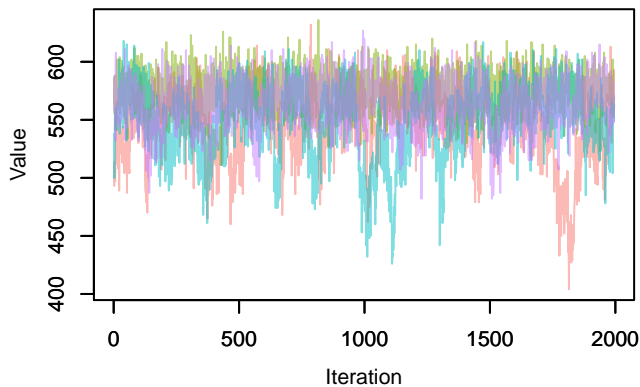**Density – y[171]**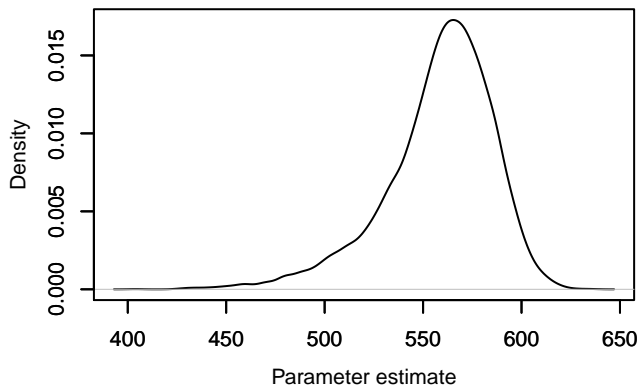

**Trace – y[172]**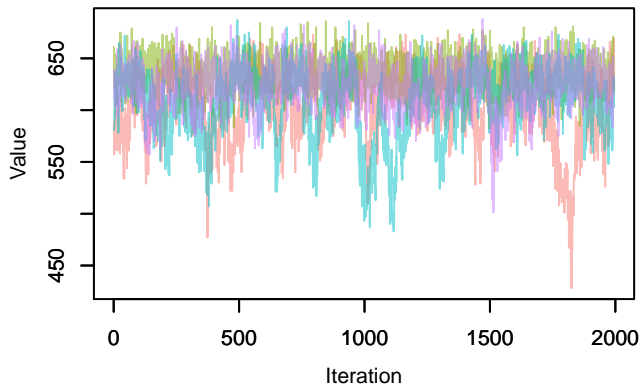**Density – y[172]**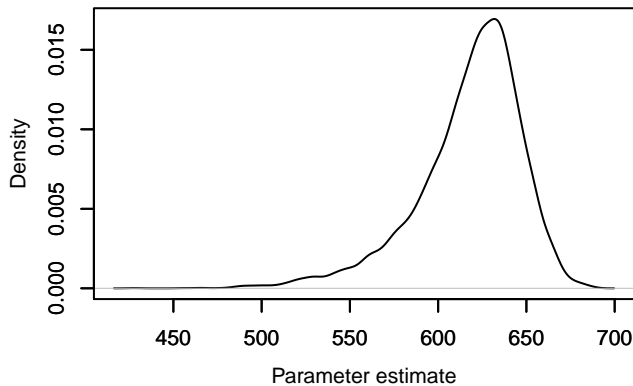**Trace – y[173]**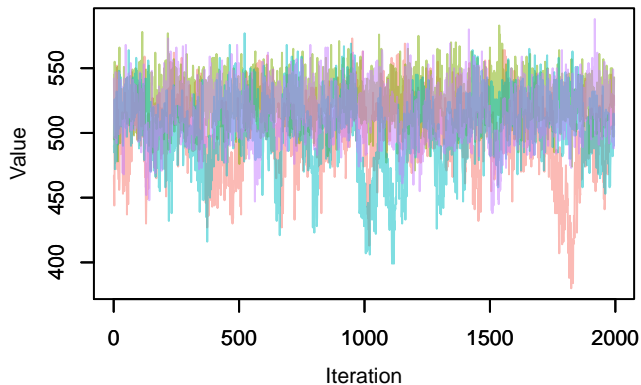**Density – y[173]**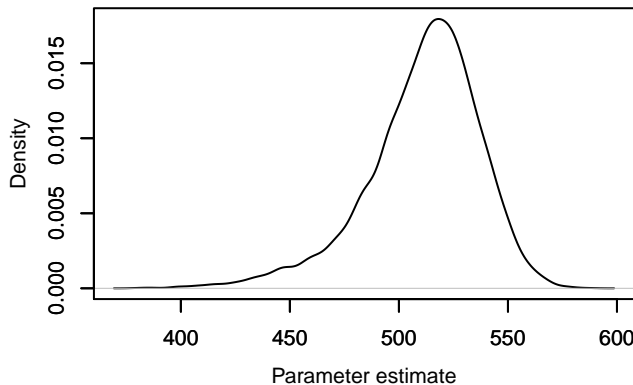**Trace – y[174]**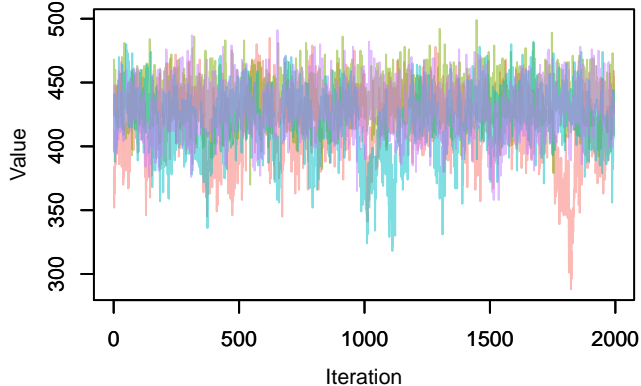**Density – y[174]**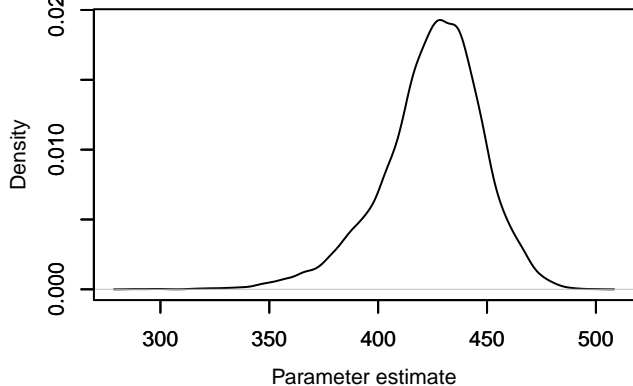

**Trace – y[175]**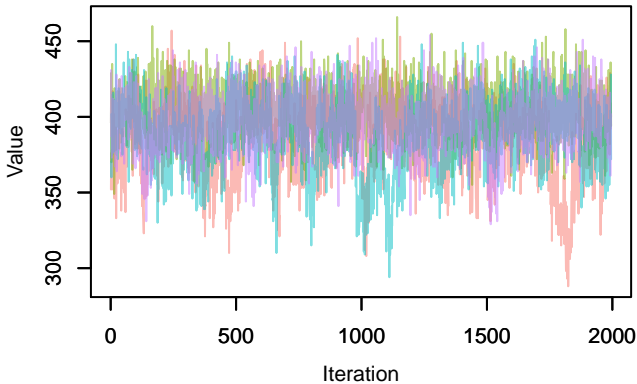**Density – y[175]**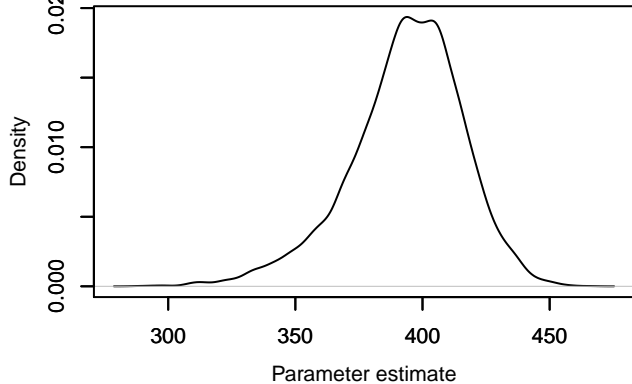**Trace – y[176]**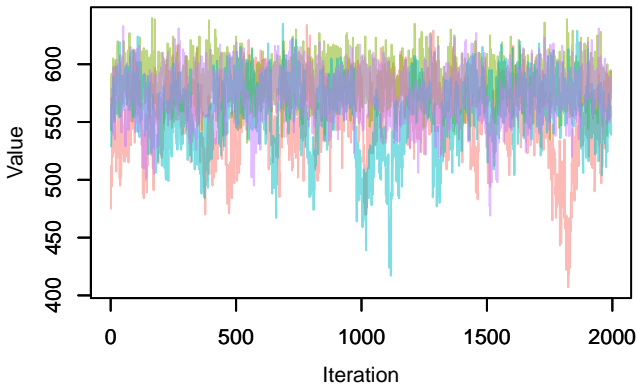**Density – y[176]**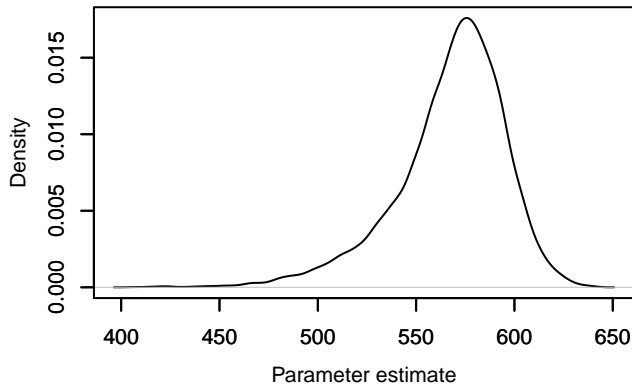**Trace – y[177]**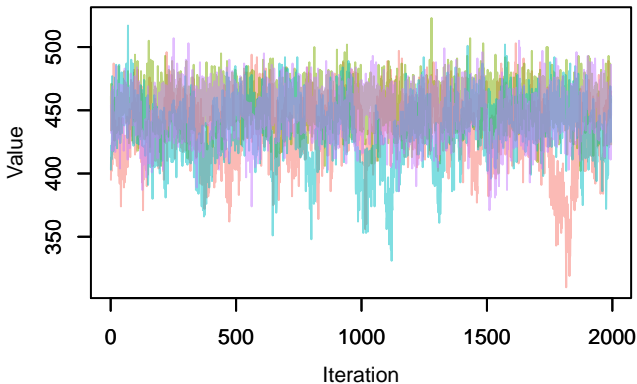**Density – y[177]**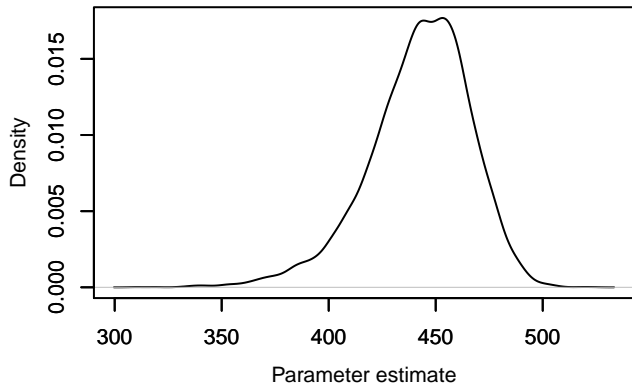

**Trace – y[178]**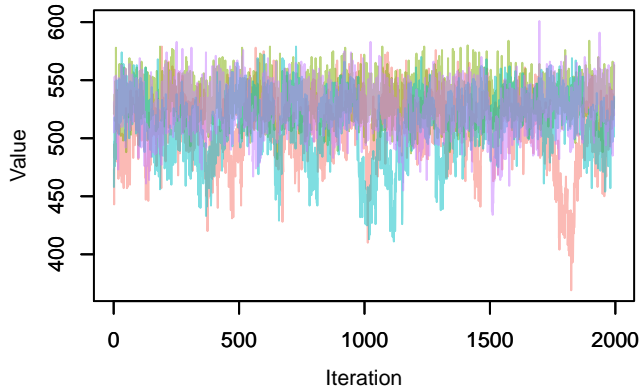**Density – y[178]**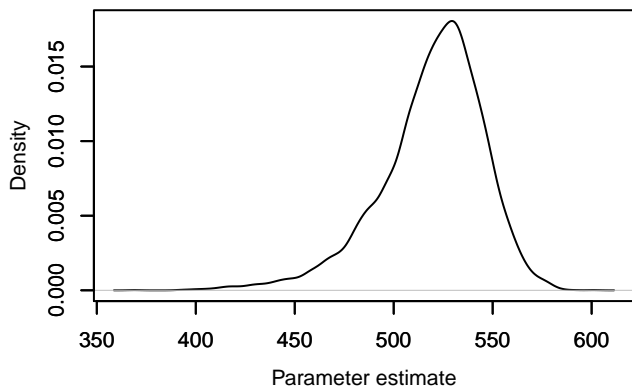**Trace – y[179]**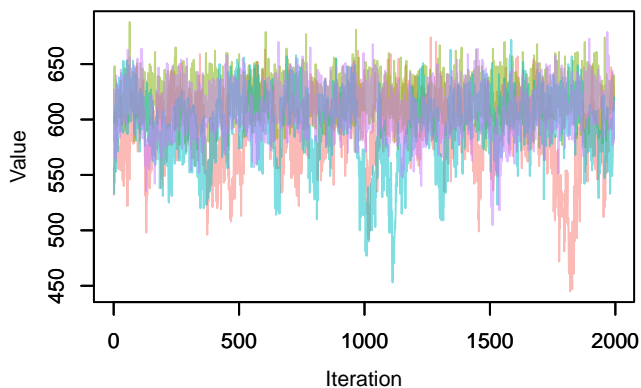**Density – y[179]**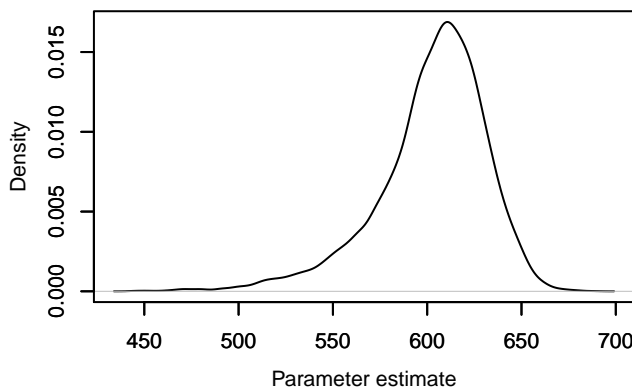**Trace – y[180]**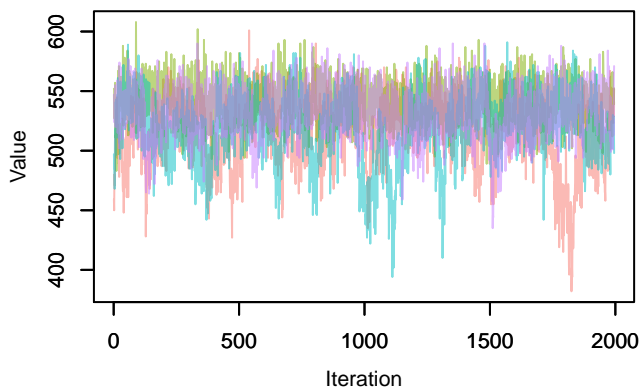**Density – y[180]**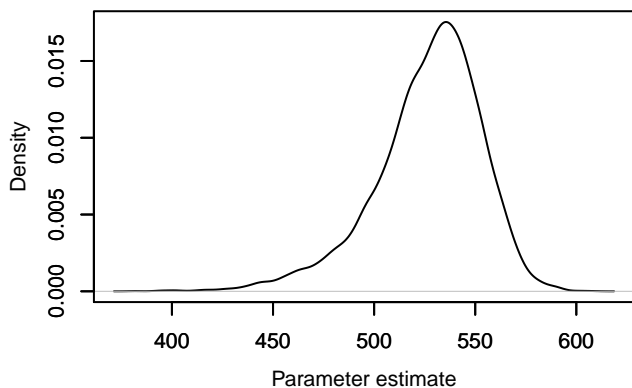

**Trace – y[181]**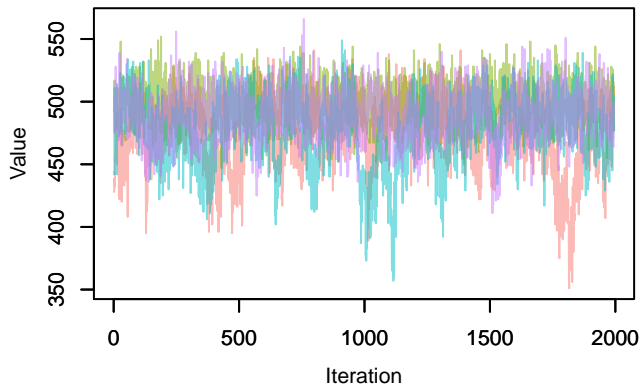**Density – y[181]**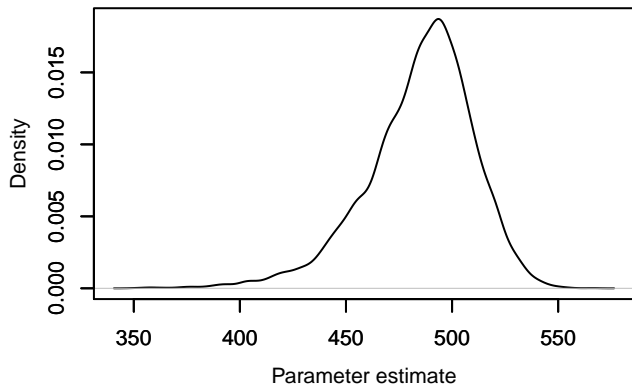**Trace – y[182]**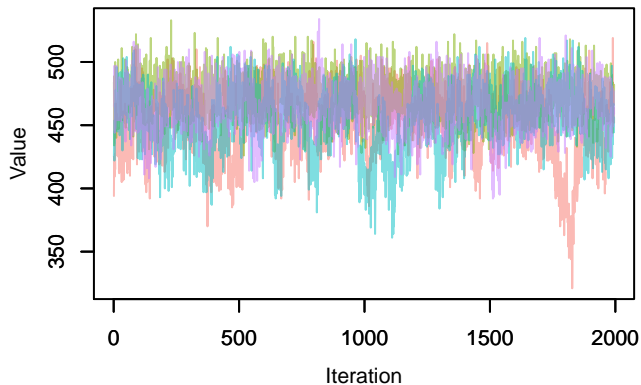**Density – y[182]**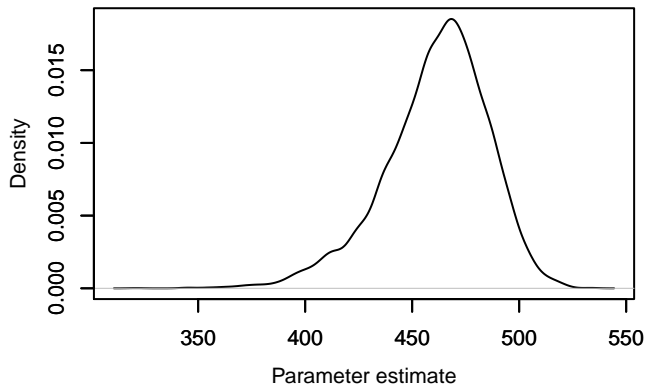**Trace – y[183]**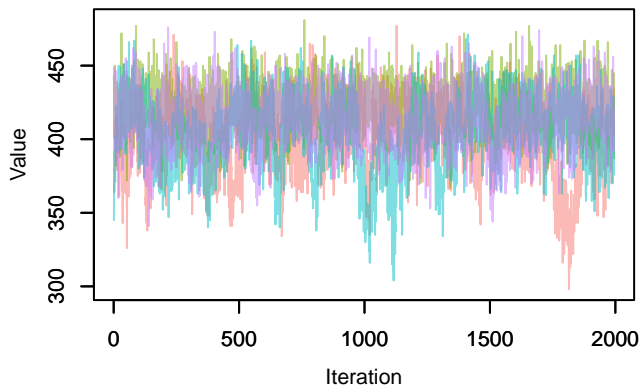**Density – y[183]**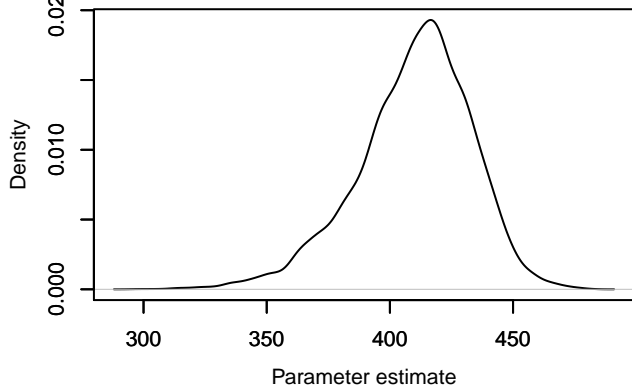

**Trace – y[184]**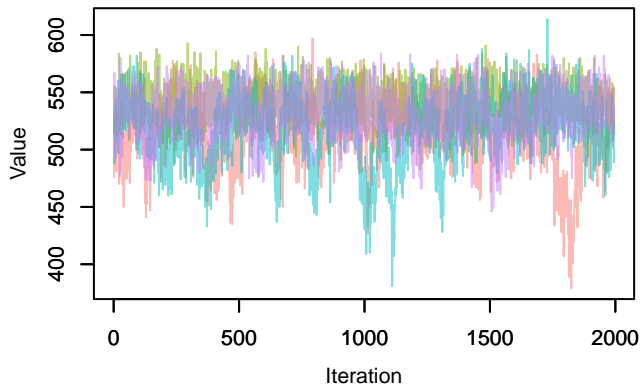**Density – y[184]**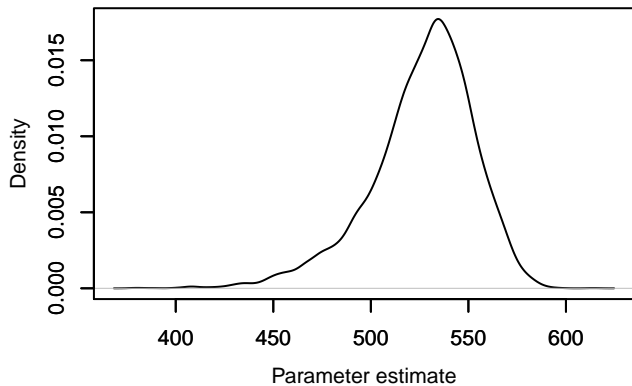**Trace – y[185]**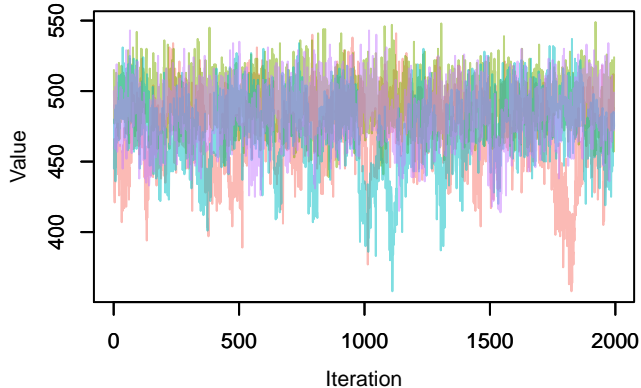**Density – y[185]**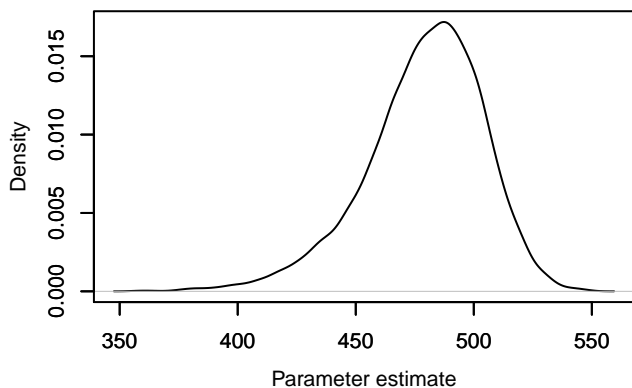**Trace – y[186]**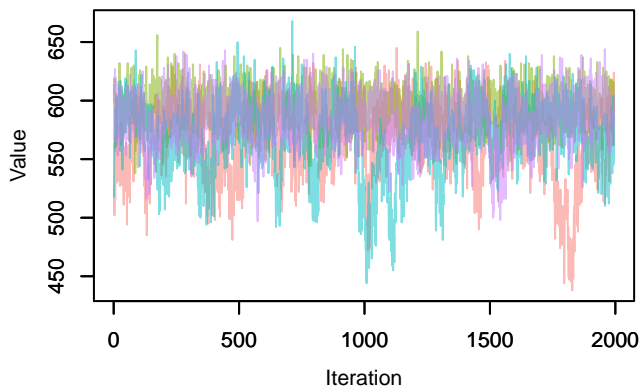**Density – y[186]**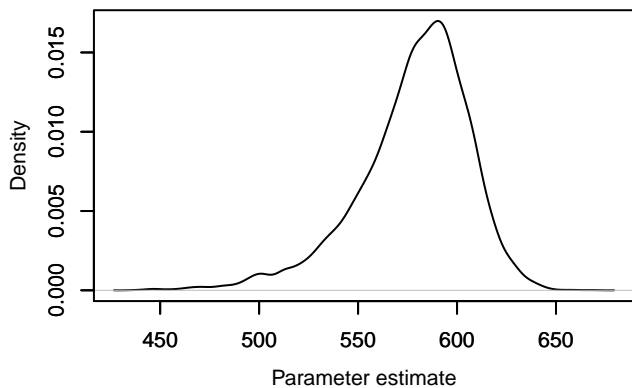



**Trace – y[187]**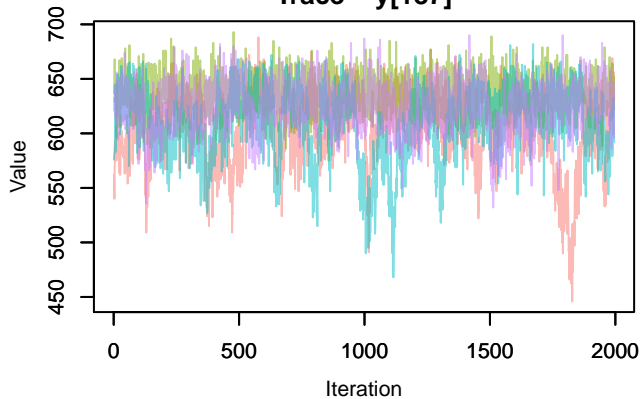**Density – y[187]**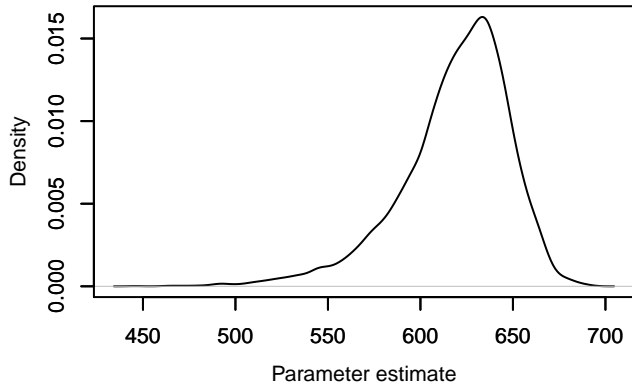**Trace – y[188]**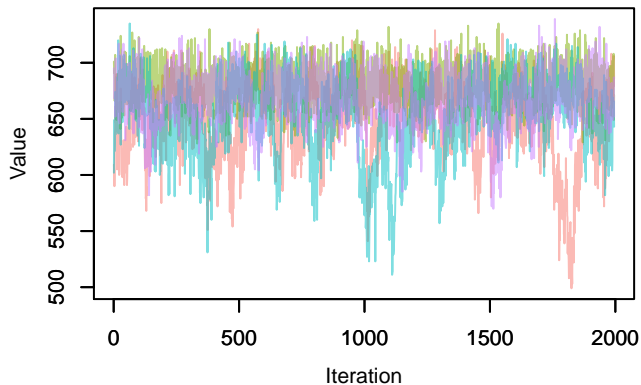**Density – y[188]**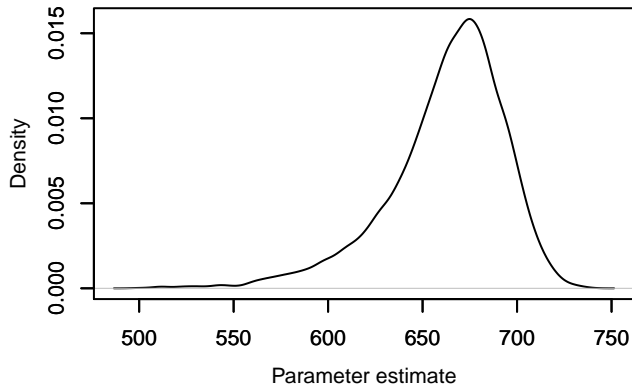**Trace – y[189]**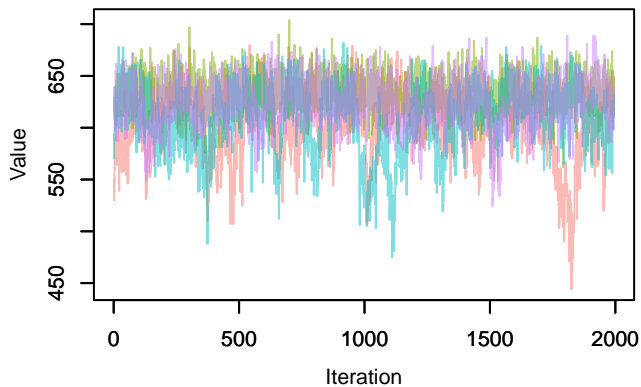**Density – y[189]**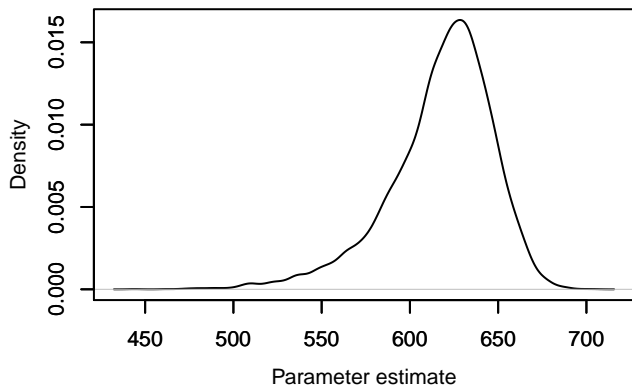

**Trace – y[190]**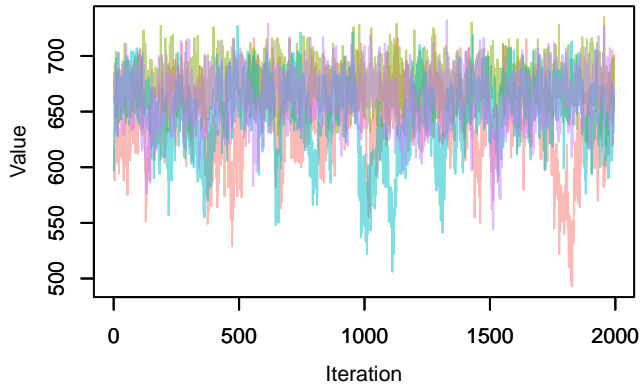**Density – y[190]**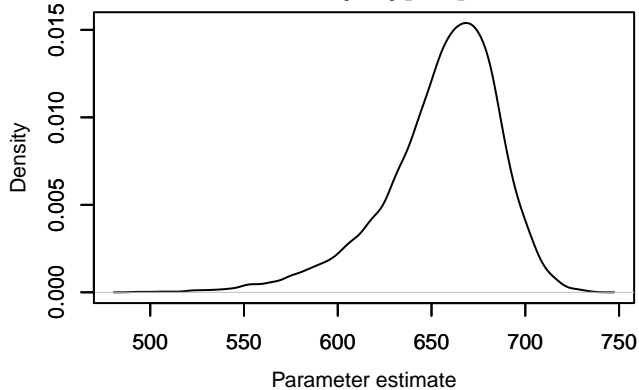**Trace – y[191]**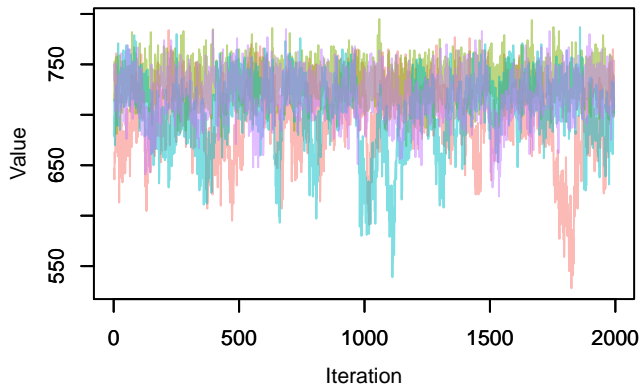**Density – y[191]**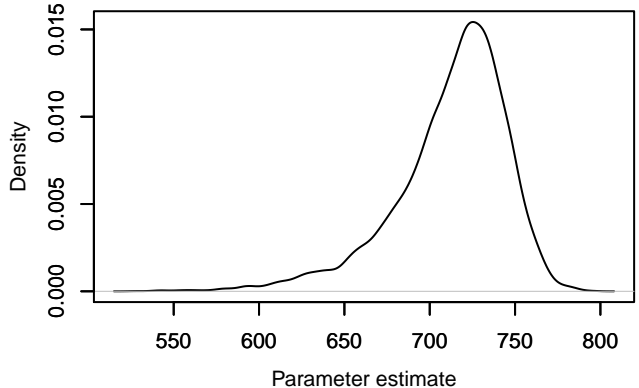**Trace – y[192]**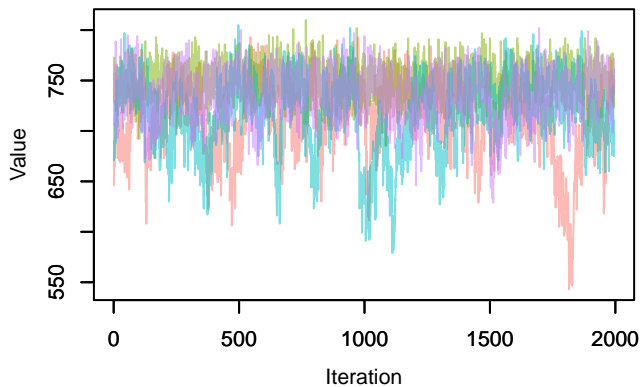**Density – y[192]**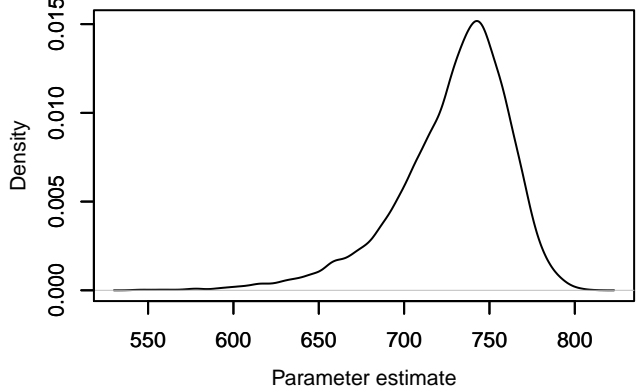

**Trace – y[193]**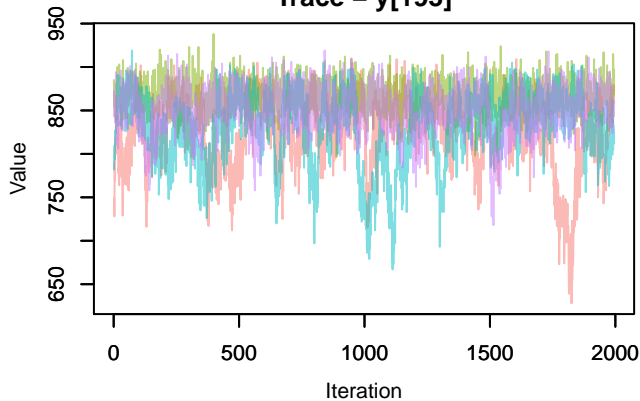**Density – y[193]**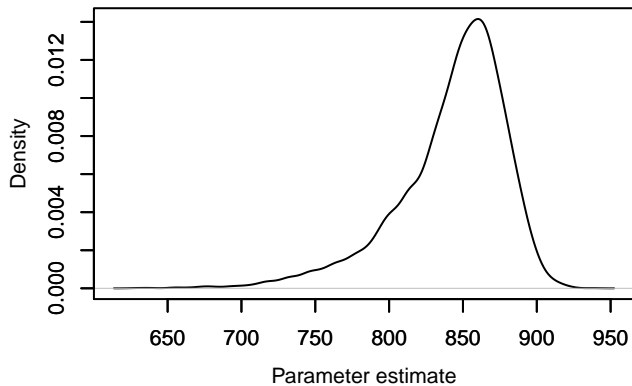**Trace – y[194]**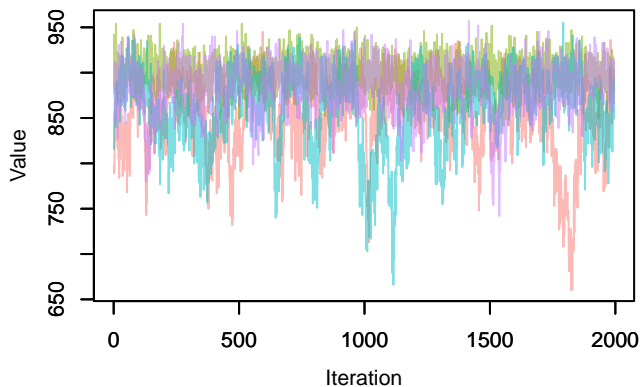**Density – y[194]**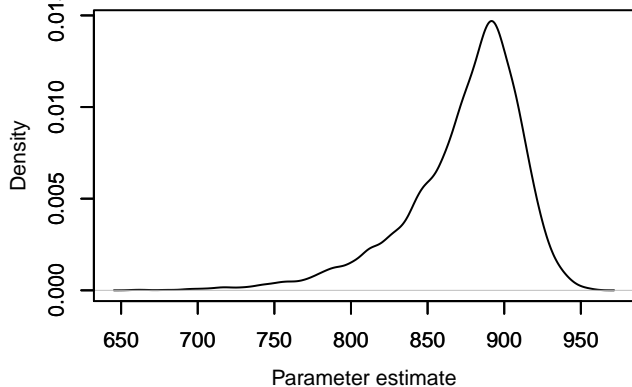**Trace – y[195]**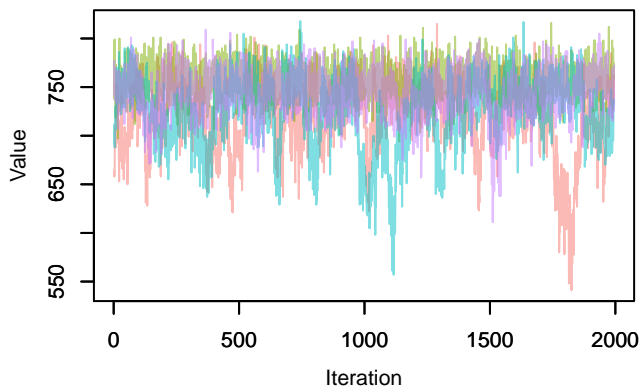**Density – y[195]**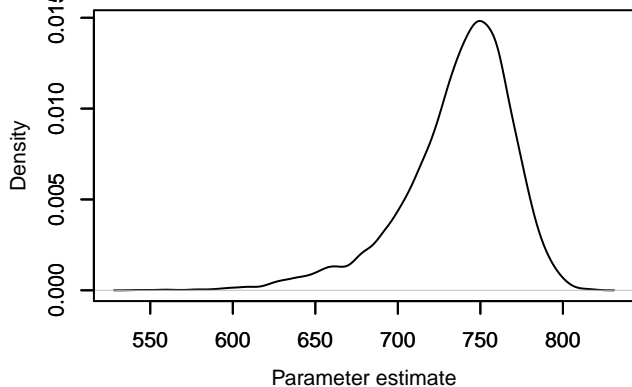

**Trace – y[196]**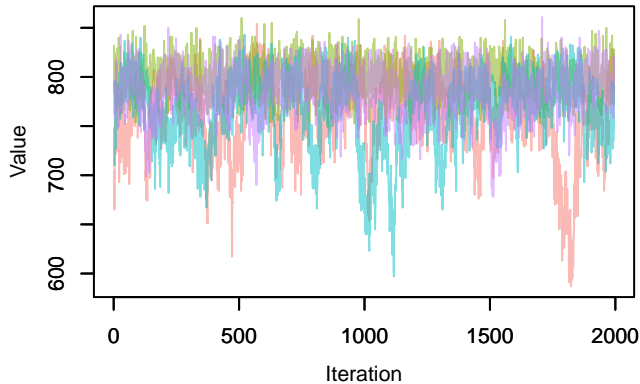**Density – y[196]**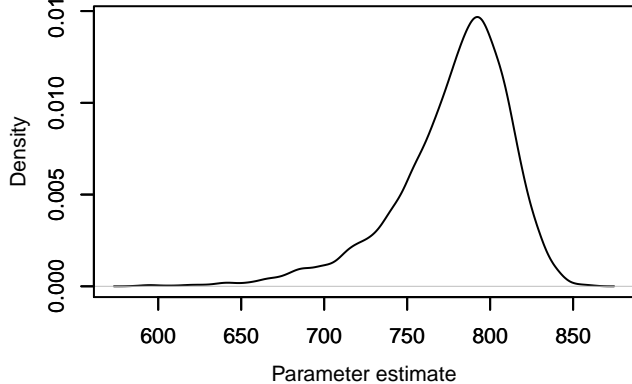**Trace – y[197]**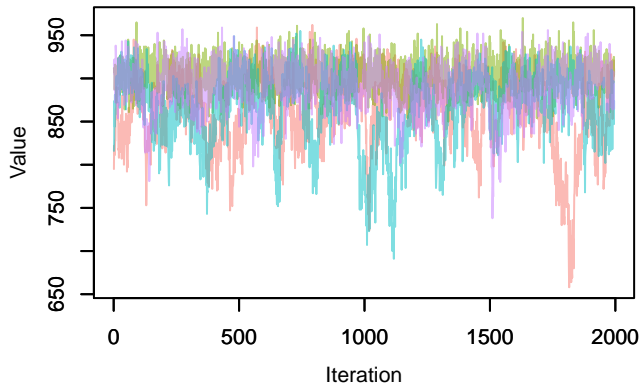**Density – y[197]**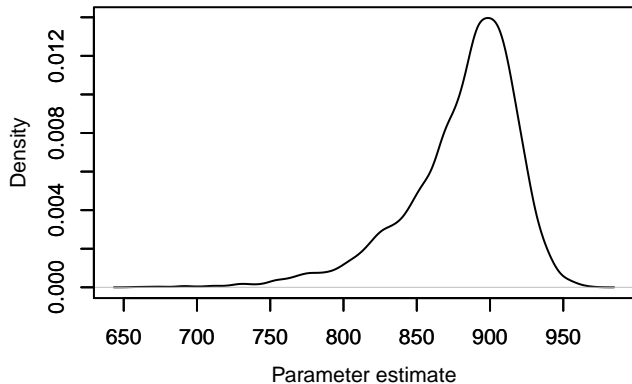**Trace – y[198]**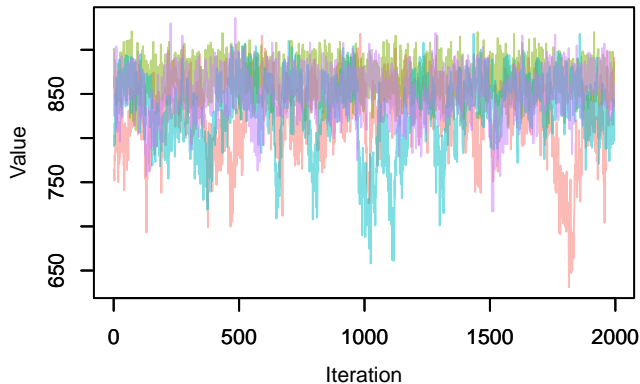**Density – y[198]**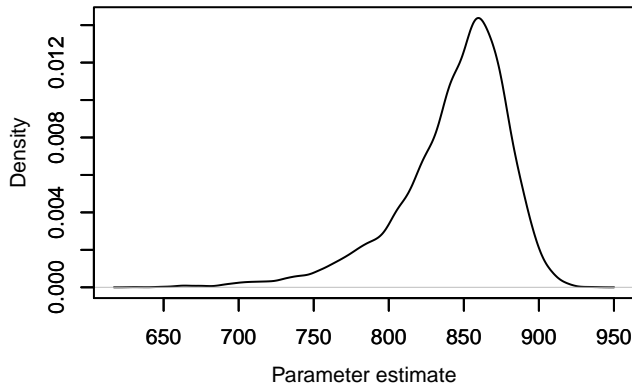

**Trace – y[199]**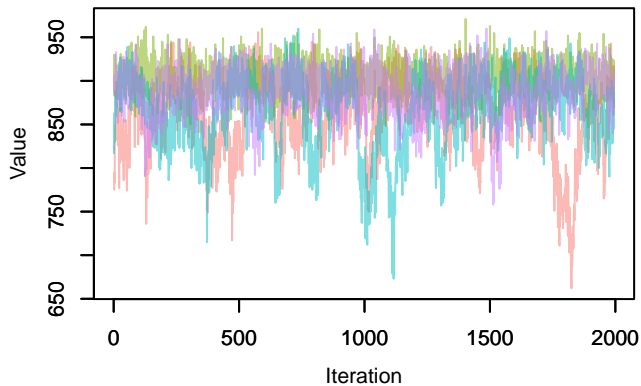**Density – y[199]**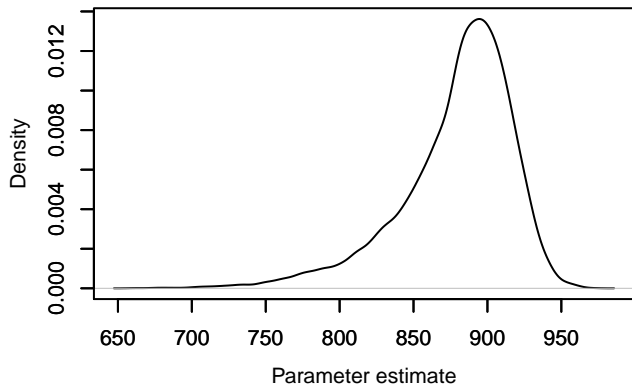**Trace – y[200]**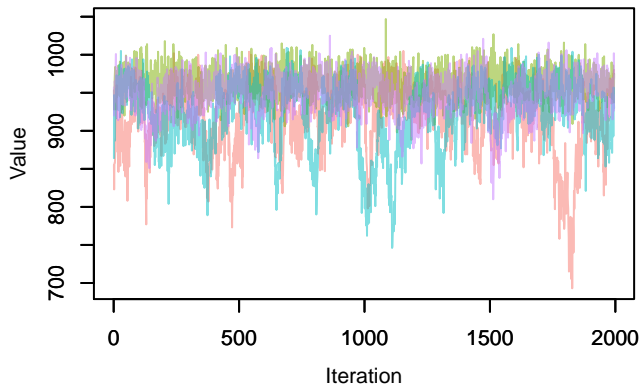**Density – y[200]**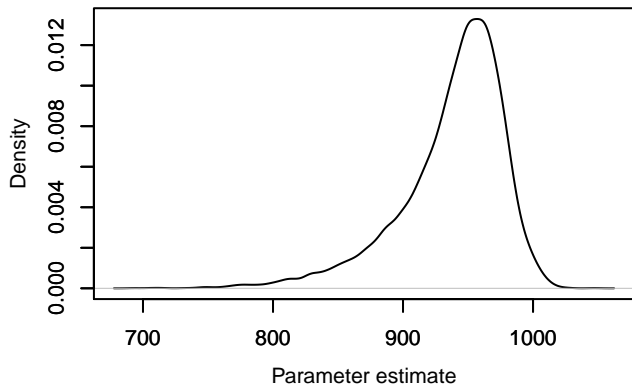**Trace – y[201]**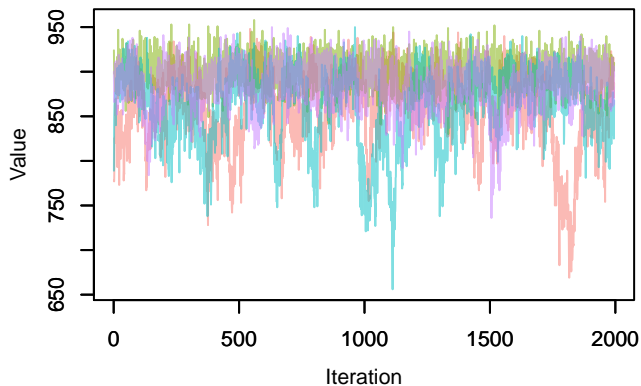**Density – y[201]**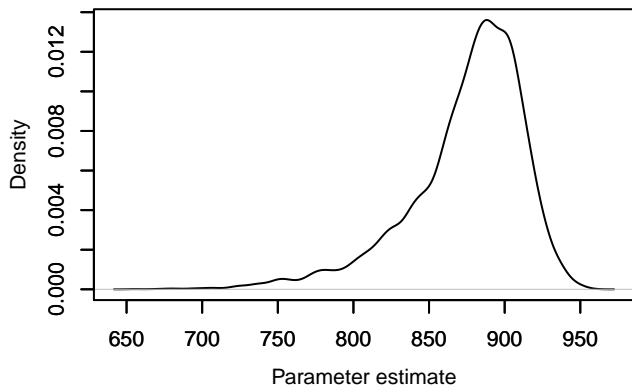

**Trace – y[202]**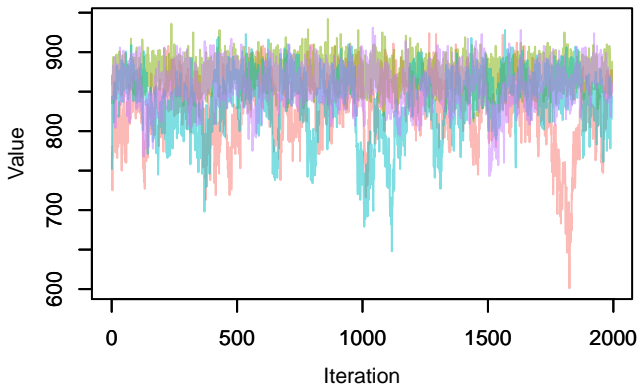**Density – y[202]**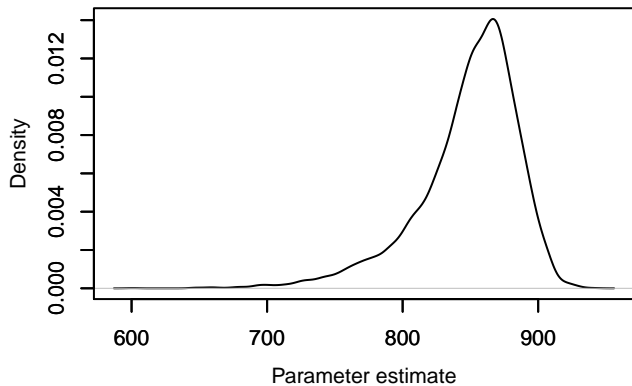**Trace – y[203]**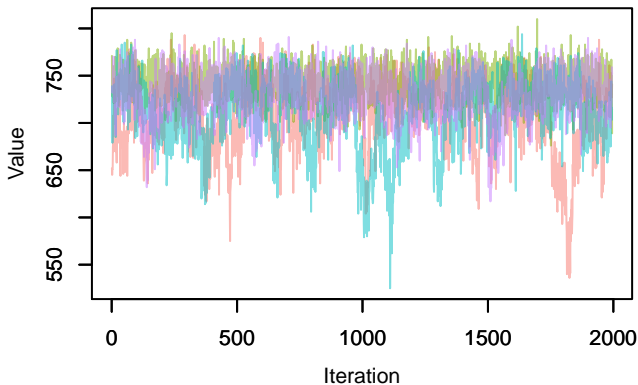**Density – y[203]**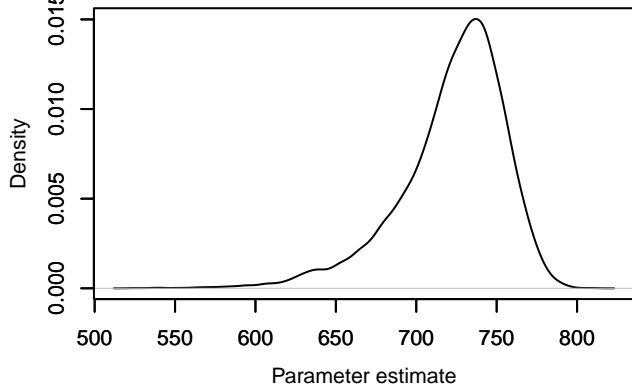**Trace – y[204]**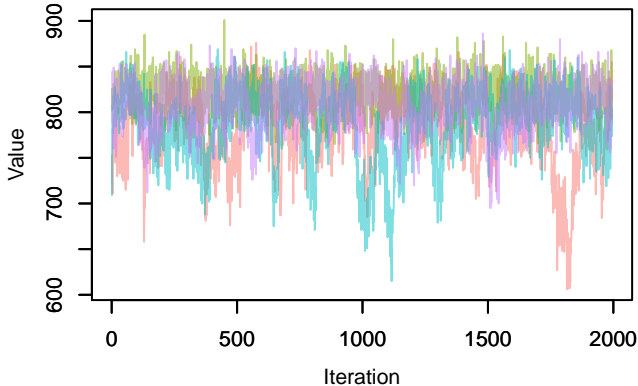**Density – y[204]**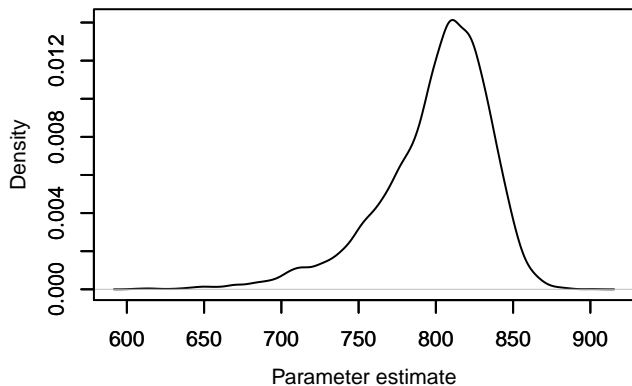

**Trace – y[205]**

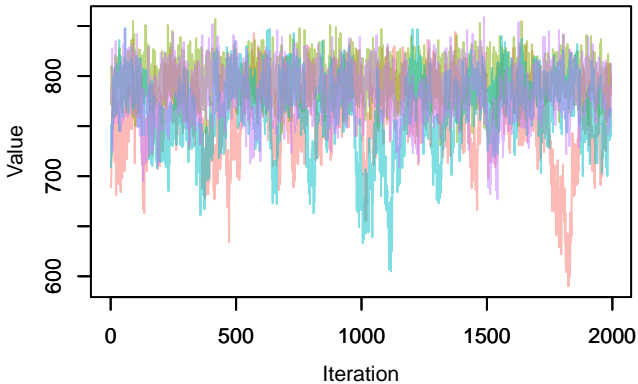

**Density – y[205]**

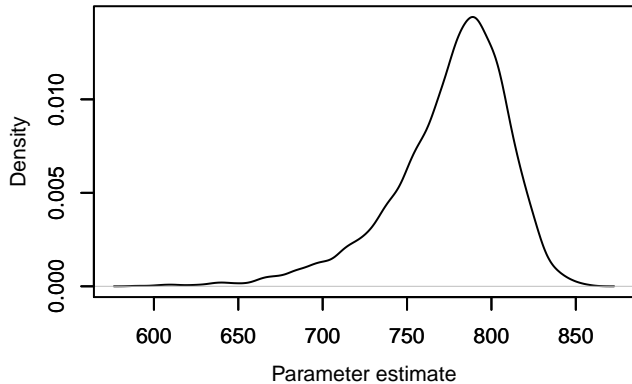

**Trace – y[206]**

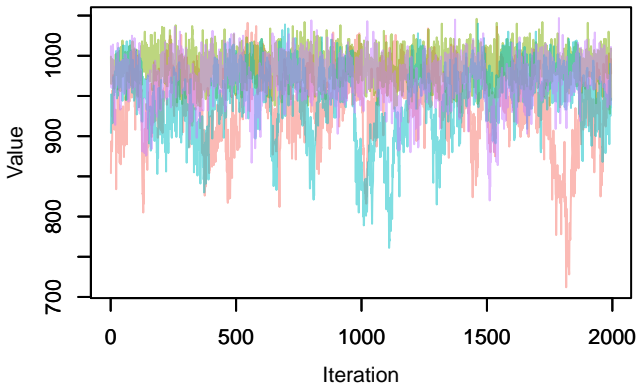

**Density – y[206]**

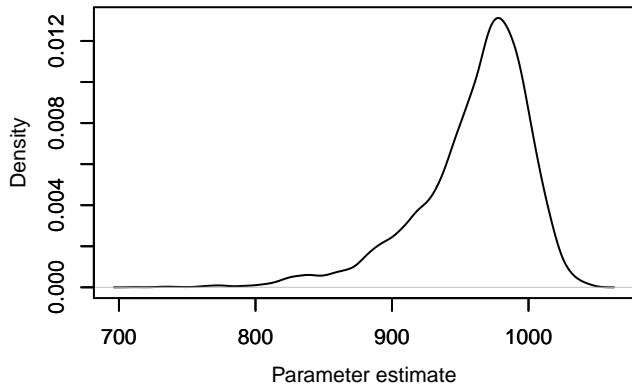

Supplement: NIHMS1724013-supplement-eAppendix.pdf [file NIHMS1724013-supplement-eAppendix.pdf]
